# Supplementary material for: Electrochemical 5-exo-dig aza-cyclization of 2-alkynylbenzamides toward 3-hydroxyisoindolinone derivatives
Source: Royal Society of Chemistry journal article supplement (doi:10.1039/d2ob00637e), 2022-01-01
Supplement: d2ob00637e1.pdf [file d2ob00637e1.pdf]

## *Supporting Information*

### **Electrochemical 5-*exo-dig* aza-cyclization of 2-alkynylbenzamides toward 3-hydroxyisoindolinone derivatives**

Zhaojiang Shi, †<sup>a</sup> Nan Li, †<sup>a</sup> Wei-Zhen Wang,<sup>a</sup> Hao-Kuan Lu,<sup>a</sup> Yaofeng Yuan,<sup>\*a</sup> Zhen Li,<sup>b</sup> and Ke-Yin Ye<sup>\* a,c</sup>

<sup>a</sup> Institute of Pharmaceutical Science and Technology, College of Chemistry, Fuzhou University, Fuzhou 350108, China.

E-mail: yaofeng\_yuan@fzu.edu.cn (Y.Y.); kyue@fzu.edu.cn (K.Y.)

<sup>b</sup> Institute of Molecular Aggregation Science, Tianjin University, Tianjin 300072, China.

<sup>c</sup> State Key Laboratory of Physical Chemistry of Solid Surfaces, Xiamen University, Xiamen 361005, China.

† These authors contributed equally to this work.

## Table of Contents

|                                                                                |    |
|--------------------------------------------------------------------------------|----|
| <b>1. General Information</b> .....                                            | 3  |
| <b>2. General Procedures</b> .....                                             | 5  |
| <b>3. Characterization of Products</b> .....                                   | 11 |
| <b>4. Radical Trapping Experiments</b> .....                                   | 26 |
| <b>5. Cyclic Voltammetry Studies</b> .....                                     | 26 |
| <b>6. Unsuccessful Substrates</b> .....                                        | 27 |
| <b>7. Attempt of Using Water as the Nucleophile</b> .....                      | 27 |
| <b>8. Proposed Mechanism for the Transformation from 6 to 28</b> .....         | 28 |
| <b>9. References</b> .....                                                     | 29 |
| <b>10. Spectral Data (<sup>1</sup>H, <sup>13</sup>C, <sup>19</sup>F)</b> ..... | 30 |
| <b>11. X-ray Crystallographic Data</b> .....                                   | 88 |

## 1. General Information

All reactions were performed under an atmosphere of argon using standard Schlenk techniques unless otherwise indicated. All commercial reagents were used without further purification unless otherwise noted. Reactions were monitored by thin-layer chromatography (TLC) analysis. TLC plates were viewed under UV light and stained with potassium permanganate. Yields refer to products isolated after purification by column chromatography unless otherwise stated. Proton nuclear magnetic resonance ( $^1\text{H}$  NMR) spectra, carbon nuclear magnetic resonance ( $^{13}\text{C}$  NMR) spectra, and fluorine nuclear magnetic resonance ( $^{19}\text{F}$  NMR) were recorded on Bruker AV-400 (400 MHz), JEOL-500 (500 MHz) spectrometers. Chemical shifts for protons are reported in parts per million downfield from tetramethylsilane and are referenced to residual protium in the NMR solvent ( $\text{CHCl}_3 = \delta$  7.26). Chemical shifts for carbon are reported in parts per million downfield from tetramethylsilane and are referenced to the carbon resonances. IR spectra were obtained from Thermo Scientific NICOLET 380 FT-IR (KCl card). HRMS were obtained on an Exactive Plus LC-MS (ESI) mass spectrometer with the use of a quadrupole analyzer. Cyclic voltammetry data were measured with a CHI 760E potentiostat (Chinstruments). All chemicals were purchased from *Innochem or Energy Chemical* and used as received.

Electrolysis experiments were performed using MESTEK DC power supply. Electrode clips (PT-1 or PT-3) and platinum plate (99.99%, 15\*15\*0.1 mm or 30\*30\*0.1 mm) were purchased from Gauss Union. The carbon cloth (CeTech WOS1002) was cut into 15 x 15 x 0.1 mm pieces before use, and was clamped between electrode clips.

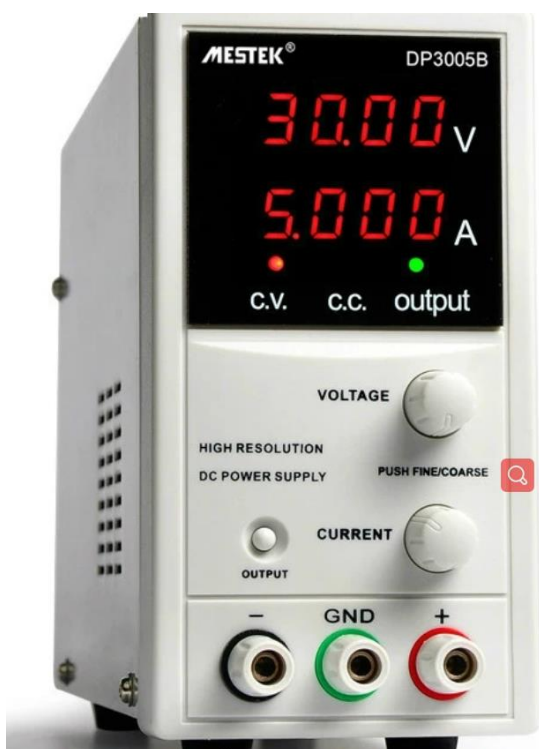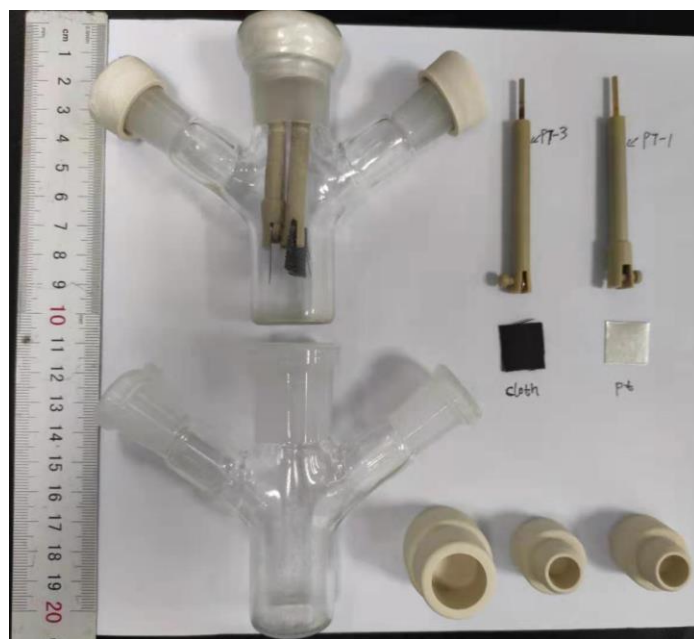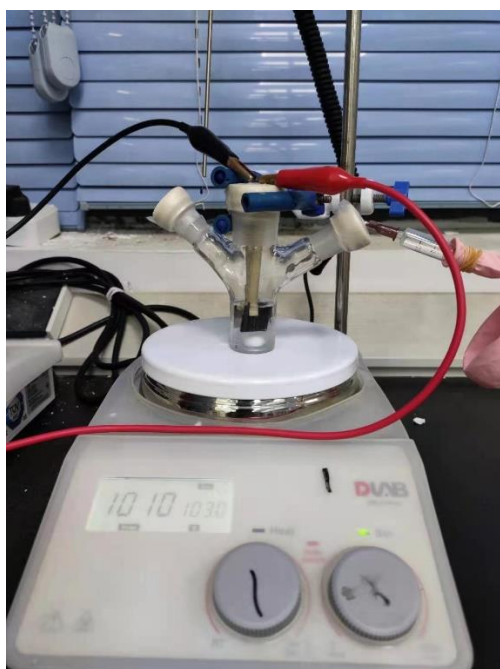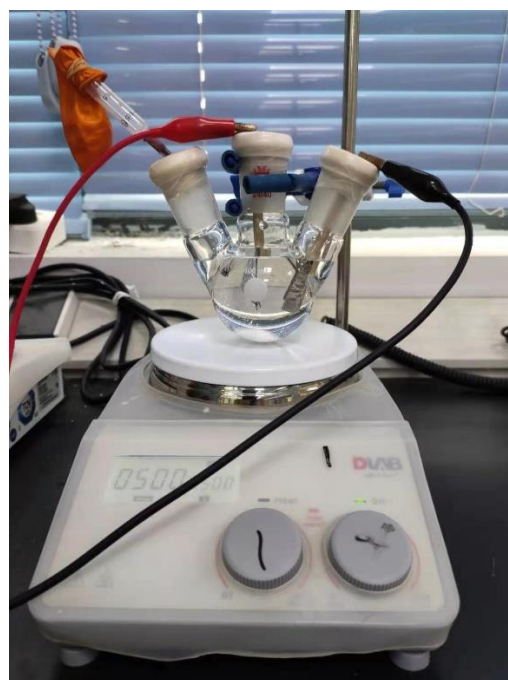

Figure S1. Electrolysis setups

## 2. General Procedures

### Method A: General procedure for the preparation of substituted 2-(phenylethynyl)-N-tosylbenzamides [1]

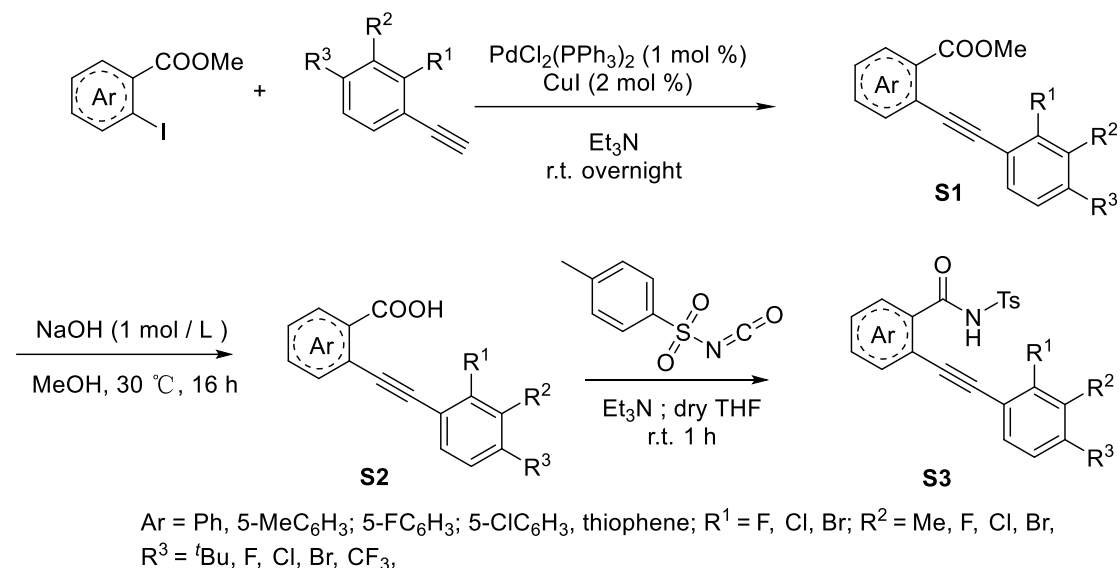

Step 1: To a solution of the methyl 2-iodobenzoate (10.0 mmol, 1.0 equiv.) in Et<sub>3</sub>N (30 mL), a terminal alkyne (12.0 mmol, 1.2 equiv.) and Pd(PPh<sub>3</sub>)<sub>2</sub>Cl<sub>2</sub> (0.1 mmol, 70 mg, 1 mol%) were added. After 5 min stirring at room temperature, CuI (0.2 mmol, 38 mg, 2 mol%) was added and the reaction mixture was stirred overnight. The reaction mixture was then filtered. The solvent was removed in *vacuo* and the crude residue was purified by flash chromatography on silica gel (300-400 mesh) to give **S1**.

Step 2: A 100 mL reaction flask was equipped with a magnetic stirring bar and charged with **S1** (5.0 mmol, 1.0 equiv.) in 30 mL MeOH. NaOH (1 N, 10 mL) was dropwise added to the solution through a dropping funnel. The reaction mixture was stirred at 30 °C for 16 h, then acidified by HCl (1 M). The resulting mixture was extracted by EtOAc (3 x 20 mL) and the combined organic layer was dried by Na<sub>2</sub>SO<sub>4</sub>, and then filtered. The solvent was removed in *vacuo* to afford **S2**, which was used without further purification.

Step 3: The carboxylic acid **S2** (5.0 mmol, 1.0 equiv) was dissolved in dry THF (38.0 mL) under argon and tosyl isocyanate (6.0 mmol, 1.2 equiv.) was added to this solution. After stirring at r.t. for 10 min, Et<sub>3</sub>N (6.0 mmol, 1.2 equiv.) was added dropwise to this flask, in which the formed CO<sub>2</sub> was released. After stirring for 1 h, the solution was diluted with an equal volume of EtOAc and washed with 1 M HCl and brine. After drying with Na<sub>2</sub>SO<sub>4</sub>, the organic phase was concentrated and the product **S3** was purified by recrystallization or flash chromatography.

**Method B: General procedure for the preparation of substituted 2-(phenylethynyl)-N-tosylbenzamides[2]**

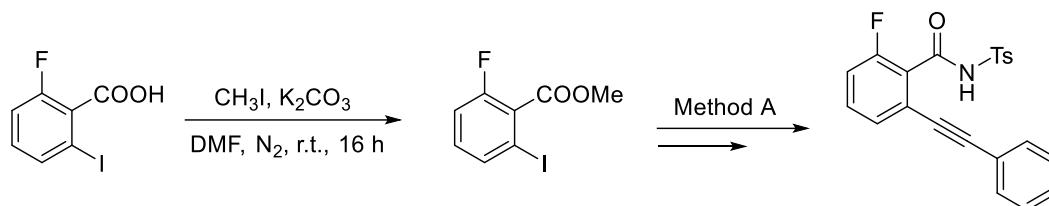

6-Fluoro-2-iodobenzoic acid (2.66 g, 10.0 mmol, 1.0 equiv.) and  $\text{K}_2\text{CO}_3$  (2.08 g, 15.0 mmol, 1.5 equiv.) were dissolved in DMF (100 ml) and stirred for 5 min.  $\text{CH}_3\text{I}$  (926  $\mu\text{l}$ , 15.0 mmol, 1.5 equiv.) was then added and the mixture was stirred for 16 h at room temperature under  $\text{N}_2$ . The reaction was diluted with EtOAc and then the organic layer was washed with  $\text{H}_2\text{O}$  and brine, dried over  $\text{Na}_2\text{SO}_4$ , and evaporated under vacuum to give the desired compound, which was used in the next steps without further purification.

**Method C: General procedure for the preparation of substituted 2-(phenylethynyl)-N-tosylbenzamides[3]**

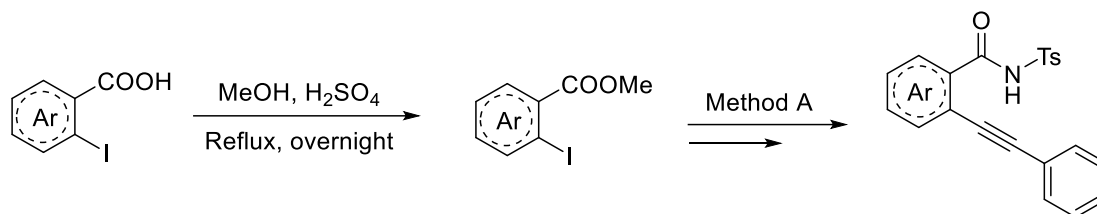

Ar = 4- $\text{ClC}_6\text{H}_3$ ; 5- $\text{OMeC}_6\text{H}_3$ ;

2-Iodobenzoic acid (10.0 mmol, 1.0 equiv.) was dissolved in MeOH (50 mL). Sulfuric acid (6.8 mL) was then slowly added and the mixture was stirred overnight and then heated at reflux. The reaction was cooled to room temperature, before diluting with diethyl ether. The organic layer was then washed with  $\text{H}_2\text{O}$  and brine, dried over  $\text{Na}_2\text{SO}_4$ , and evaporated under vacuum to give the desired compound, which was used in the next steps without further purification.

**Method D: General procedure for the preparation of substituted 2-(phenylethynyl)-N-tosylbenzamides[4]**

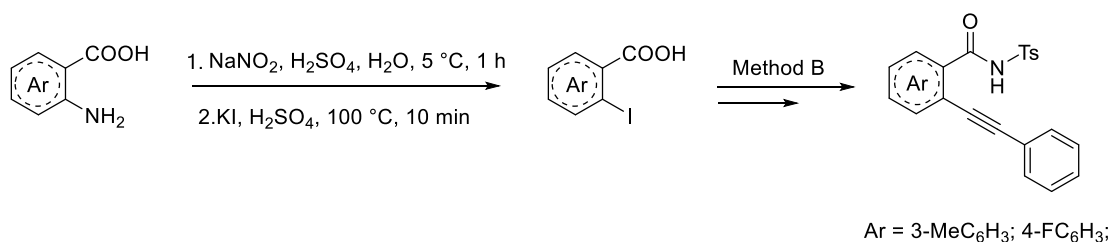

To a solution of anthranilic acid (10 mmol, 1.0 equiv) in water (1 M) was added concentrated sulfuric acid (25 mmol, 2.5 equiv.) at 5 °C and an aqueous solution of sodium nitrite (11 mmol, 1.1 equiv.) slowly. The resulting solution was stirred for 30 minutes before potassium iodide (15 mmol, 1.5 equiv.) in sulfuric acid (1 M) was added. The solution was then heated at 100 °C for 1 hour. The reaction was cooled to ambient temperature and the precipitate was filtered and washed with water. Further purification with column chromatography on silica gel or recrystallization provided 2-iodobenzamide.

#### Method E: Preparation of substituted N-methoxy-2-(phenylethynyl)benzamide[5]

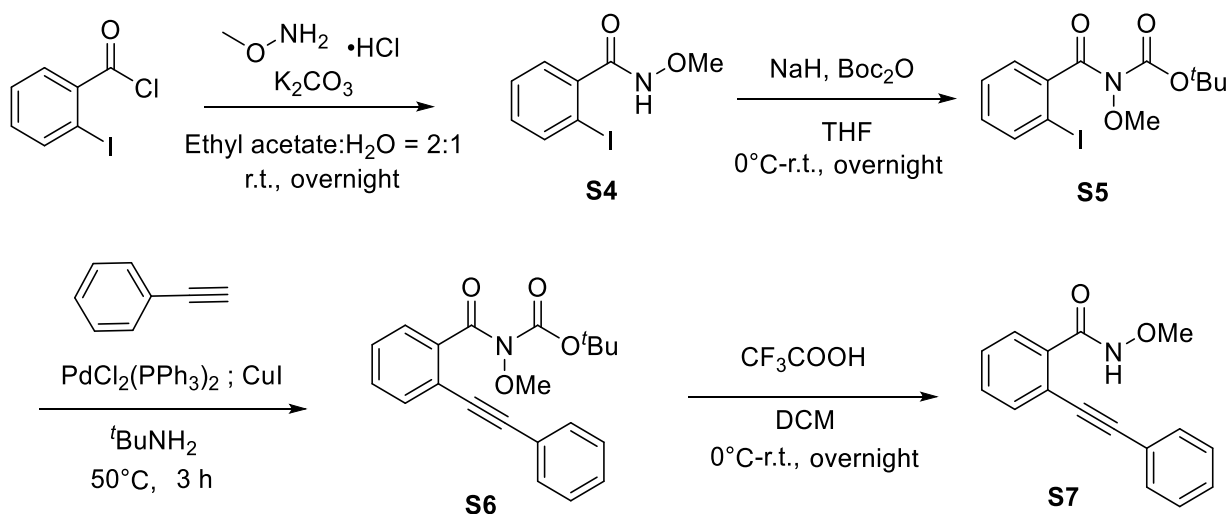

Step 1: To a solution of 2-iodobenzoyl chloride (4 g, 15.0 mmol, 1.0 equiv.) in EtOAc/H<sub>2</sub>O (v/v = 2:1, 180 mL) were added potassium carbonate (4.14 g, 30 mmol, 2.0 equiv.) and methoxylamine hydrochloride (1.5 g, 18.0 mmol, 1.2 equiv.). The mixture was stirred at room temperature overnight and then extracted with EtOAc (3 × 40 mL), washed with water (50 mL) and brine (50 mL), and dried over Na<sub>2</sub>SO<sub>4</sub>. Evaporation gave a crude solid that was recrystallized from EtOAc afforded 2-iodo-N-methoxybenzamide **S4** (white solid, 4.46 g, 84% yield).

Step 2: Sodium hydride (640 mg, 16 mmol, 1.1 equiv.) was added into a solution of 2-iodo-N-methoxybenzamide **S4** (4.05 g, 14.6 mmol, 1.0 equiv.) in dry THF (100

mL) at 0 °C. After that, Boc<sub>2</sub>O (3.83 g, 17.5 mmol, 1.2 equiv) was added slowly at 0 °C. The mixture was stirred at room temperature overnight and then quenched with saturated aqueous NH<sub>4</sub>Cl solution (30 mL). The mixture was extracted with EtOAc (3 × 30 mL), washed with saturated aqueous bicarbonate solution (30 mL) and brine (30 mL), and dried over Na<sub>2</sub>SO<sub>4</sub>. Using flash column chromatography, a white solid *tert*-butyl methoxy(2-(phenylethynyl)benzoyl)carbamate **S5** was obtained (4.80 g, 87% yield).

Step 3 and 4: To a solution of the above solid, *tert*-butyl methoxy(2-(phenylethynyl)benzoyl)carbamate **S5** (1.56 g, 4.4 mmol, 1.0 equiv.), in toluene (20 mL) were successively added PdCl<sub>2</sub>(PPh<sub>3</sub>)<sub>2</sub> (308.8 mg, 0.44 mmol, 10 mol%), CuI (41.9 mg, 0.22 mmol, 5 mol%), phenylacetylene (1.4 mL, 13.2 mmol, 3.0 equiv.), and *tert*-butylamine (0.93 mL, 8.8 mmol, 2.0 equiv.). The mixture was stirred at 50 °C in an oil bath for 3 h. Then the crude was filtrated by chromatography on silica gel (ether/ethyl acetate 50:1 to 20:1) to afford the crude product **S6**, to which trifluoroacetic acid (3 mL) in CH<sub>2</sub>Cl<sub>2</sub> (5 mL) was added at 0 °C. The crude mixture was purified by flash chromatography on silica gel to afford the pure product **S7** (0.905 g, 82%) as a white solid.

#### Method F: General procedure for the electrochemical cyclization reaction

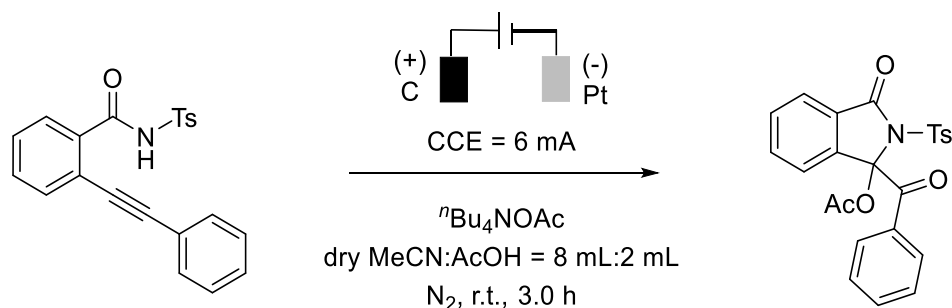

In an oven-dried undivided three-necked glassware (25 mL) equipped with a stirring bar, 2-(phenylethynyl)-N-tosylbenzamide (0.2 mmol, 1.0 equiv.) and *t*Bu<sub>4</sub>NOAc (0.2 mmol, 1.0 equiv.) were added. The glassware was equipped with carbon cloth (15 mm × 15 mm × 0.1 mm) as the anode and platinum plate (15 mm × 15 mm × 0.1 mm) as the cathode (Note: the electrodes need to be thoroughly dried before use). Under the protection of N<sub>2</sub>, MeCN and CH<sub>3</sub>CO<sub>2</sub>H = 8:2 (10 mL) were injected into the glassware *via* syringes. The reaction mixture was stirred and electrolyzed at a constant current of 6 mA at an ambient temperature for 3.0 h. The reaction mixture was concentrated *in vacuo*, and the crude residue was subjected to flash column chromatography on silica gel to yield the desired product.



### Method G: Scale-up synthesis

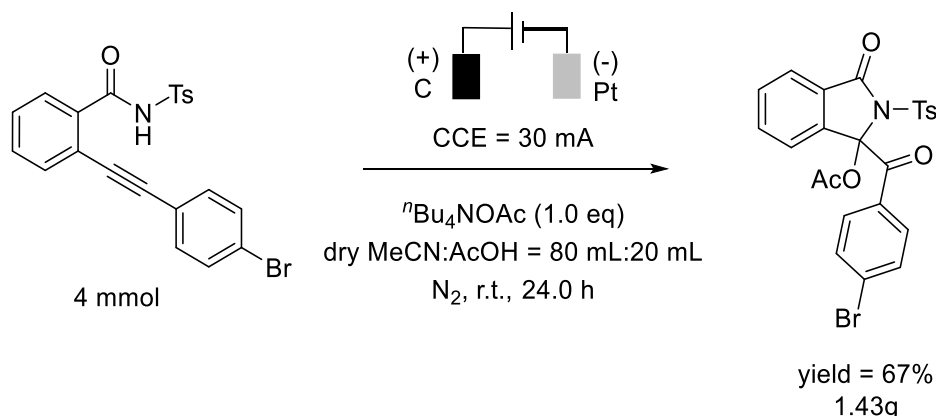

In an oven-dried undivided three-necked glassware (100 mL) equipped with a stirring bar, 2-((4-bromophenyl)ethynyl)-N-tosylbenzamide (1.82 g, 4 mmol, 1.0 equiv.) and  $n\text{Bu}_4\text{NOAc}$  (1.22 g, 4 mmol, 1.0 equiv.) were added. The glassware was equipped with carbon cloth (30 mm  $\times$  30 mm  $\times$  0.1 mm) as the anode and platinum plate (30 mm  $\times$  30 mm  $\times$  0.1 mm) as the cathode (Note: the electrodes needs to be thoroughly dried before use). Under the protection of  $\text{N}_2$ , MeCN and  $\text{CH}_3\text{CO}_2\text{H}$  = 80:20 (100 mL) were injected respectively into the glassware *via* syringes. The reaction mixture was stirred and electrolyzed at a constant current of 30 mA at an ambient temperature for 24.0 h. The reaction mixture was concentrated in vacuo, the crude residue was subjected to flash column chromatography on silica gel to give the desired product (67 % yield, 1.43 g).

### Method H: Preparation of 3-((4-bromophenyl)(hydroxy)methyl)isobenzofuran-1(3H)-one.[5]

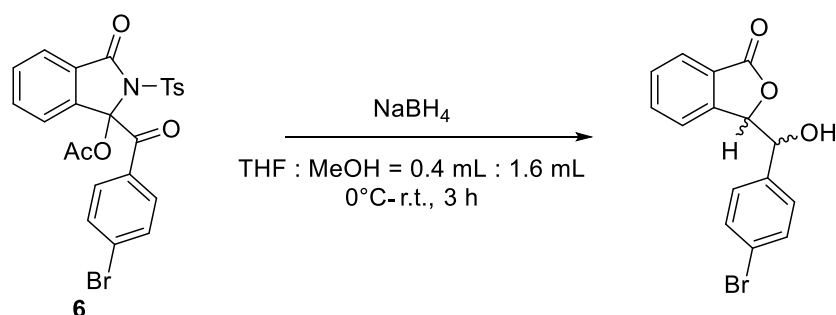

Compound **6** (52.8 mg, 0.1 mmol, 1.0 equiv.), THF and MeOH (2:8 v/v, 2 mL), and a stirring bar were added into a 10 mL bottom glassware. The reaction mixture was cooled to 0 °C, and then  $\text{NaBH}_4$  (9.1 mg, 0.24 mmol, 2.4 equiv.) was added. After stirring the reaction mixture at room temperature for 3 hours, an aqueous solution

saturated  $\text{NH}_4\text{Cl}$  (50 mL) was added, and then diluted with  $\text{H}_2\text{O}$  (50 mL) and  $\text{EtOAc}$  (100 mL). The aqueous layer was extracted with  $\text{EtOAc}$  ( $2 \times 50$  mL). The organic layers were combined, dried over anhydrous magnesium sulfate, and concentrated under reduced pressure. The crude product was purified using silica gel and a 1:5 v/v ethyl acetate: petroleum ether mixture as the eluent, and the product was obtained in a yield of 60% (dr = 1:1).

**Method I: Preparation of 3-(4-bromophenyl)-1*H*-isochromen-1-one.[6]**

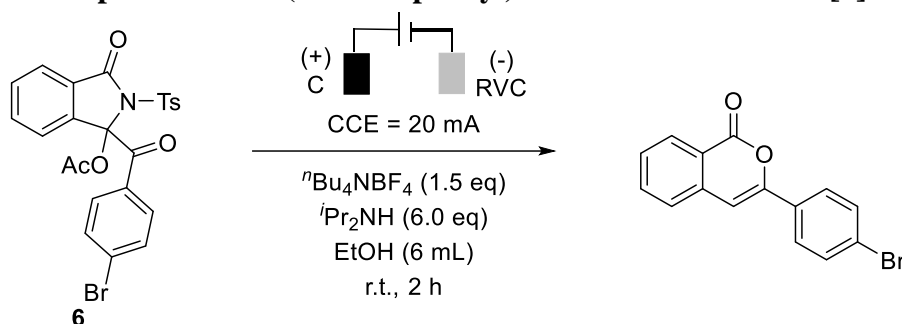

In an undivided three-necked glassware (10 mL) equipped with a stirring bar, **6** (105.6 mg, 0.2 mmol, 1.0 equiv.),  $n\text{Bu}_4\text{NBF}_4$  (98.8 mg, 0.3 mmol, 1.5 equiv.),  $i\text{Pr}_2\text{NH}$  (170  $\mu\text{L}$ , 1.2 mmol, 6.0 equiv.) and  $\text{EtOH}$  (6 mL) were added. The glassware was equipped with carbon cloth (15 mm  $\times$  15 mm  $\times$  0.1 mm) as the anode and RVC (10 mm  $\times$  10 mm  $\times$  5 mm) as the cathode. The reaction mixture was stirred and electrolyzed at a constant current of 20 mA at an ambient temperature for 2.0 h. The reaction mixture was concentrated *in vacuo*, the crude residue was subjected to flash column chromatography on silica gel to afford the product in a yield of 29%.

### 3. Characterization of Products

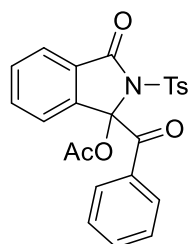

#### 2: 1-benzoyl-3-oxo-2-tosylisoindolin-1-yl acetate

Followed **Method F** ( $Q = 3.36$  F/mol), the desired product was purified using silica gel chromatography (petroleum ether/ethyl acetate = 10:1 - 5:1) to give 61.1 mg (68% yield) of **2** as a white solid.

**IR (neat,  $\text{cm}^{-1}$ ):** 3067 (w), 1750 (s), 1702 (m), 1596 (w), 1446 (w), 1367 (m), 1245 (s), 1170 (s), 1136 (s), 816 (w), 757 (m);  **$^1\text{H NMR}$  (500 MHz, Chloroform-*d*)**  $\delta$  7.89 (d,  $J = 8.5$  Hz, 2H), 7.87 (dd,  $J = 6.9, 1.9$  Hz, 1H), 7.78 (d,  $J = 6.6$  Hz, 2H), 7.61 – 7.53 (m, 3H), 7.44 – 7.37 (m, 3H), 7.28 (d,  $J = 7.8$  Hz, 2H), 2.40 (s, 3H), 2.09 (s, 3H);  **$^{13}\text{C NMR}$  (126 MHz, Chloroform-*d*)**  $\delta$  190.3, 167.8, 165.4, 145.8, 140.9, 135.2, 134.9, 134.8, 133.3, 131.4, 130.2, 129.6, 129.4, 129.1, 128.7, 125.4, 122.9, 94.7, 21.9, 21.8.

**HRMS (ESI)** calculated for  $\text{C}_{24}\text{H}_{19}\text{NNaO}_6\text{S}^+$  [ $\text{M}+\text{Na}^+$ ]: 472.0825; found:472.0824.

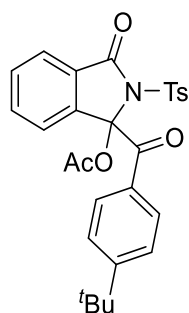

#### 3: 1-(4-(tert-butyl)benzoyl)-3-oxo-2-tosylisoindolin-1-yl acetate

Followed **Method F** ( $Q = 3.36$  F/mol), the desired product was purified using silica gel chromatography (petroleum ether/ethyl acetate = 10:1 - 5:1) to give 35.4 mg (35% yield) of **3** as a white solid.

**IR (neat,  $\text{cm}^{-1}$ ):** 2963 (w), 1752 (s), 1696 (m), 1602 (m), 1466 (w), 1367 (m), 1247 (s), 1171 (s), 1138 (m), 839 (w), 766 (w);  **$^1\text{H NMR}$  (500 MHz, Chloroform-*d*)**  $\delta$  7.91 – 7.87 (m, 3H), 7.76 (d,  $J = 8.2$  Hz, 2H), 7.57 (m, 2H), 7.45 (dd,  $J = 6.5, 1.5$  Hz, 1H), 7.42 (d,  $J = 8.6$  Hz, 2H), 7.27 (d,  $J = 7.5$  Hz, 2H), 2.40 (s, 3H), 2.11 (s, 3H), 1.32 (s, 9H);  **$^{13}\text{C NMR}$  (126 MHz, Chloroform-*d*)**  $\delta$  189.3, 167.9, 165.5, 157.3, 145.7, 141.2,

135.3, 134.7, 131.8, 131.3, 130.3, 129.8, 129.4, 129.2, 125.8, 125.4, 123.0, 94.8, 35.3, 31.1, 22.0, 21.8.

**HRMS (ESI)** calculated for  $C_{28}H_{27}NNaO_6S^+$  [ $M+Na^+$ ]: 528.1451; found:528.1449.

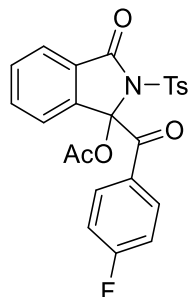

**4: 1-(4-fluorobenzoyl)-3-oxo-2-tosylisoindolin-1-yl acetate**

Followed **Method F** (reaction time = 3.5 h,  $Q = 3.92$  F/mol), the desired product was purified using silica gel chromatography (petroleum ether/ethyl acetate = 10:1 - 5:1) to give 63.6 mg (68% yield) of **4** as a white solid.

**IR (neat,  $cm^{-1}$ ):** 3071 (w), 1750 (s), 1699 (m), 1596 (s), 1467 (w), 1367 (m), 1243 (s), 1195 (s), 1161 (s), 1134 (s), 816 (m), 757 (m);  **$^1H$  NMR (500 MHz, Chloroform-*d*)**  $\delta$  7.94 (d,  $J = 8.4$  Hz, 2H), 7.90 – 7.87 (m, 1H), 7.87-7.84 (m, 2H), 7.63 – 7.53 (m, 2H), 7.40 (dd,  $J = 6.8, 2.2$  Hz, 1H), 7.31 (d,  $J = 8.1$  Hz, 2H), 7.09 (t,  $J = 8.6$  Hz, 2H), 2.42 (s, 3H), 2.09 (s, 3H);  **$^{13}C$  NMR (126 MHz, Chloroform-*d*)**  $\delta$  188.8, 167.7, 165.7 (d,  $J = 256.5$  Hz), 165.3, 145.9, 140.9, 135.2, 134.9, 132.5 (d,  $J = 9.3$  Hz), 131.5, 131.0 (d,  $J = 3.0$  Hz), 130.2, 129.5, 129.1, 125.6, 122.8, 116.0 (d,  $J = 21.8$  Hz), 94.7, 21.90, 21.86;  **$^{19}F$  NMR (471 MHz, Chloroform-*d*)**  $\delta$  -103.8 (m).

**HRMS (ESI)** calculated for  $C_{24}H_{18}FNNaO_6S^+$  [ $M+Na^+$ ]: 490.0731; found:490.0726.

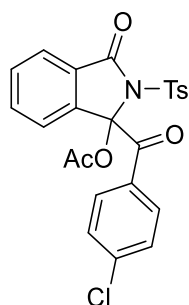

**5: 1-(4-chlorobenzoyl)-3-oxo-2-tosylisoindolin-1-yl acetate**

Followed **Method F** ( $Q = 3.36$  F/mol), the desired product was purified using silica gel chromatography (petroleum ether/ethyl acetate = 10:1 - 5:1) to give 74.5 mg (77% yield) of **5** as a white solid.

**IR (neat, cm<sup>-1</sup>):** 3068 (w), 1750 (s), 1702 (m), 1587 (m), 1466 (w), 1367 (m), 1245 (s), 1169 (s), 1136 (m), 818 (m), 762 (m), 729 (m); **<sup>1</sup>H NMR (500 MHz, Chloroform-*d*)**  $\delta$  7.92 (d, *J* = 8.4 Hz, 2H), 7.88 (dd, *J* = 6.5, 2.1 Hz, 1H), 7.73 (d, *J* = 8.3 Hz, 2H), 7.62 – 7.55 (m, 2H), 7.41 – 7.37 (m, 3H), 7.30 (d, *J* = 8.1 Hz, 2H), 2.42 (s, 3H), 2.08 (s, 3H); **<sup>13</sup>C NMR (126 MHz, Chloroform-*d*)**  $\delta$  189.3, 167.7, 165.2, 145.9, 140.8, 139.9, 135.1, 134.9, 133.0, 131.5, 131.1, 130.2, 129.5, 129.1, 129.0, 125.6, 122.8, 94.5, 21.9, 21.8. **HRMS (ESI)** calculated for C<sub>24</sub>H<sub>18</sub>ClNNaO<sub>6</sub>S<sup>+</sup> [M+Na<sup>+</sup>]: 506.0435; found:506.0436.

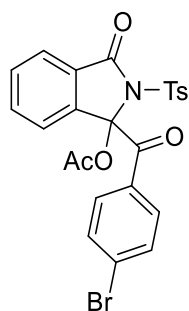

**6: 1-(4-bromobenzoyl)-3-oxo-2-tosylisoindolin-1-yl acetate**

Followed **Method F** (*Q* = 3.36 F/mol), the desired product was purified using silica gel chromatography (petroleum ether/ethyl acetate = 10:1 - 5:1) to give 78.2 mg (72% yield) of **6** as a white solid.

**IR (neat, cm<sup>-1</sup>):** 3067 (w), 1750 (s), 1703 (m), 1583 (m), 1466 (w), 1367 (m), 1245 (s), 1169 (s), 1134 (s), 817 (m), 761 (m), 661 (m); **<sup>1</sup>H NMR (500 MHz, Chloroform-*d*)**  $\delta$  7.91 (d, *J* = 8.4 Hz, 2H), 7.89 – 7.86 (m, 1H), 7.65 (d, *J* = 8.3 Hz, 2H), 7.62 – 7.56 (m, 2H), 7.56 – 7.52 (m, 2H), 7.39 (dd, *J* = 6.4, 1.2 Hz, 1H), 7.30 (d, *J* = 7.8 Hz, 2H), 2.41 (s, 3H), 2.07 (s, 3H); **<sup>13</sup>C NMR (126 MHz, Chloroform-*d*)**  $\delta$  189.6, 167.6, 165.2, 145.9, 140.7, 135.1, 134.9, 133.5, 132.0, 131.5, 131.1, 130.1, 129.5, 129.0, 128.6, 125.5, 122.7, 94.5, 21.8, 21.8.

**HRMS (ESI)** calculated for C<sub>24</sub>H<sub>18</sub>BrNNaO<sub>6</sub>S<sup>+</sup> [M+Na<sup>+</sup>]: 549.9930; found:549.9927.

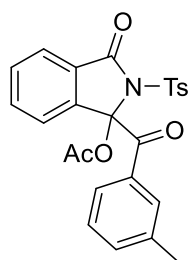

**7: 1-(3-methylbenzoyl)-3-oxo-2-tosylisoindolin-1-yl acetate**

Followed **Method F** ( $Q = 3.36$  F/mol), the desired product was purified using silica gel chromatography (petroleum ether/ethyl acetate = 10:1 - 5:1) to give 55.6 mg (60% yield) of **7** as a white solid.

**IR (neat,  $\text{cm}^{-1}$ ):** 3062 (w), 1752 (s), 1701 (m), 1599 (m), 1466 (w), 1368 (m), 1249 (s), 1170 (s), 1134 (s), 815 (w), 754 (m);  **$^1\text{H}$  NMR (500 MHz, Chloroform-*d*)**  $\delta$  7.95 – 7.82 (m, 3H), 7.65 (s, 1H), 7.57 (m, 2H), 7.53 (d,  $J = 7.8$  Hz, 1H), 7.40 (dd,  $J = 21.0, 7.4$  Hz, 2H), 7.28 (d,  $J = 8.2$  Hz, 3H), 2.41 (s, 3H), 2.36 (s, 3H), 2.10 (s, 3H);  **$^{13}\text{C}$  NMR (126 MHz, Chloroform-*d*)**  $\delta$  190.4, 167.8, 165.4, 145.7, 141.1, 138.6, 135.3, 134.8, 134.8, 134.1, 131.3, 130.5, 130.3, 129.4, 129.2, 128.5, 126.6, 125.4, 122.9, 94.8, 21.93, 21.85, 21.5.

**HRMS (ESI)** calculated for  $\text{C}_{25}\text{H}_{21}\text{NNaO}_6\text{S}^+$  [ $\text{M}+\text{Na}^+$ ]: 486.0981; found:486.0978.

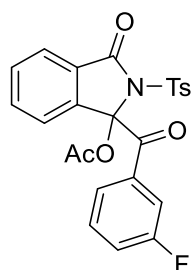

### **8: 1-(3-fluorobenzoyl)-3-oxo-2-tosylisoindolin-1-yl acetate**

Followed **Method F** (reaction time = 5 h,  $Q = 5.60$  F/mol), the desired product was purified using silica gel chromatography (petroleum ether/ethyl acetate = 10:1 - 5:1) to give 71.1 mg (76% yield) of **8** as a white solid.

**IR (neat,  $\text{cm}^{-1}$ ):** 3073 (w), 1752 (s), 1708 (m), 1586 (m), 1467 (w), 1367 (m), 1247 (s), 1205 (s), 1170 (s), 1128 (s), 815 (m), 756 (m);  **$^1\text{H}$  NMR (500 MHz, Chloroform-*d*)**  $\delta$  7.94 (d,  $J = 8.5$  Hz, 2H), 7.90 – 7.84 (m, 1H), 7.68 – 7.48 (m, 4H), 7.44 – 7.35 (m, 2H), 7.30 (d,  $J = 8.2$  Hz, 2H), 7.29 – 7.24 (m, 1H), 2.41 (s, 3H), 2.08 (s, 3H);  **$^{13}\text{C}$  NMR (126 MHz, Chloroform-*d*)**  $\delta$  189.5, 167.6, 165.1, 162.4 (d,  $J = 248.2$  Hz), 145.9, 140.7, 136.6 (d,  $J = 7.0$  Hz), 135.1, 134.9, 131.5, 130.4 (d,  $J = 7.8$  Hz), 130.1, 129.5, 128.9, 125.5, 125.2 (d,  $J = 3.0$  Hz), 122.6, 120.4 (d,  $J = 21.1$  Hz), 116.8 (d,  $J = 23.6$  Hz), 94.6, 21.8, 21.8;  **$^{19}\text{F}$  NMR (471 MHz, Chloroform-*d*)**  $\delta$  -110.9 (m).

**HRMS (ESI)** calculated for  $\text{C}_{24}\text{H}_{18}\text{FNNaO}_6\text{S}^+$  [ $\text{M}+\text{Na}^+$ ]: 490.0731; found: 490.0729.

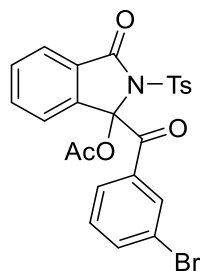

**9: 1-(3-bromobenzoyl)-3-oxo-2-tosylisoindolin-1-yl acetate**

Followed **Method F** (reaction time = 5 h,  $Q = 5.60$  F/mol), the desired product was purified using silica gel chromatography (petroleum ether/ethyl acetate = 10:1 - 5:1) to give 82.4 mg (78% yield) of **9** as a white solid.

**IR (neat,  $\text{cm}^{-1}$ ):** 3067 (w), 1751 (s), 1707 (m), 1597 (w), 1467 (w), 1367 (m), 1239 (s), 1169 (s), 1136 (s), 815 (m), 763 (m), 661 (s);  **$^1\text{H NMR}$  (500 MHz, Chloroform-*d*)**  $\delta$  8.04 (t,  $J = 1.8$  Hz, 1H), 7.94 (d,  $J = 8.4$  Hz, 2H), 7.87 (dd,  $J = 6.6, 1.4$  Hz, 1H), 7.71 – 7.66 (m, 2H), 7.63 – 7.54 (m, 2H), 7.37 (d,  $J = 6.9$  Hz, 1H), 7.33 – 7.26 (m, 3H), 2.42 (s, 3H), 2.09 (s, 3H);  **$^{13}\text{C NMR}$  (126 MHz, Chloroform-*d*)**  $\delta$  189.7, 167.5, 165.1, 145.9, 140.7, 136.6, 136.1, 135.1, 134.9, 132.9, 131.5, 130.2, 130.1, 129.5, 129.0, 128.0, 125.6, 122.8, 122.5, 94.6, 21.9, 21.9.

**HRMS (ESI)** calculated for  $\text{C}_{24}\text{H}_{18}\text{BrNNaO}_6\text{S}^+$  [ $\text{M}+\text{Na}^+$ ]: 549.9930; found:549.9927.

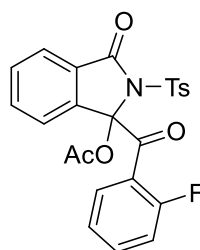

**10: 1-(2-fluorobenzoyl)-3-oxo-2-tosylisoindolin-1-yl acetate**

Followed **Method F** (reaction time = 5 h,  $Q = 5.60$  F/mol), the desired product was purified using silica gel chromatography (petroleum ether/ethyl acetate = 10:1 - 5:1) to give 68.3 mg (73% yield) of **10** as a white solid.

**IR (neat,  $\text{cm}^{-1}$ ):** 3069 (w), 1751 (s), 1714 (m), 1610 (m), 1467 (w), 1367 (m), 1246 (s), 1195 (s), 1169 (s), 1136 (s), 815 (w), 757 (m);  **$^1\text{H NMR}$  (500 MHz, Chloroform-*d*)**  $\delta$  7.94 (d,  $J = 8.5$  Hz, 2H), 7.87 – 7.81 (m, 1H), 7.76 (td,  $J = 7.7, 1.7$  Hz, 1H), 7.65 – 7.60 (m, 1H), 7.59 – 7.53 (m, 3H), 7.33 – 7.26 (m, 3H), 7.18 – 7.14 (m, 1H), 2.42 (s, 3H), 2.02 (s, 3H);  **$^{13}\text{C NMR}$  (126 MHz, Chloroform-*d*)**  $\delta$  192.1, 167.6, 165.4, 159.7 (d,  $J = 253.2$  Hz), 145.8, 140.9, 135.2, 134.7, 134.2 (d,  $J = 8.8$  Hz), 131.9, 131.2, 130.5, 129.6, 129.0, 125.3, 125.0 (d,  $J = 14.3$  Hz), 124.4 (d,  $J = 3.4$  Hz), 122.3 (d,  $J = 7.3$  Hz),

116.3 (d,  $J = 22.7$  Hz), 94.1, 21.9, 21.7;  $^{19}\text{F}$  NMR (471 MHz, Chloroform-*d*)  $\delta$  -109.2 (m).

HRMS (ESI) calculated for  $\text{C}_{24}\text{H}_{18}\text{FNNaO}_6\text{S}^+$  [ $\text{M}+\text{Na}^+$ ]: 490.0731; found:490.0728.

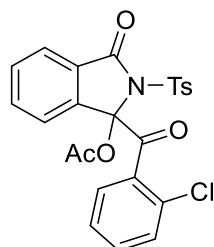

### 11: 1-(2-chlorobenzoyl)-3-oxo-2-tosylisoindolin-1-yl acetate

Followed **Method F** (reaction time = 5 h,  $Q = 5.60$  F/mol), the desired product was purified using silica gel chromatography (petroleum ether/ethyl acetate = 10:1 - 5:1) to give 69.7 mg (72% yield) of **11** as a white solid.

**IR** (neat,  $\text{cm}^{-1}$ ): 3070 (w), 1751 (s), 1723 (m), 1592 (w), 1467 (w), 1367 (m), 1246 (s), 1170 (s), 1140 (s), 815 (m), 769 (m), 740 (w);  **$^1\text{H}$  NMR** (500 MHz, Chloroform-*d*)  $\delta$  8.08 – 7.98 (m, 3H), 7.82 (d,  $J = 7.5$  Hz, 1H), 7.60 (td,  $J = 7.5, 1.3$  Hz, 1H), 7.56 – 7.52 (m, 2H), 7.48 (td,  $J = 7.7, 1.7$  Hz, 1H), 7.39 (td,  $J = 7.5, 1.4$  Hz, 1H), 7.34 (t,  $J = 8.1$  Hz, 3H), 2.43 (s, 3H), 2.08 (s, 3H);  **$^{13}\text{C}$  NMR** (126 MHz, Chloroform-*d*)  $\delta$  191.4, 167.3, 165.3, 145.9, 140.5, 135.14, 135.06, 134.5, 132.5, 132.1, 131.3, 131.0, 130.7, 129.7, 129.5, 129.4, 126.1, 125.3, 122.4, 94.9, 21.9, 21.7.

HRMS (ESI) calculated for  $\text{C}_{24}\text{H}_{18}\text{ClINNaO}_6\text{S}^+$  [ $\text{M}+\text{Na}^+$ ]: 506.0435; found:506.0431.

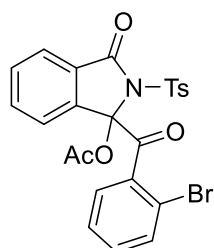

### 12: 1-(2-bromobenzoyl)-3-oxo-2-tosylisoindolin-1-yl acetate

Followed **Method F** (reaction time = 5 h,  $Q = 5.60$  F/mol), the desired product was purified using silica gel chromatography (petroleum ether/ethyl acetate = 10:1 - 5:1) to give 76.1 mg (72% yield) of **12** as a white solid.

**IR** (neat,  $\text{cm}^{-1}$ ): 3066 (w), 1751 (s), 1722 (m), 1596 (w), 1466 (w), 1366 (m), 1245 (m), 1168 (s), 1141 (s), 815 (w), 769 (w), 658 (s);  **$^1\text{H}$  NMR** (500 MHz, Chloroform-



**d**)  $\delta$  8.07 (dd,  $J = 7.7, 1.9$  Hz, 1H), 8.01 (d,  $J = 8.3$  Hz, 2H), 7.81 (d,  $J = 7.5$  Hz, 1H), 7.73 (dd,  $J = 7.9, 1.3$  Hz, 1H), 7.59 (td,  $J = 7.6, 1.3$  Hz, 1H), 7.53 (t,  $J = 7.4$  Hz, 1H), 7.45 (td,  $J = 7.6, 1.4$  Hz, 1H), 7.40 (td,  $J = 7.7, 1.8$  Hz, 1H), 7.36 (d,  $J = 7.6$  Hz, 1H), 7.33 (d,  $J = 8.2$  Hz, 2H), 2.42 (s, 3H), 2.08 (s, 3H);  $^{13}\text{C}$  NMR (126 MHz, Chloroform-*d*)  $\delta$  191.8, 167.3, 165.3, 145.9, 140.5, 136.9, 135.1, 134.5, 134.4, 132.7, 131.3, 131.0, 129.7, 129.5, 129.4, 126.6, 125.3, 122.7, 121.0, 94.8, 21.9, 21.8.

**HRMS (ESI)** calculated for  $\text{C}_{24}\text{H}_{18}\text{BrNNaO}_6\text{S}^+$  [ $\text{M}+\text{Na}^+$ ]: 549.9930; found:549.9931.

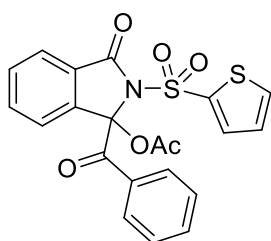

### **13: 1-benzoyl-3-oxo-2-(thiophen-2-ylsulfonyl)isoindolin-1-yl acetate**

Followed **Method F** ( $Q = 3.36$  F/mol), the desired product was purified using silica gel chromatography (petroleum ether/ethyl acetate = 10:1 - 5:1) to give 45.0 mg (51% yield) of **13** as a white solid.

**IR** (neat,  $\text{cm}^{-1}$ ): 3102 (w), 3064 (w), 1750 (s), 1700 (m), 1596 (w), 1466 (w), 1368 (m), 1244 (s), 1170 (s), 1133 (s), 754 (m), 724 (s);  $^1\text{H}$  NMR (500 MHz, Chloroform-*d*)  $\delta$  7.92 – 7.89 (m, 1H), 7.86 (dd,  $J = 3.9, 1.4$  Hz, 1H), 7.81 – 7.77 (m, 2H), 7.69 (dd,  $J = 5.0, 1.4$  Hz, 1H), 7.63 – 7.53 (m, 3H), 7.46 – 7.36 (m, 3H), 7.07 (dd,  $J = 5.0, 3.9$  Hz, 1H), 2.12 (s, 3H);  $^{13}\text{C}$  NMR (126 MHz, Chloroform-*d*)  $\delta$  190.0, 167.8, 165.2, 140.9, 138.2, 136.1, 135.1, 134.9, 134.6, 133.4, 131.4, 130.0, 129.7, 128.7, 127.4, 125.5, 122.8, 94.9, 21.9.

**HRMS (ESI)** calculated for  $\text{C}_{21}\text{H}_{15}\text{NNaO}_6\text{S}_2^+$  [ $\text{M}+\text{Na}^+$ ]: 464.0233; found: 464.0243.

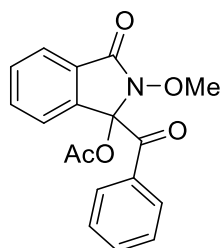

### **14: 1-benzoyl-2-methoxy-3-oxoisoindolin-1-yl acetate**

Followed **Method F** (current = 5 mA, Q = 2.80 F/mol), the desired product was purified using silica gel chromatography (petroleum ether/ethyl acetate = 10:1 - 5:1) to give 19.5 mg (30% yield) of **14** as a white solid.

**IR (neat, cm<sup>-1</sup>):** 3068 (w), 1736 (s), 1694 (s), 1596 (w), 1467 (m), 1369 (m), 1239 (m), 1198 (s), 758 (m).

**<sup>1</sup>H NMR (500 MHz, Chloroform-*d*)**  $\delta$  7.92 – 7.88 (m, 1H), 7.71 – 7.68 (m, 2H), 7.68 – 7.65 (m, 1H), 7.61 – 7.54 (m, 2H), 7.52 – 7.48 (m, 1H), 7.37 – 7.33 (m, 2H), 3.89 (s, 3H), 2.17 (s, 3H); **<sup>13</sup>C NMR (126 MHz, Chloroform-*d*)**  $\delta$  189.7, 169.7, 165.9, 139.5, 134.8, 133.7, 133.4, 131.2, 128.94, 128.87, 128.7, 126.1, 124.5, 94.0, 65.5, 21.4.

**HRMS (ESI)** calculated for C<sub>18</sub>H<sub>15</sub>NNaO<sub>5</sub><sup>+</sup> [M+Na<sup>+</sup>]: 348.0842; found:348.0841.

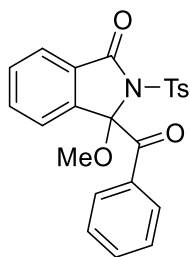

### **15: 3-benzoyl-3-methoxy-2-tosylisoindolin-1-one**

Followed **Method F** (with MeCN : MeOH = 5 mL: 5 mL, Q = 3.36 F/mol), the desired product was purified using silica gel chromatography (petroleum ether/ethyl acetate = 10:1 - 5:1) to give 21.9 mg (26% yield) of **15** as a white solid.

**IR (neat, cm<sup>-1</sup>):** 3062 (w), 1687 (s), 1597 (w), 1443 (w), 1359 (s), 1294 (s), 1170 (s), 1088 (m), 763 (m), 730 (m); **<sup>1</sup>H NMR (500 MHz, Chloroform-*d*)**  $\delta$  7.83 – 7.80 (m, 2H), 7.54 – 7.52 (m, 1H), 7.46 – 7.29 (m, 8H), 7.17 – 7.15 (m, 2H), 3.35 (s, 3H), 2.35 (s, 3H); **<sup>13</sup>C NMR (126 MHz, Chloroform-*d*)**  $\delta$  169.8, 144.9, 138.0, 135.6, 132.4, 131.9, 130.1, 129.6, 128.9, 128.5, 128.44, 128.40, 127.3, 122.6, 120.6, 93.8, 86.0, 34.3, 21.7.

**HRMS (ESI)** calculated for C<sub>23</sub>H<sub>19</sub>NNaO<sub>5</sub>S<sup>+</sup> [M+Na<sup>+</sup>]: 444.0876; found:444.0873.

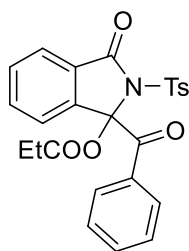

### 16: 1-benzoyl-3-oxo-2-tosylisoindolin-1-yl propionate

Followed **Method F** (with MeCN : propionic acid = 8 mL: 2 mL, Q = 3.36 F/mol), the desired product was purified using silica gel chromatography (petroleum ether/ethyl acetate = 10:1 - 5:1) to give 59.3 mg (64% yield) of **16** as a white solid.

**IR (neat, cm<sup>-1</sup>):** 3064 (w), 1750 (s), 1702 (m), 1596 (m), 1466 (w), 1368 (m), 1245 (s), 1169 (s), 1141 (s), 815 (w), 756 (m); **<sup>1</sup>H NMR (500 MHz, Chloroform-*d*)**  $\delta$  7.90 (d, *J* = 8.2 Hz, 2H), 7.88 – 7.85 (m, 1H), 7.80 (d, *J* = 7.8 Hz, 2H), 7.60 – 7.52 (m, 3H), 7.41 (t, *J* = 7.7 Hz, 3H), 7.27 (d, *J* = 8.3 Hz, 2H), 2.46 – 2.41 (m, 2H), 2.40 (s, 3H), 0.99 (t, *J* = 7.5 Hz, 3H); **<sup>13</sup>C NMR (126 MHz, Chloroform-*d*)**  $\delta$  190.6, 171.4, 165.4, 145.7, 141.1, 135.2, 134.78, 134.83, 133.2, 131.3, 130.2, 129.6, 129.4, 129.0, 128.6, 125.4, 122.7, 94.7, 28.2, 21.8, 8.4.

**HRMS (ESI)** calculated for C<sub>25</sub>H<sub>21</sub>NNaO<sub>6</sub>S<sup>+</sup> [M+Na<sup>+</sup>]: 486.0981; found:486.0992.

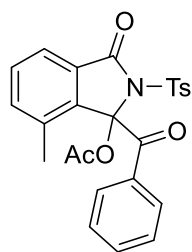

### 17: 1-benzoyl-7-methyl-3-oxo-2-tosylisoindolin-1-yl acetate

Followed **Method F** (reaction time = 5 h, Q = 5.60 F/mol), the desired product was purified using silica gel chromatography (petroleum ether/ethyl acetate = 10:1 - 5:1) to give 38.9 mg (42% yield) of **17** as a white solid.

**IR (neat, cm<sup>-1</sup>):** 3061 (w), 1751 (s), 1708 (m), 1596 (w), 1446 (w), 1367 (m), 1248 (m), 1174 (s), 1150 (s), 814 (w), 758 (m); **<sup>1</sup>H NMR (500 MHz, Chloroform-*d*)**  $\delta$  7.79 (d, *J* = 8.4 Hz, 2H), 7.74 (d, *J* = 7.5 Hz, 1H), 7.64 (d, *J* = 6.9 Hz, 2H), 7.53 – 7.49 (m, 1H), 7.47 (t, *J* = 7.5 Hz, 1H), 7.37 (d, *J* = 7.6 Hz, 1H), 7.35 – 7.31 (m, 2H), 7.24 (d, *J* = 8.2 Hz, 2H), 2.38 (s, 3H), 2.20 (s, 3H), 2.06 (s, 3H); **<sup>13</sup>C NMR (126 MHz, Chloroform-*d*)**  $\delta$  190.0, 167.7, 165.7, 145.7, 138.4, 137.2, 135.4, 135.1, 134.0, 133.1, 131.4, 130.8, 129.5, 129.4, 128.7, 128.6, 123.0, 94.0, 21.8, 21.6, 17.5.

**HRMS (ESI)** calculated for C<sub>25</sub>H<sub>21</sub>NNaO<sub>6</sub>S<sup>+</sup> [M+Na<sup>+</sup>]: 486.0981; found:486.0992.

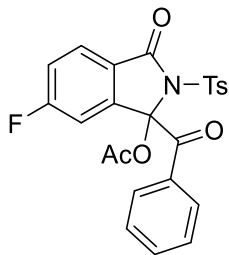

**18: 1-benzoyl-6-fluoro-3-oxo-2-tosylisoindolin-1-yl acetate**

Followed **Method F** (reaction time = 5 h,  $Q = 5.60$  F/mol), the desired product was purified using silica gel chromatography (petroleum ether/ethyl acetate = 10:1 - 5:1) to give 59.8 mg (64% yield) of **18** as a white solid.

**IR (neat,  $\text{cm}^{-1}$ ):** 3071 (w), 1754 (s), 1702 (m), 1608 (m), 1446 (w), 1368 (m), 1270 (s), 1204 (s), 1174 (s), 1126 (s), 816 (m), 763 (m);  **$^1\text{H NMR}$  (500 MHz, Chloroform-*d*)**  $\delta$  7.92 – 7.89 (m, 2H), 7.87 (dd,  $J = 8.4, 4.7$  Hz, 1H), 7.83 (d,  $J = 7.1$  Hz, 2H), 7.62 – 7.57 (m, 1H), 7.46 – 7.42 (m, 2H), 7.29 (d,  $J = 7.7$  Hz, 2H), 7.23 (td,  $J = 8.6, 2.2$  Hz, 1H), 7.10 (dd,  $J = 7.5, 2.2$  Hz, 1H), 2.41 (s, 3H), 2.12 (s, 3H);  **$^{13}\text{C NMR}$  (126 MHz, Chloroform-*d*)**  $\delta$  189.9, 167.8, 166.5 (d,  $J = 257.9$  Hz), 164.2, 145.9, 143.6 (d,  $J = 9.8$  Hz), 135.1, 134.5, 133.5, 129.7, 129.5, 129.1, 128.8, 127.8 (d,  $J = 10.0$  Hz), 126.2 (d,  $J = 2.4$  Hz), 119.1 (d,  $J = 23.5$  Hz), 110.8 (d,  $J = 25.5$  Hz), 94.0, 21.8, 21.8;  **$^{19}\text{F NMR}$  (471 MHz, Chloroform-*d*)**  $\delta$  -100.1 (m).

**HRMS (ESI)** calculated for  $\text{C}_{24}\text{H}_{18}\text{FNNaO}_6\text{S}^+$  [ $\text{M}+\text{Na}^+$ ]: 490.0731; found:490.0741.

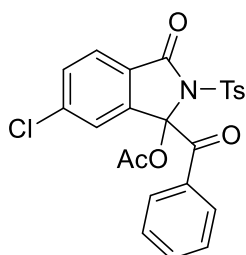

**19: 1-benzoyl-6-chloro-3-oxo-2-tosylisoindolin-1-yl acetate**

Followed **Method F** (reaction time = 5 h,  $Q = 5.60$  F/mol), the desired product was purified using silica gel chromatography (petroleum ether/ethyl acetate = 10:1 - 5:1) to give 68.7 mg (71% yield) of **19** as a white solid.

**IR (neat,  $\text{cm}^{-1}$ ):** 3070 (w), 1753 (s), 1701 (m), 1596 (m), 1447 (w), 1368 (m), 1243 (s), 1171 (s), 1140 (s), 949 (w), 909 (m), 815 (w), 772 (w), 729 (m);  **$^1\text{H NMR}$  (500 MHz, Chloroform-*d*)**  $\delta$  7.91 – 7.87 (m, 2H), 7.84 – 7.81 (m, 2H), 7.80 (d,  $J = 8.3$  Hz, 1H), 7.63 – 7.58 (m, 1H), 7.53 (dd,  $J = 8.2, 1.7$  Hz, 1H), 7.47 – 7.43 (m, 2H), 7.38 (d,  $J =$

1.7 Hz, 1H), 7.32 – 7.27 (m, 2H), 2.42 (s, 3H), 2.12 (s, 3H); <sup>13</sup>C NMR (126 MHz, Chloroform-*d*) δ 190.1, 167.8, 164.4, 146.0, 142.7, 141.3, 135.0, 134.6, 133.6, 131.9, 129.8, 129.5, 129.2, 128.8, 128.7, 126.6, 123.2, 94.0, 21.9, 21.9.

HRMS (ESI) calculated for C<sub>24</sub>H<sub>18</sub>ClNNaO<sub>6</sub>S<sup>+</sup> [M+Na<sup>+</sup>]: 506.0435; found:506.0436.

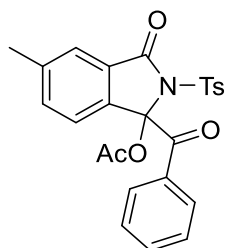

### 20: 1-benzoyl-5-methyl-3-oxo-2-tosylisoindolin-1-yl acetate

Followed **Method F** (Q = 3.36 F/mol), the desired product was purified using silica gel chromatography (petroleum ether/ethyl acetate = 10:1 - 5:1) to give 64.0 mg (69% yield) of **20** as a white solid.

**IR** (neat, cm<sup>-1</sup>): 3063 (w), 1752 (s), 1701 (m), 1596 (w), 1446 (w), 1366 (m), 1253 (s), 1164 (s), 1118 (m), 815 (m), 733 (m); **<sup>1</sup>H NMR** (500 MHz, Chloroform-*d*) δ 7.88 (d, *J* = 8.5 Hz, 2H), 7.75 (d, *J* = 7.4 Hz, 2H), 7.67 (s, 1H), 7.58 – 7.51 (m, 1H), 7.39 (t, *J* = 7.7 Hz, 3H), 7.31 (d, *J* = 7.9 Hz, 1H), 7.27 (d, *J* = 8.3 Hz, 2H), 2.41 (s, 3H), 2.40 (s, 3H), 2.08 (s, 3H); **<sup>13</sup>C NMR** (126 MHz, Chloroform-*d*) δ 190.3, 167.9, 165.5, 145.7, 142.1, 138.1, 135.7, 135.3, 134.8, 133.2, 130.3, 129.6, 129.4, 129.0, 128.6, 125.7, 122.8, 94.6, 21.9, 21.8, 21.6.

HRMS (ESI) calculated for C<sub>25</sub>H<sub>21</sub>NNaO<sub>6</sub>S<sup>+</sup> [M+Na<sup>+</sup>]: 486.0981; found:486.0982.

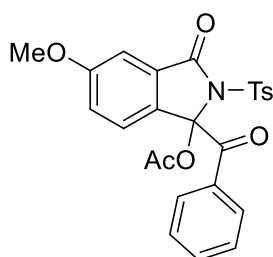

### 21: 1-benzoyl-5-methoxy-3-oxo-2-tosylisoindolin-1-yl acetate

Followed **Method F** (Q = 3.36 F/mol), the desired product was purified using silica gel chromatography (petroleum ether/ethyl acetate = 10:1 - 5:1) to give 68.1 mg (71% yield) of **21** as a white solid.

**IR (neat, cm<sup>-1</sup>):** 3070 (w), 1750 (s), 1702 (m), 1596 (m), 1447 (w), 1367 (m), 1257 (s), 1169 (s), 1126 (m), 816 (w), 763 (w); **<sup>1</sup>H NMR (500 MHz, Chloroform-*d*)**  $\delta$  7.87 (d,  $J = 8.4$  Hz, 2H), 7.73 (d,  $J = 6.6$  Hz, 2H), 7.56 – 7.51 (m, 1H), 7.41 – 7.36 (m, 2H), 7.35 – 7.32 (m, 2H), 7.27 (d,  $J = 7.9$  Hz, 2H), 7.09 (dd,  $J = 8.5, 2.5$  Hz, 1H), 3.82 (s, 3H), 2.40 (s, 3H), 2.08 (s, 3H); **<sup>13</sup>C NMR (126 MHz, Chloroform-*d*)**  $\delta$  190.0, 168.0, 165.3, 162.2, 145.7, 135.2, 134.7, 133.2, 132.6, 131.9, 129.5, 129.4, 129.0, 128.7, 124.4, 122.1, 108.7, 94.6, 55.9, 21.9, 21.8.

**HRMS (ESI)** calculated for C<sub>25</sub>H<sub>21</sub>NNaO<sub>7</sub>S<sup>+</sup> [M+Na<sup>+</sup>]: 502.0931; found:502.0942.

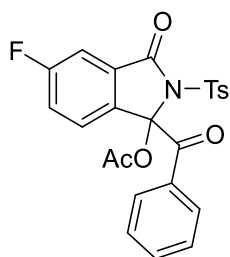

## **22: 1-benzoyl-5-fluoro-3-oxo-2-tosylisoindolin-1-yl acetate**

Followed **Method F** (reaction time = 5 h, Q = 5.60 F/mol), the desired product was purified using silica gel chromatography (petroleum ether/ethyl acetate = 10:1 - 5:1) to give 63.6 mg (68% yield) of **22** as a white solid.

**IR (neat, cm<sup>-1</sup>):** 3071 (w), 1749 (s), 1702 (m), 1596 (m), 1444 (m), 1367 (m), 1252 (s), 1192 (s), 1167 (s), 1117 (m), 815 (m), 764 (m); **<sup>1</sup>H NMR (500 MHz, Chloroform-*d*)**  $\delta$  7.90 – 7.85 (m, 2H), 7.78 (d,  $J = 6.9$  Hz, 2H), 7.58 – 7.54 (m, 1H), 7.51 (dd,  $J = 7.0, 2.4$  Hz, 1H), 7.44 – 7.36 (m, 3H), 7.29 – 7.26 (m, 2H), 7.25 – 7.22 (m, 1H), 2.40 (s, 3H), 2.09 (s, 3H); **<sup>13</sup>C NMR (126 MHz, Chloroform-*d*)**  $\delta$  190.0, 167.9, 164.3 (d,  $J = 253.9$  Hz), 164.2 (d,  $J = 3.5$  Hz), 146.0, 136.6 (d,  $J = 2.7$  Hz), 135.0, 134.6, 133.5, 132.7 (d,  $J = 8.8$  Hz), 129.7, 129.5, 129.2, 128.8, 125.0 (d,  $J = 8.6$  Hz), 122.2 (d,  $J = 23.7$  Hz), 112.5 (d,  $J = 24.4$  Hz), 94.4, 21.9, 21.8; **<sup>19</sup>F NMR (471 MHz, Chloroform-*d*)**  $\delta$  -106.6 (m).

**HRMS (ESI)** calculated for C<sub>24</sub>H<sub>18</sub>FNNaO<sub>6</sub>S<sup>+</sup> [M+Na<sup>+</sup>]: 490.0731; found: 490.0731.

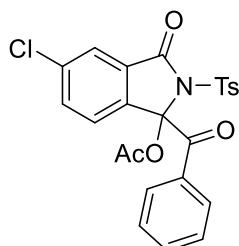

**23: 1-benzoyl-5-chloro-3-oxo-2-tosylisoindolin-1-yl acetate**

Followed **Method F** (current = 8 mA, reaction time = 2 h,  $Q = 2.98$  F/mol), the desired product was purified using silica gel chromatography (petroleum ether/ethyl acetate = 10:1 - 5:1) to give 39.7 mg (41% yield) of **23** as a white solid.

**IR (neat,  $\text{cm}^{-1}$ ):** 3067 (w), 1751 (s), 1700 (w), 1596 (w), 1446 (w), 1367 (m), 1244 (s), 1169 (s), 1139 (m), 815 (m), 772 (w), 735 (s);  **$^1\text{H}$  NMR (500 MHz, Chloroform-*d*)**  $\delta$  7.90 – 7.87 (m, 2H), 7.83 (d,  $J = 1.6$  Hz, 1H), 7.80 (s, 1H), 7.79 – 7.78 (m, 1H), 7.63 – 7.55 (m, 1H), 7.53 (dd,  $J = 8.2, 2.0$  Hz, 1H), 7.47 – 7.40 (m, 2H), 7.35 (d,  $J = 8.0$  Hz, 1H), 7.29 (d,  $J = 8.0$  Hz, 2H), 2.42 (s, 3H), 2.11 (s, 3H);  **$^{13}\text{C}$  NMR (126 MHz, Chloroform-*d*)**  $\delta$  189.9, 167.9, 164.1, 146.0, 139.2, 137.9, 135.0, 134.8, 134.6, 133.5, 132.0, 129.7, 129.5, 129.2, 128.8, 125.6, 124.2, 94.4, 21.9, 21.9.

**HRMS (ESI)** calculated for  $\text{C}_{24}\text{H}_{18}\text{ClNNaO}_6\text{S}^+$  [ $\text{M}+\text{Na}^+$ ]: 506.0435; found:506.0435.

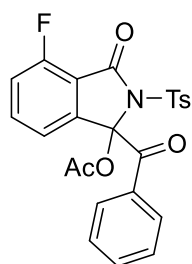**24: 1-benzoyl-4-fluoro-3-oxo-2-tosylisoindolin-1-yl acetate**

Followed **Method F** (reaction time = 5 h,  $Q = 5.60$  F/mol), the desired product was purified using silica gel chromatography (petroleum ether/ethyl acetate = 10:1 - 5:1) to give 77.6 mg (83% yield) of **24** as a white solid.

**IR (neat,  $\text{cm}^{-1}$ ):** 3066 (w), 1750 (s), 1698 (w), 1596 (m), 1482 (m), 1367 (s), 1236 (s), 1203 (s), 1175 (s), 1133 (m), 813 (m), 765 (m);  **$^1\text{H}$  NMR (500 MHz, Chloroform-*d*)**  $\delta$  7.88 (d,  $J = 8.4$  Hz, 2H), 7.85 (d,  $J = 6.9$  Hz, 2H), 7.65 – 7.57 (m, 1H), 7.57 – 7.53 (m, 1H), 7.45 (t,  $J = 7.9$  Hz, 2H), 7.28 (d,  $J = 7.7$  Hz, 2H), 7.22 – 7.14 (m, 2H), 2.41 (s, 3H), 2.12 (s, 3H);  **$^{13}\text{C}$  NMR (126 MHz, Chloroform-*d*)**  $\delta$  190.3, 167.8, 162.0, 159.3 (d,  $J = 266.6$  Hz), 146.0, 143.2, 137.0 (d,  $J = 8.0$  Hz), 134.8, 134.7, 133.5, 129.8, 129.5, 129.3, 128.8, 119.1 (d,  $J = 19.1$  Hz), 118.6 (d,  $J = 4.0$  Hz), 117.4 (d,  $J = 13.3$  Hz), 94.0, 21.9, 21.9;  **$^{19}\text{F}$  NMR (471 MHz, Chloroform-*d*)**  $\delta$  -112.7 (m).

**HRMS (ESI)** calculated for  $\text{C}_{24}\text{H}_{18}\text{FNNaO}_6\text{S}^+$  [ $\text{M}+\text{Na}^+$ ]: 490.0731; found:490.0733.

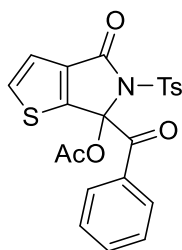

**25: 6-benzoyl-4-oxo-5-tosyl-5,6-dihydro-4H-thieno[2,3-c]pyrrol-6-yl acetate**

Followed **Method F** (current = 3 mA, Q = 1.68 F/mol), the desired product was purified using silica gel chromatography (petroleum ether/ethyl acetate = 10:1 - 5:1) to give 28.2 mg (31% yield) of **25** as a white solid.

**IR (neat, cm<sup>-1</sup>):** 3103 (w), 3068 (w), 1744 (s), 1704 (m), 1596 (w), 1431 (w), 1366 (m), 1283 (m), 1172 (s), 1134 (s), 814 (w), 756 (m); **<sup>1</sup>H NMR (500 MHz, Chloroform-*d*)** δ 7.95 (d, *J* = 8.1 Hz, 2H), 7.73 (d, *J* = 4.9 Hz, 1H), 7.67 (d, *J* = 6.7 Hz, 2H), 7.53 (t, *J* = 7.4 Hz, 1H), 7.36 (t, *J* = 7.8 Hz, 2H), 7.29 (d, *J* = 8.1 Hz, 2H), 7.20 (d, *J* = 4.9 Hz, 1H), 2.42 (s, 3H), 2.18 (s, 3H); **<sup>13</sup>C NMR (126 MHz, Chloroform-*d*)** δ 186.8, 168.0, 159.9, 152.0, 145.7, 138.7, 135.7, 134.5, 133.8, 133.6, 129.4, 129.2, 129.1, 128.9, 125.1, 93.5, 21.8, 21.5.

**HRMS (ESI)** calculated for C<sub>22</sub>H<sub>17</sub>NNaO<sub>6</sub>S<sub>2</sub><sup>+</sup> [M+Na<sup>+</sup>]: 478.0389; found: 478.0389.

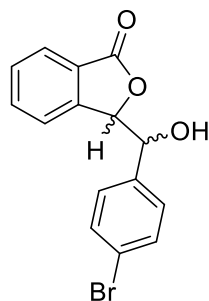

**27: 3-((4-bromophenyl)(hydroxy)methyl)isobenzofuran-1(3H)-one**

Followed **Method H**, the desired product was purified using silica gel chromatography (petroleum ether/ethyl acetate = 5:1) to give 19.1 mg (60% yield, dr = 1:1) of **27** as a white solid.

**IR (neat, cm<sup>-1</sup>):** 3404 (m), 3082 (w), 1749 (s), 1288 (m), 1070 (s), 726 (s), 692 (m). **<sup>1</sup>H NMR (500 MHz, Chloroform-*d*)** δ 7.87 – 7.80 (m, 1H, diastereoisomer), 7.60 – 7.41 (m, 4H, diastereoisomer), 7.27 (d, *J* = 8.0 Hz, 2H, diastereoisomer 1), 7.21 (d, *J* = 8.4 Hz, 2H, diastereoisomer 2), 6.96 (d, *J* = 7.5 Hz, 1H, diastereoisomer 1), 6.88 (d, *J* = 7.5 Hz, 1H, diastereoisomer 2), 5.62 (d, *J* = 4.5 Hz, 1H, diastereoisomer 1), 5.59 (d, *J* = 6.5 Hz, 1H, diastereoisomer 2), 5.20 (t, *J* = 3.8 Hz, 1H, diastereoisomer 1), 4.85 (d,



$J = 6.5$  Hz, 1H, diastereoisomer 2), 3.01 (s, 1H, diastereoisomer 1), 2.87 (d,  $J = 4.1$  Hz, 1H, diastereoisomer 2);  $^{13}\text{C}$  NMR (126 MHz, Chloroform-*d*)  $\delta$  170.5, 170.0, 145.9, 145.7, 137.3, 136.6, 134.0, 133.8, 131.8, 129.8, 129.7, 129.4, 128.3, 127.0, 125.9, 125.8, 123.6, 123.5, 123.1, 122.5, 83.7, 83.5, 75.6, 73.4.

HRMS (ESI) calculated for  $\text{C}_{15}\text{H}_{11}\text{BrNaO}_3^+$  [ $\text{M}+\text{Na}^+$ ]: 340.9784; found:340.9791.

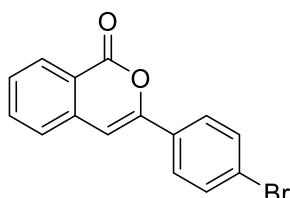

**28: 3-((4-bromophenyl)(hydroxy)methyl)isobenzofuran-1(3H)-one**

Followed **Method I** ( $Q = 7.46$  F/mol), the desired product was purified using silica gel chromatography (petroleum ether/ethyl acetate = 5:1) to give 17.5 mg (29% yield) of **28** as a white solid.

**IR** (neat,  $\text{cm}^{-1}$ ): 3099 (w), 1725 (s), 1640 (w), 1239 (w), 1071 (m), 823 (m), 750 (w).

$^1\text{H}$  NMR (500 MHz, Chloroform-*d*)  $\delta$  8.30 – 8.17 (m, 1H), 7.72 – 7.66 (m, 3H), 7.57 – 7.53 (m, 2H), 7.50 – 7.44 (m, 2H), 6.90 (s, 1H);  $^{13}\text{C}$  NMR (126 MHz, Chloroform-*d*)  $\delta$  161.9, 152.4, 137.1, 135.0, 132.0, 130.7, 129.6, 128.4, 126.6, 126.1, 124.3, 120.4, 102.1.

HRMS (ESI) calculated for  $\text{C}_{15}\text{H}_9\text{BrNaO}_2^+$  [ $\text{M}+\text{Na}^+$ ]: 322.9678; found:322.9674.

## 4. Radical Trapping Experiments

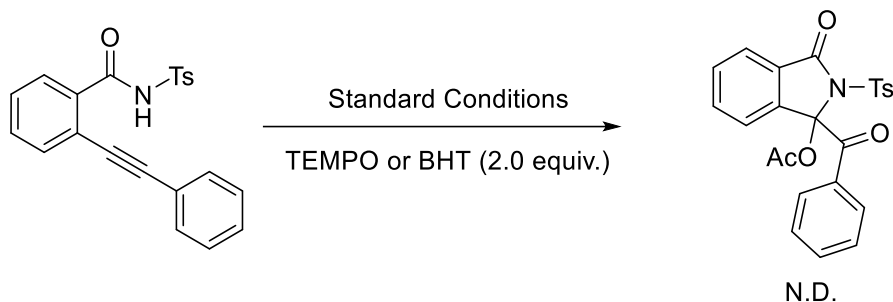

In an oven-dried undivided three-necked glassware (25 mL) equipped with a stirring bar, 2-(phenylethynyl)-N-tosylbenzamides (0.2 mmol, 1.0 equiv.),  $n\text{Bu}_4\text{NOAc}$  (0.2 mmol, 1.0 equiv.) and either TEMPO or BHT (0.4 mmol, 2.0 equiv.) were added. The glassware was equipped with carbon cloth (15 mm  $\times$  15 mm  $\times$  0.1 mm) as the anode and platinum plate (15 mm  $\times$  15 mm  $\times$  0.1 mm) as the cathode (Note: the electrodes need to be thoroughly dried before use). Under the protection of  $\text{N}_2$ , MeCN and  $\text{CH}_3\text{CO}_2\text{H} = 8:2$  (10 mL) were injected into the glassware *via* syringes. The reaction mixture was stirred and electrolyzed at a constant current of 6 mA at an ambient temperature for 3.0 h. The reaction mixture was concentrated *in vacuo*. After flash column chromatography, no product was detected, and 80% and 76% of the starting material were recovered, respectively.

## 5. Cyclic Voltammetry Studies

**General information:** Cyclic voltammetry (CV) experiments were conducted in a 10 mL glass vial fitted with a glassy carbon working electrode (3 mm in diameter), a platinum wire auxiliary electrode, and an SCE reference electrode. The current was reported in A, while all potentials were reported in V. The scan rate was 0.1 V/s.

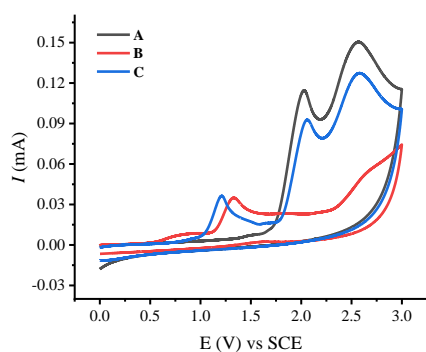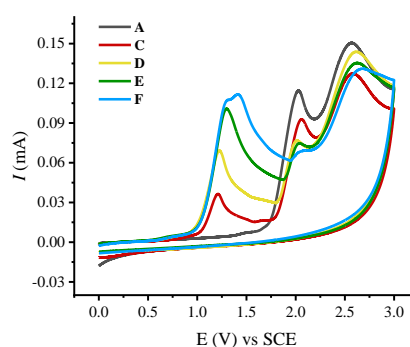

Cyclic voltammograms with  $n\text{Bu}_4\text{NPF}_6$  (10 mM) as the electrolyte. **left:** (A) **1** (2 mM); (B)  $n\text{Bu}_4\text{NOAc}$  (2 mM); (C) **1** (2 mM) +  $n\text{Bu}_4\text{NOAc}$  (2 mM); **right:** (D) **1** (2 mM) +  $n\text{Bu}_4\text{NOAc}$  (4 mM); (E) **1** (2 mM) +  $n\text{Bu}_4\text{NOAc}$  (6 mM); (F) **1** (2 mM) +  $n\text{Bu}_4\text{NOAc}$  (8 mM).

## 6. Unsuccessful Substrates

Unfortunately, the current protocol is not transferable to alkynylbenzamides bearing N-methyl, N-aryl, 2-(phenylethynyl)benzamide or an aliphatic alkyne moiety

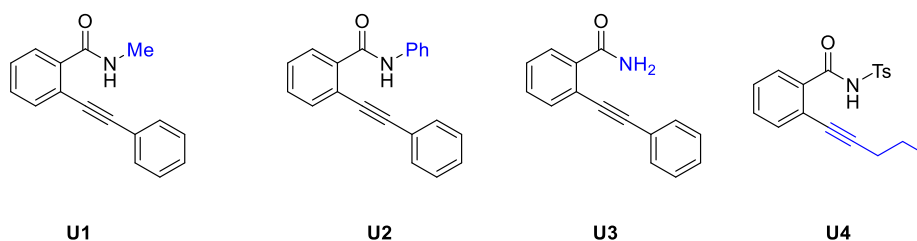

## 7. Attempt of Using Water as the Nucleophile

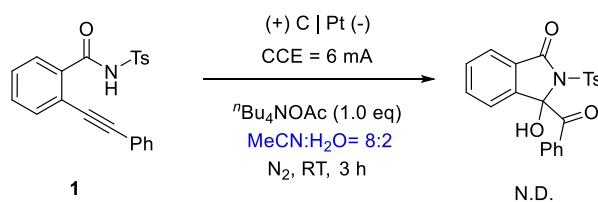

In an oven-dried undivided three-necked glassware (25 mL) equipped with a stirring bar, 2-(phenylethynyl)-N-tosylbenzamides (0.2 mmol, 1.0 equiv.) and  $n\text{Bu}_4\text{NOAc}$  (0.2 mmol, 1.0 equiv.) were added. The glassware was equipped with carbon cloth (15 mm  $\times$  15 mm  $\times$  0.1 mm) as the anode and platinum plate (15 mm  $\times$  15 mm  $\times$  0.1 mm) as the cathode. Under the protection of  $\text{N}_2$ , MeCN and  $\text{H}_2\text{O} = 8:2$  (10 mL) were injected into the glassware *via* syringes. The reaction mixture was stirred and electrolyzed at a constant current of 6 mA at an ambient temperature for 3.0 h. The reaction was diluted with EtOAc and then the organic layer was washed with  $\text{H}_2\text{O}$  and brine, dried over  $\text{Na}_2\text{SO}_4$ . Following concentration in vacuo, the NMR spectroscopy ( $\text{DMSO}-d_6$ ) of the crude residue showed no desired product but only the recovery of starting material.

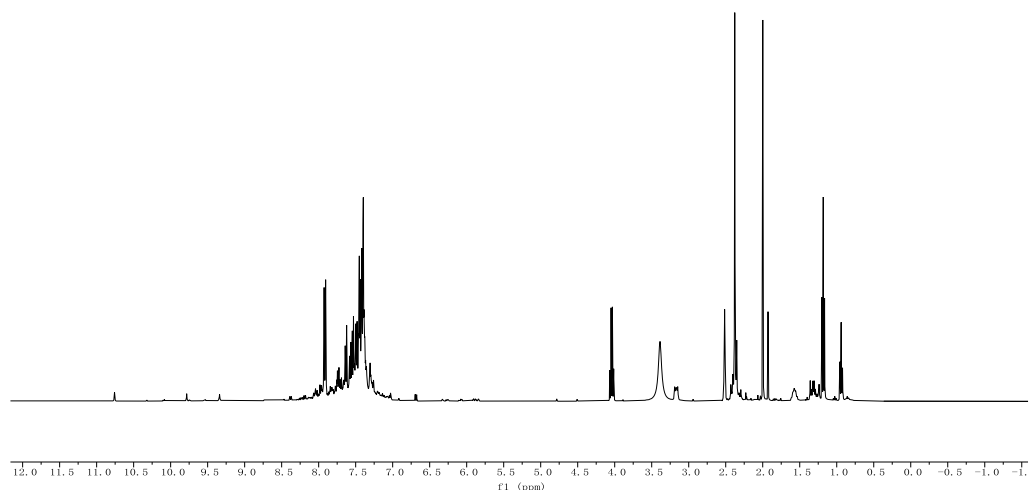

$^1\text{H}$  NMR of the crude reaction mixture ( $\text{DMSO-}d_6$ )

## 8. Proposed Mechanism for the Transformation from **6** to **28**

Electrochemical reduction of the obtained isoindolinone (**6**) should be mechanistically distinct from the chemical reduction of  $\text{NaBH}_4$ . We reason a hydrolysis might take place before the selective electrochemical reduction of one of the three carbonyls of **6A** to form the corresponding hydroxyl counterpart (**6B**), which further undergoes cyclization to generate the precursor (**6C**) for the final electrochemical reduction to give the observed isochromenone (**28**). While the electrochemical reduction of carbonyl groups is known,<sup>7-8</sup> the detailed mechanism of this transformation, however, needs further extensive investigations.

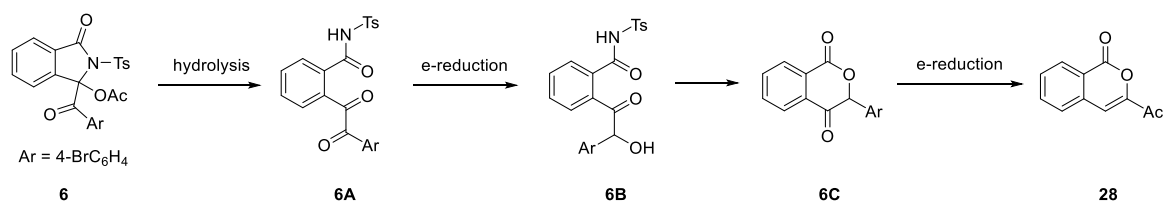

## 9. References

1. Lv, J., Zhao, B., Liu, L., Han, Y., Yuan, Y., and Shi, Z. *Adv. Synth. Catal.*, 2018, **360**, 4054-4059.
2. Vong, K., Yamamoto, T., Chang, T.C., and Tanaka, K. *Chem. Sci.*, 2020, **11**, 10928-10933.
3. (a) Miles, K.C., Le, C.C., and Stambuli, J.P. *Chem. Eur. J.*, 2014 **20**, 11336-11339; (b) Norseeda, K., Chaisan, N., Thongsornkleeb, C., Tummatorn, J., and Ruchirawat, S. *J. Org. Chem.*, 2019, **84**, 16222-16236.
4. (a) Boelke, A., Kuczmera, T.J., Caspers, L.D., Lork, E., and Nachtsheim, B.J. *Org. Lett.*, 2020, **22** 7261-7266; (b) Liu, R., Yang, M., Xie, W., Dong, W., Zhou, H., Yadav, S., Potkin, V.I., and Qiu, G. *J. Org., Chem.*, 2020, **85**, 5312-5320.
5. Sultane, P.R., Ahumada, G., Janssen-Muller, D., and Bielawski, C.W. *Angew. Chem. Int. Ed.*, 2019 **58**, 16320-16325.
6. Bai, Y., Shi, L., Zheng, L., Ning, S., Che, X., Zhang, Z., and Xiang, J. *Org. Lett.*, 2021, **23** 2298-2302.
7. Y. Kawamata, K. Hayashi, E. Carlson, S. Shaji, D. Waldmann, B. J. Simmons, J. T. Edwards, C. W. Zapf, M. Saito and P. S. Baran, *J. Am. Chem. Soc.*, 2021, **143**, 16580-16588;
8. Y. Bai, L. Shi, L. Zheng, S. Ning, X. Che, Z. Zhang and J. Xiang, *Org. Lett.*, 2021, **23**, 2298-2302.

# 10. Spectral Data ( $^1\text{H}$ , $^{13}\text{C}$ , $^{19}\text{F}$ )

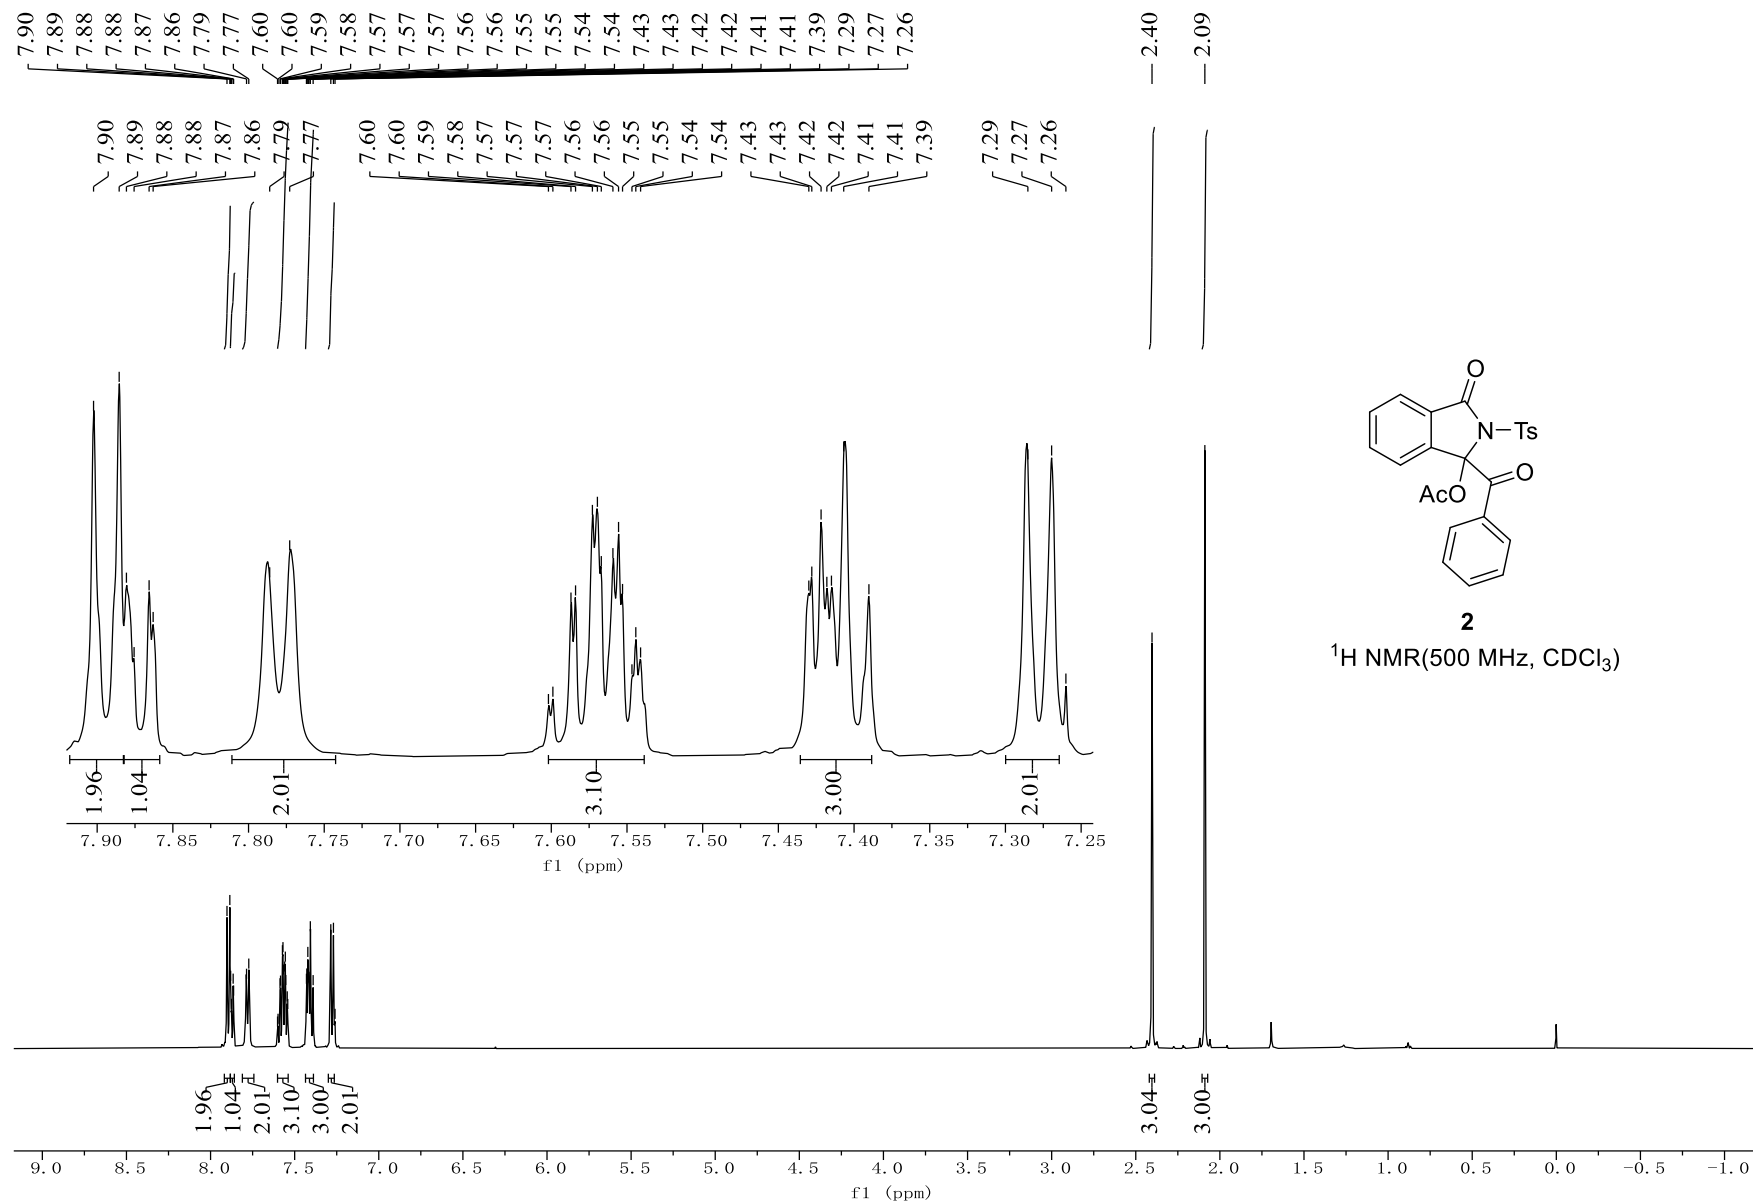

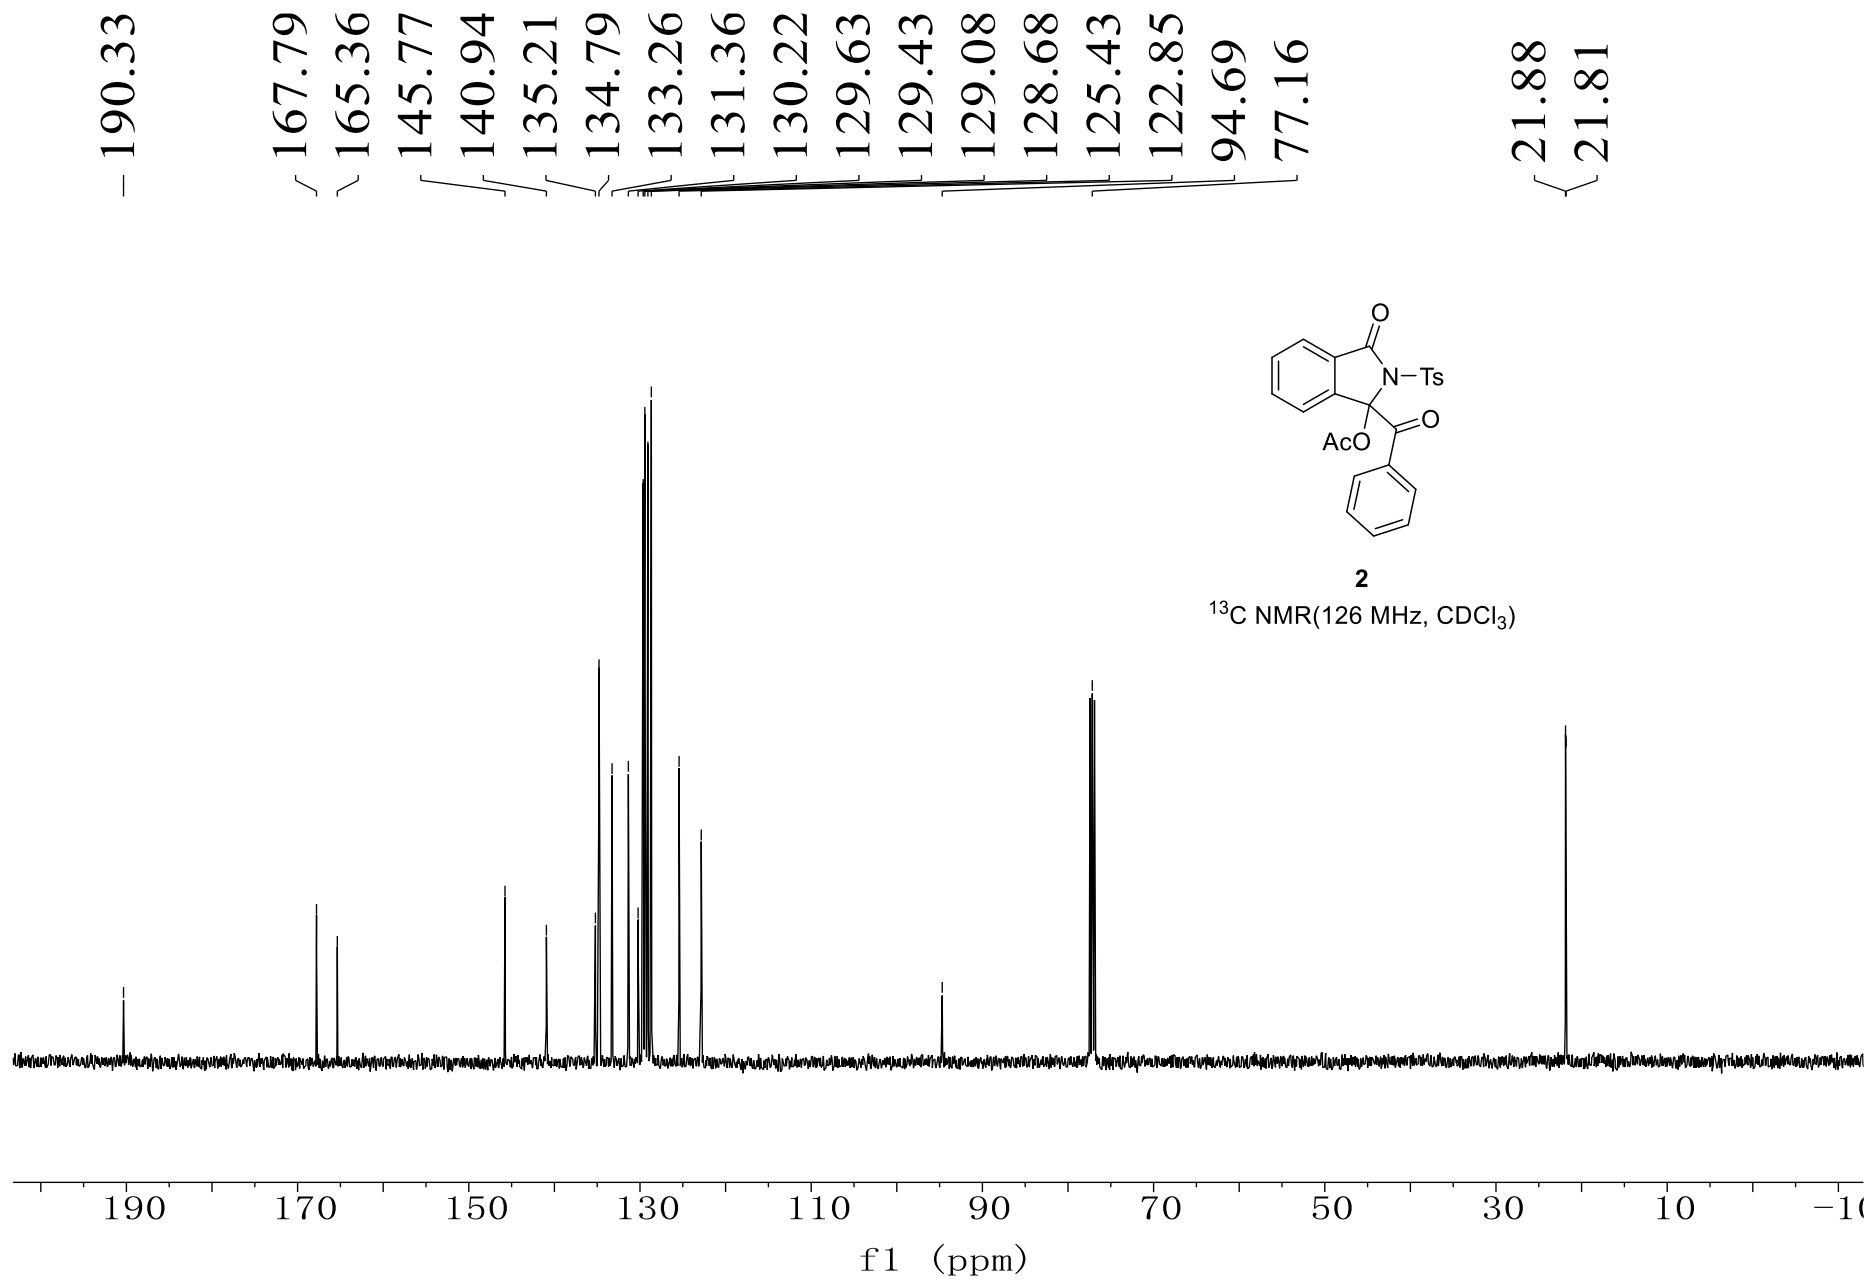

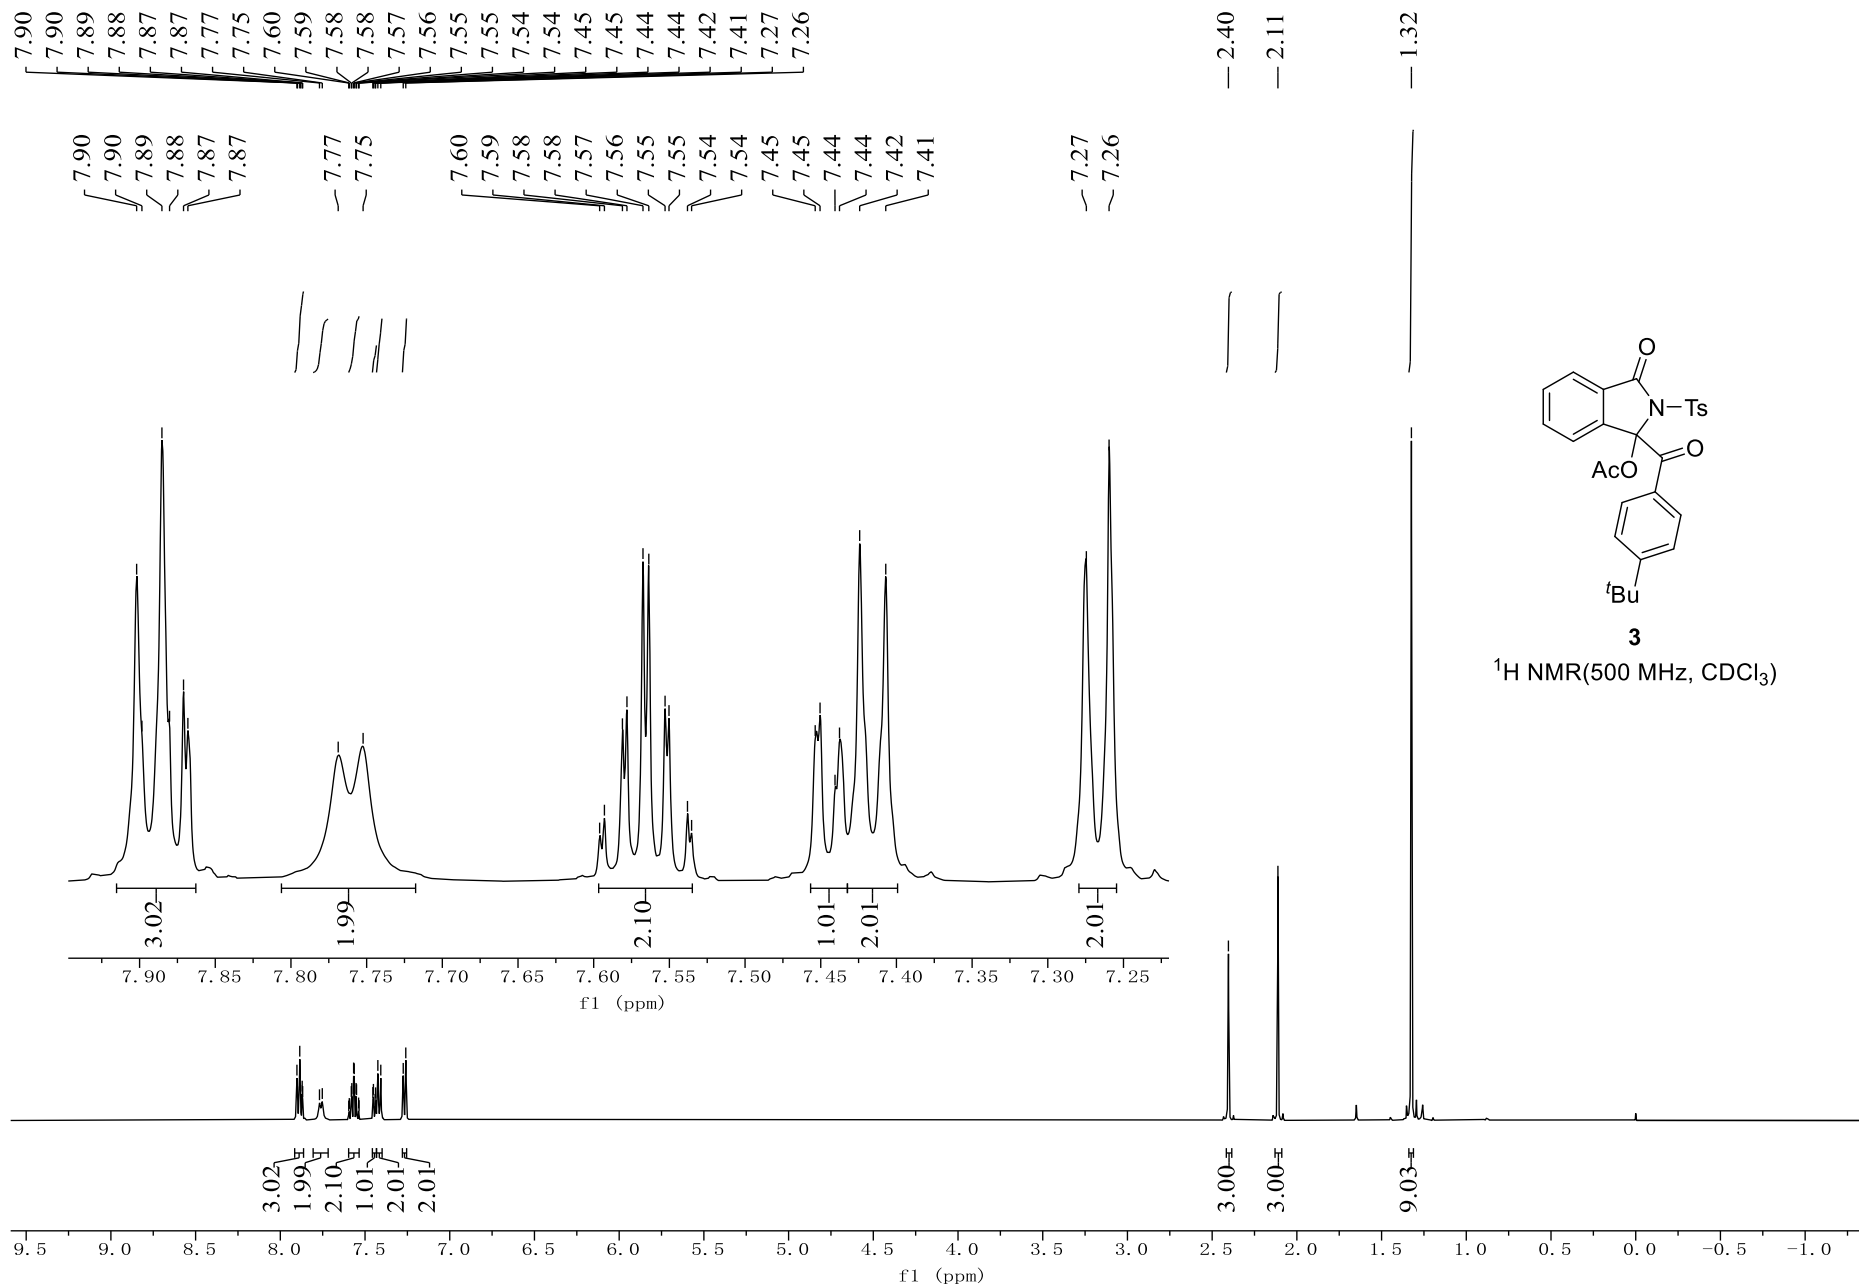



189.34  
167.90  
165.48  
157.27  
145.66  
141.16  
135.30  
134.73  
131.76  
131.28  
130.26  
129.81  
129.39  
129.18  
125.75  
125.41  
123.03  
94.84  
77.16

35.26  
31.12  
21.96  
21.84

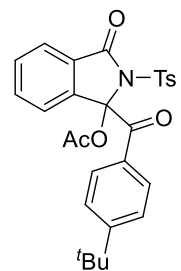

3

<sup>13</sup>C NMR(126 MHz, CDCl<sub>3</sub>)

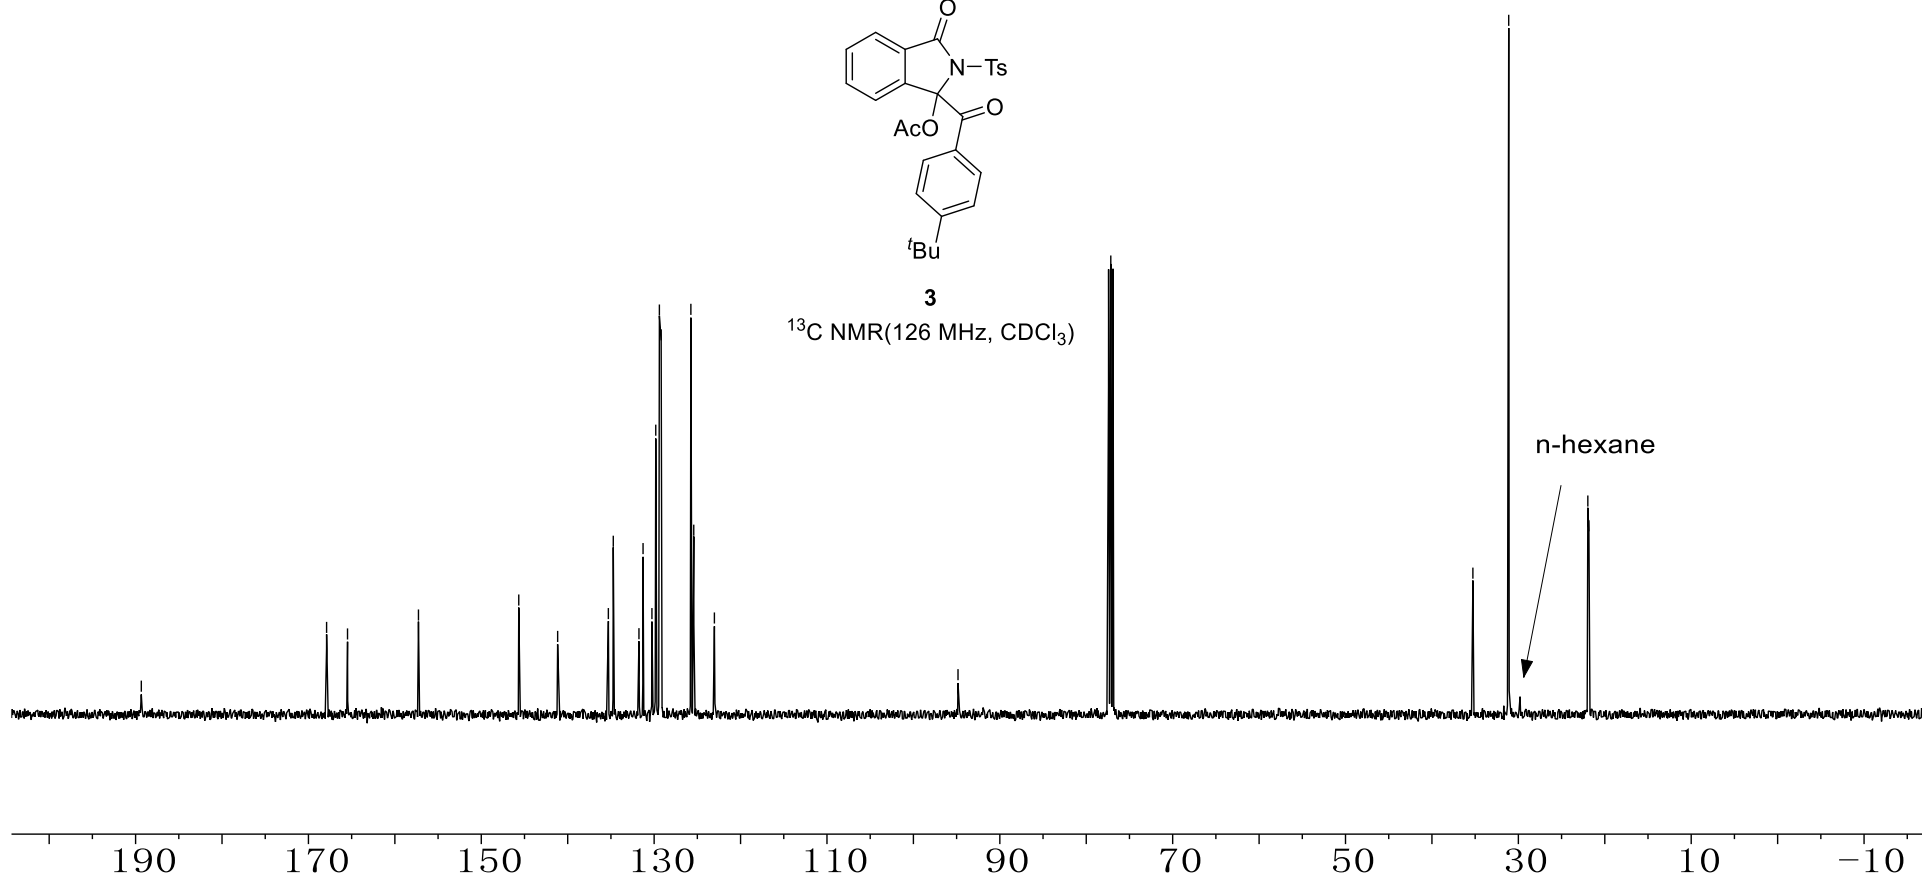

f1 (ppm)  
533

7.95  
7.93  
7.89  
7.89  
7.88  
7.88  
7.87  
7.86  
7.85  
7.84  
7.61  
7.61  
7.60  
7.60  
7.59  
7.58  
7.57  
7.57  
7.55  
7.55  
7.41  
7.40  
7.39  
7.39  
7.31  
7.30  
7.26  
7.11  
7.09  
7.08

7.95  
7.93  
7.89  
7.89  
7.88  
7.88  
7.87  
7.86  
7.85  
7.84  
7.61  
7.61  
7.60  
7.59  
7.58  
7.58  
7.57  
7.57  
7.55  
7.55  
7.41  
7.40  
7.39  
7.39  
7.31  
7.30  
7.26

7.11  
7.09  
7.08

2.42  
2.09

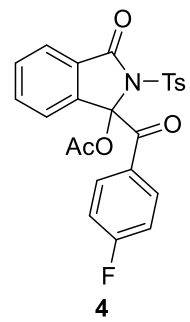

<sup>1</sup>H NMR(500 MHz, CDCl<sub>3</sub>)

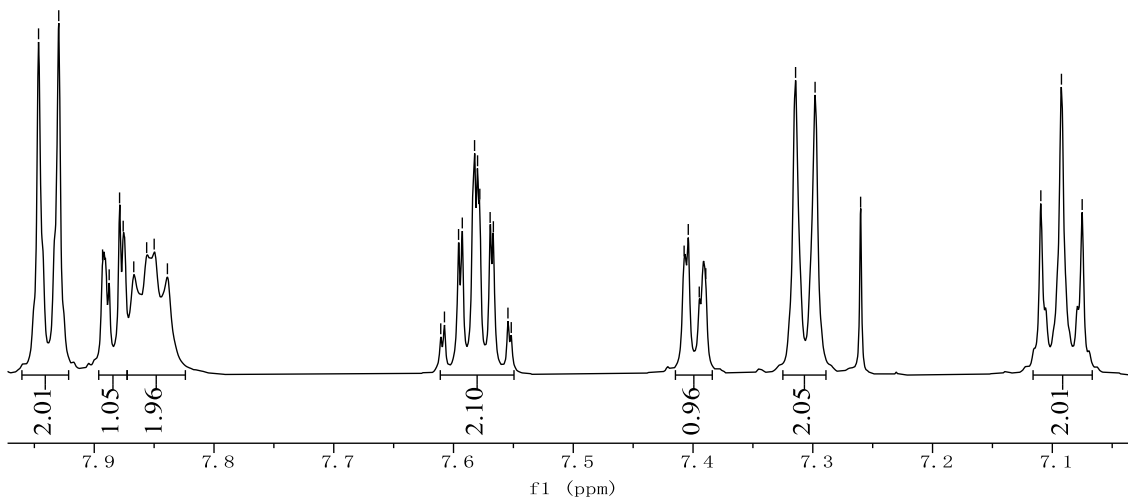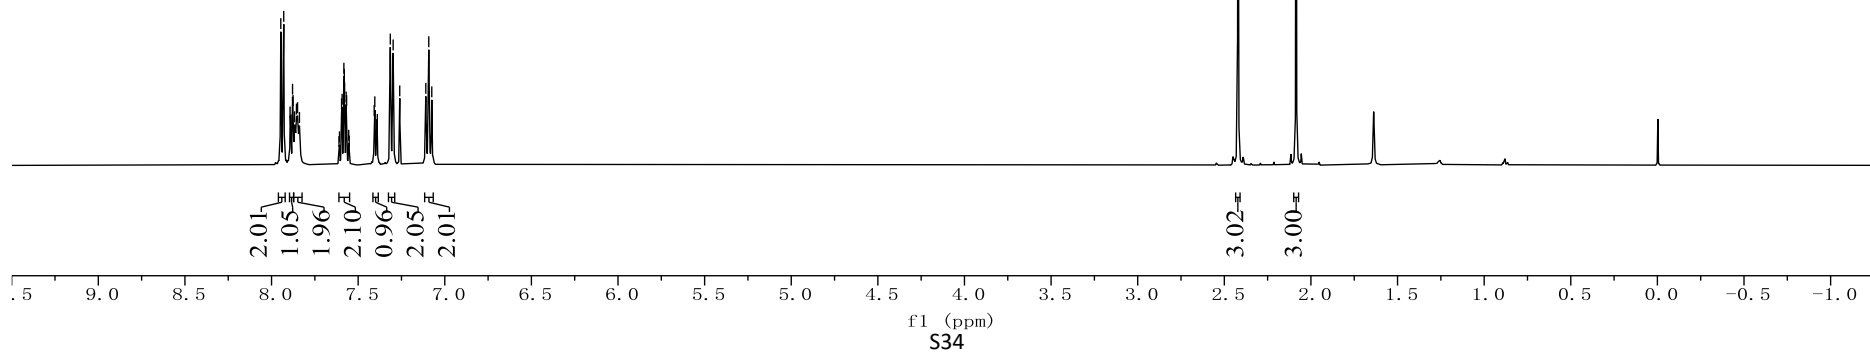

S34

188.81  
167.70  
166.76  
165.29  
164.72  
145.92  
140.90  
135.19  
134.86  
132.56  
132.49  
131.48  
130.98  
130.95  
130.18  
129.52  
129.06  
125.57  
122.84  
116.07  
115.90  
94.66  
77.16  
21.90  
21.86

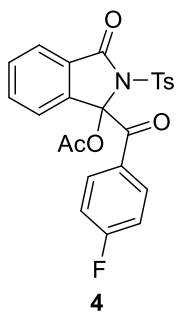

<sup>13</sup>C NMR (126 MHz, CDCl<sub>3</sub>)

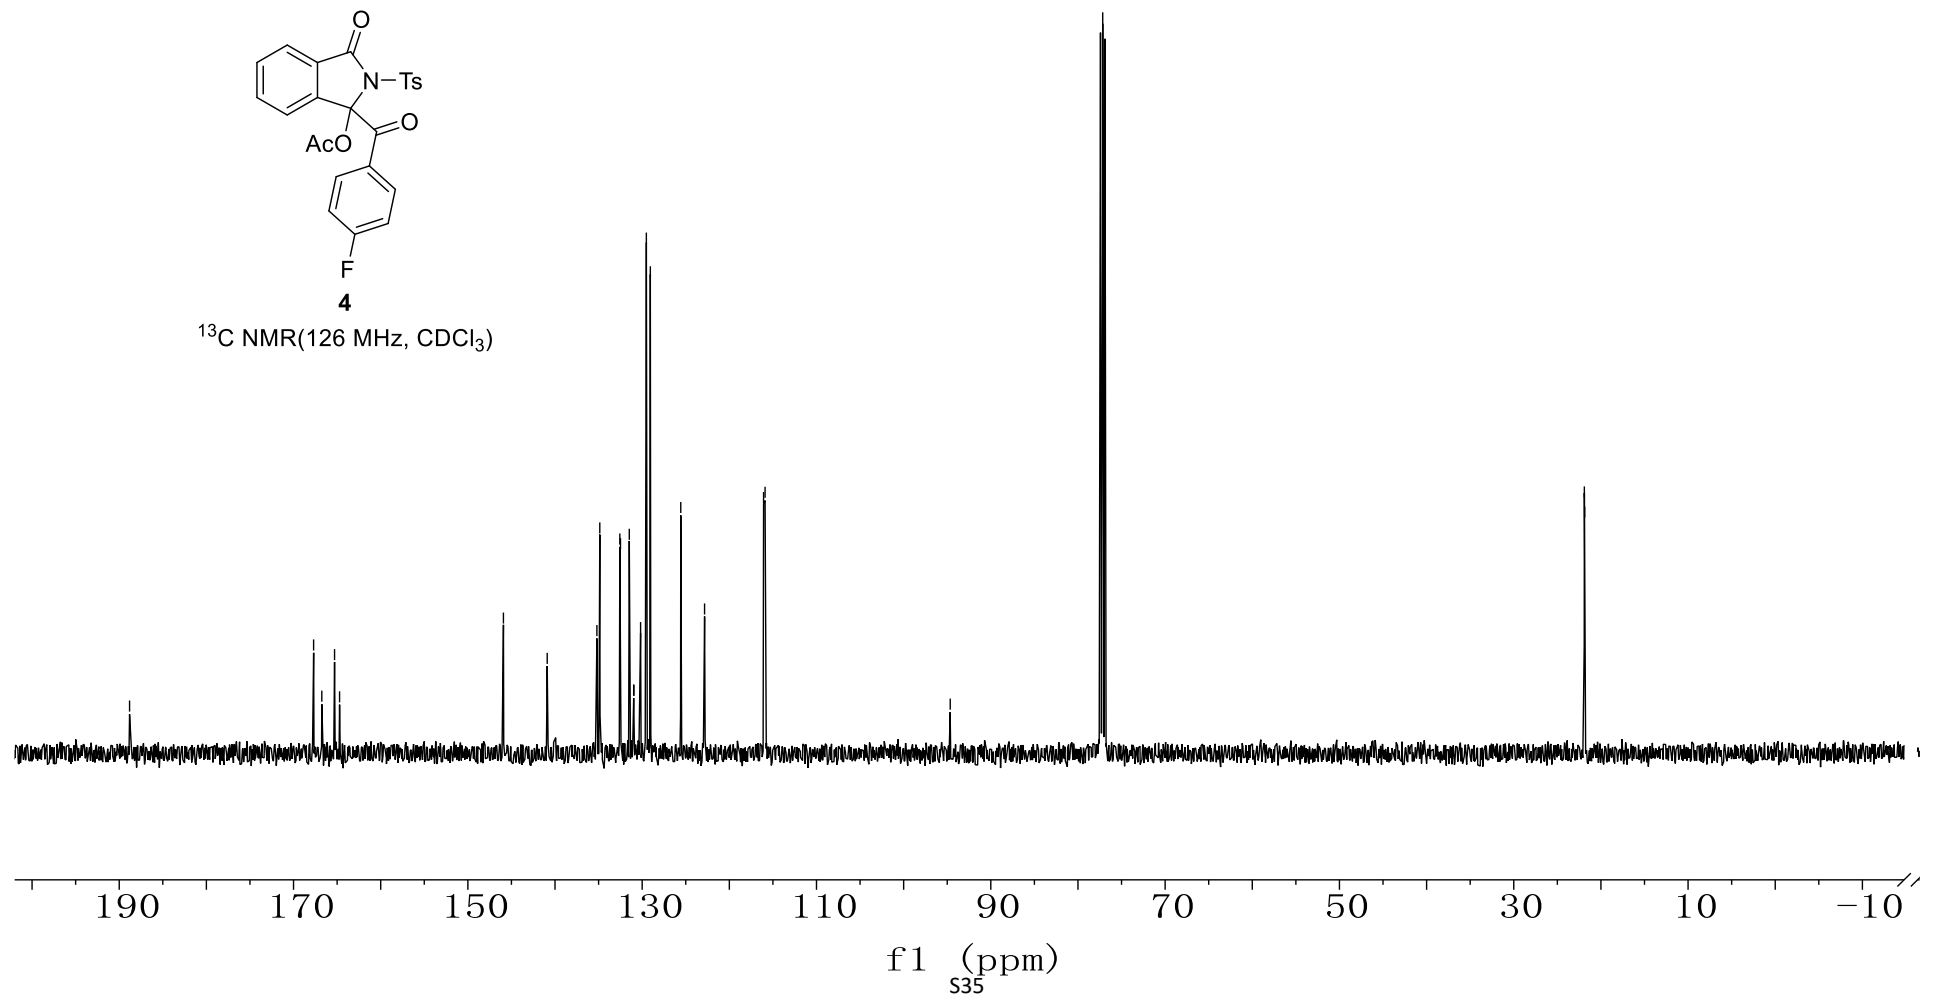

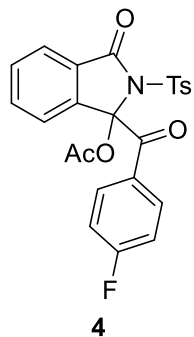

<sup>19</sup>F NMR(471 MHz, CDCl<sub>3</sub>)

-103.84

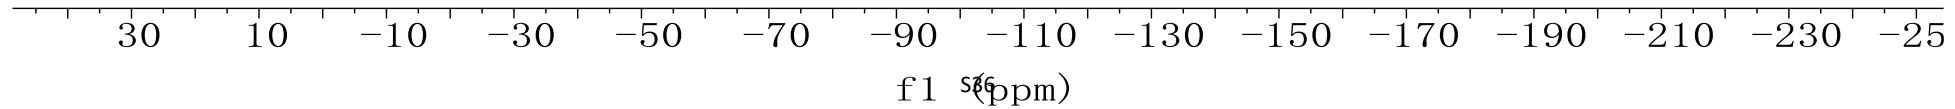

7.93  
7.91  
7.89  
7.89  
7.88  
7.88  
7.74  
7.72  
7.62  
7.61  
7.60  
7.60  
7.59  
7.58  
7.57  
7.57  
7.56  
7.56  
7.40  
7.40  
7.39  
7.39  
7.37  
7.31  
7.29  
7.26

7.93  
7.91  
7.89  
7.89  
7.88  
7.88

7.74  
7.72

7.62  
7.61  
7.60  
7.60  
7.59  
7.58  
7.57  
7.57  
7.56  
7.56

7.40  
7.40  
7.39  
7.39  
7.37

7.31  
7.29

2.42  
2.08

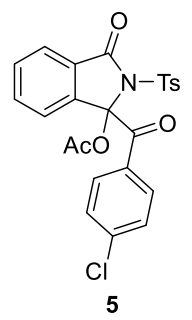

<sup>1</sup>H NMR(500 MHz, CDCl<sub>3</sub>)

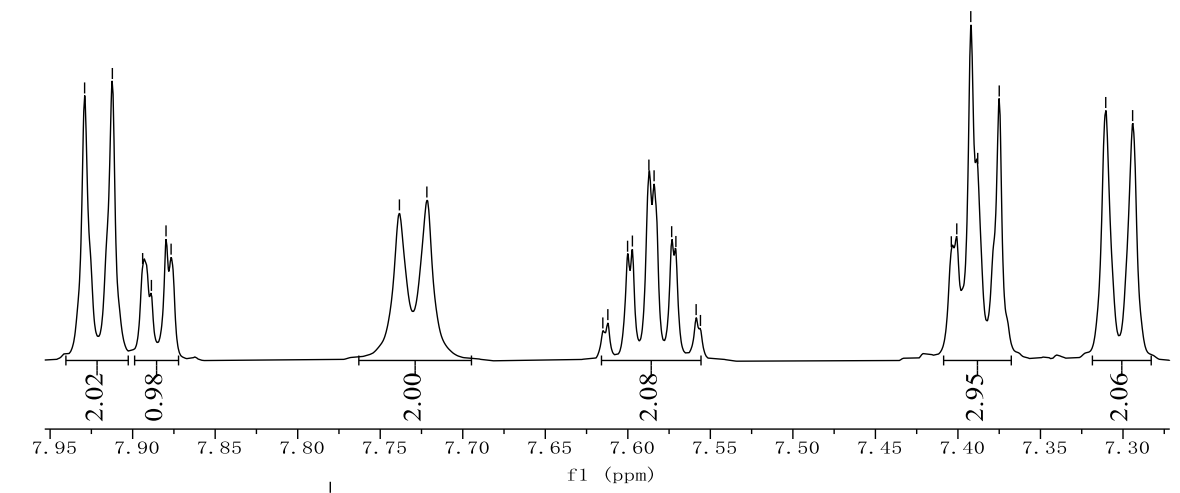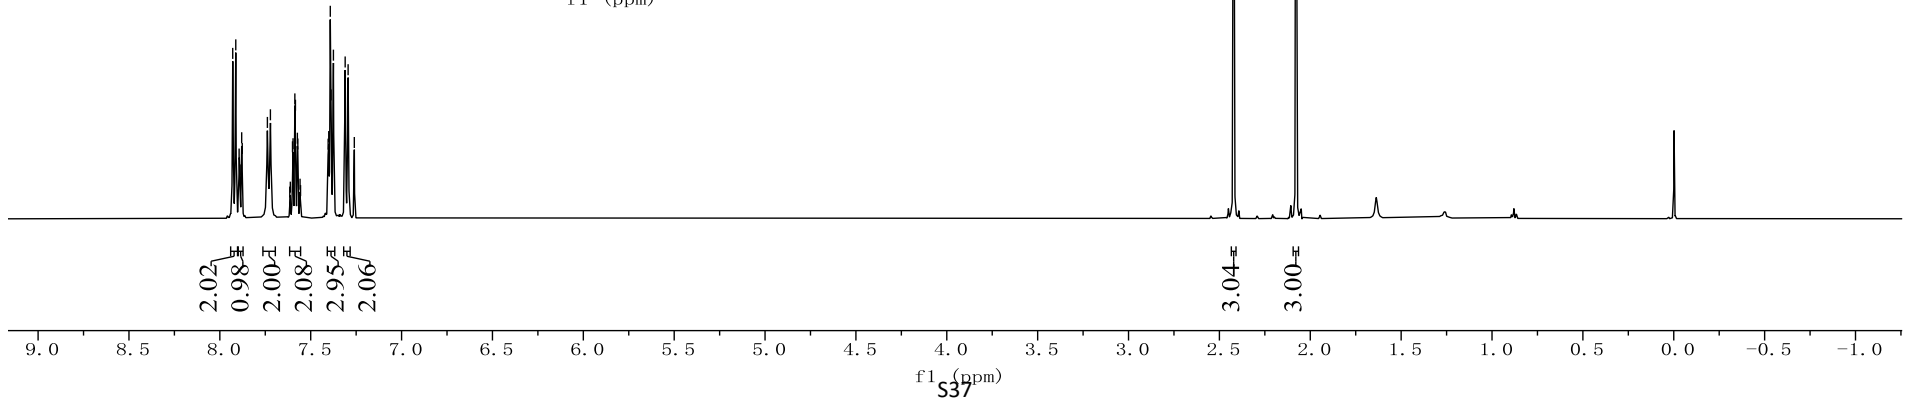

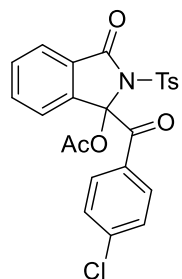

5

$^{13}\text{C}$  NMR (126 MHz,  $\text{CDCl}_3$ )

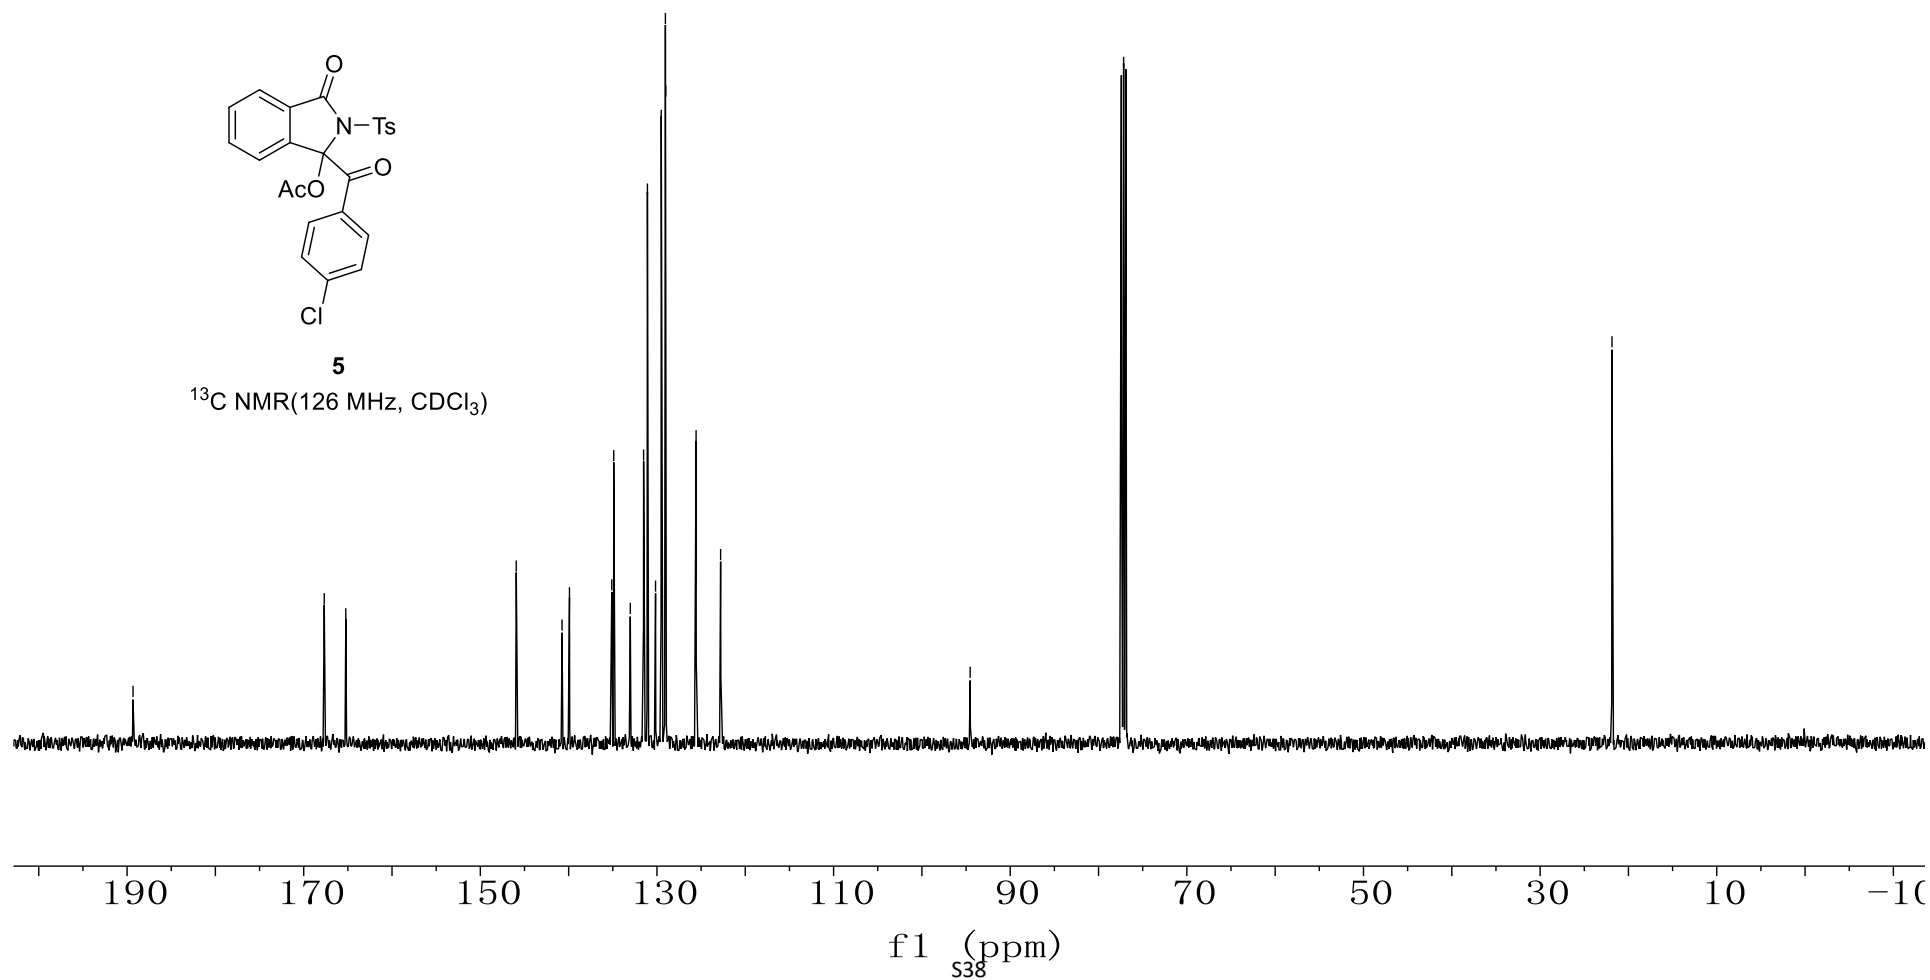

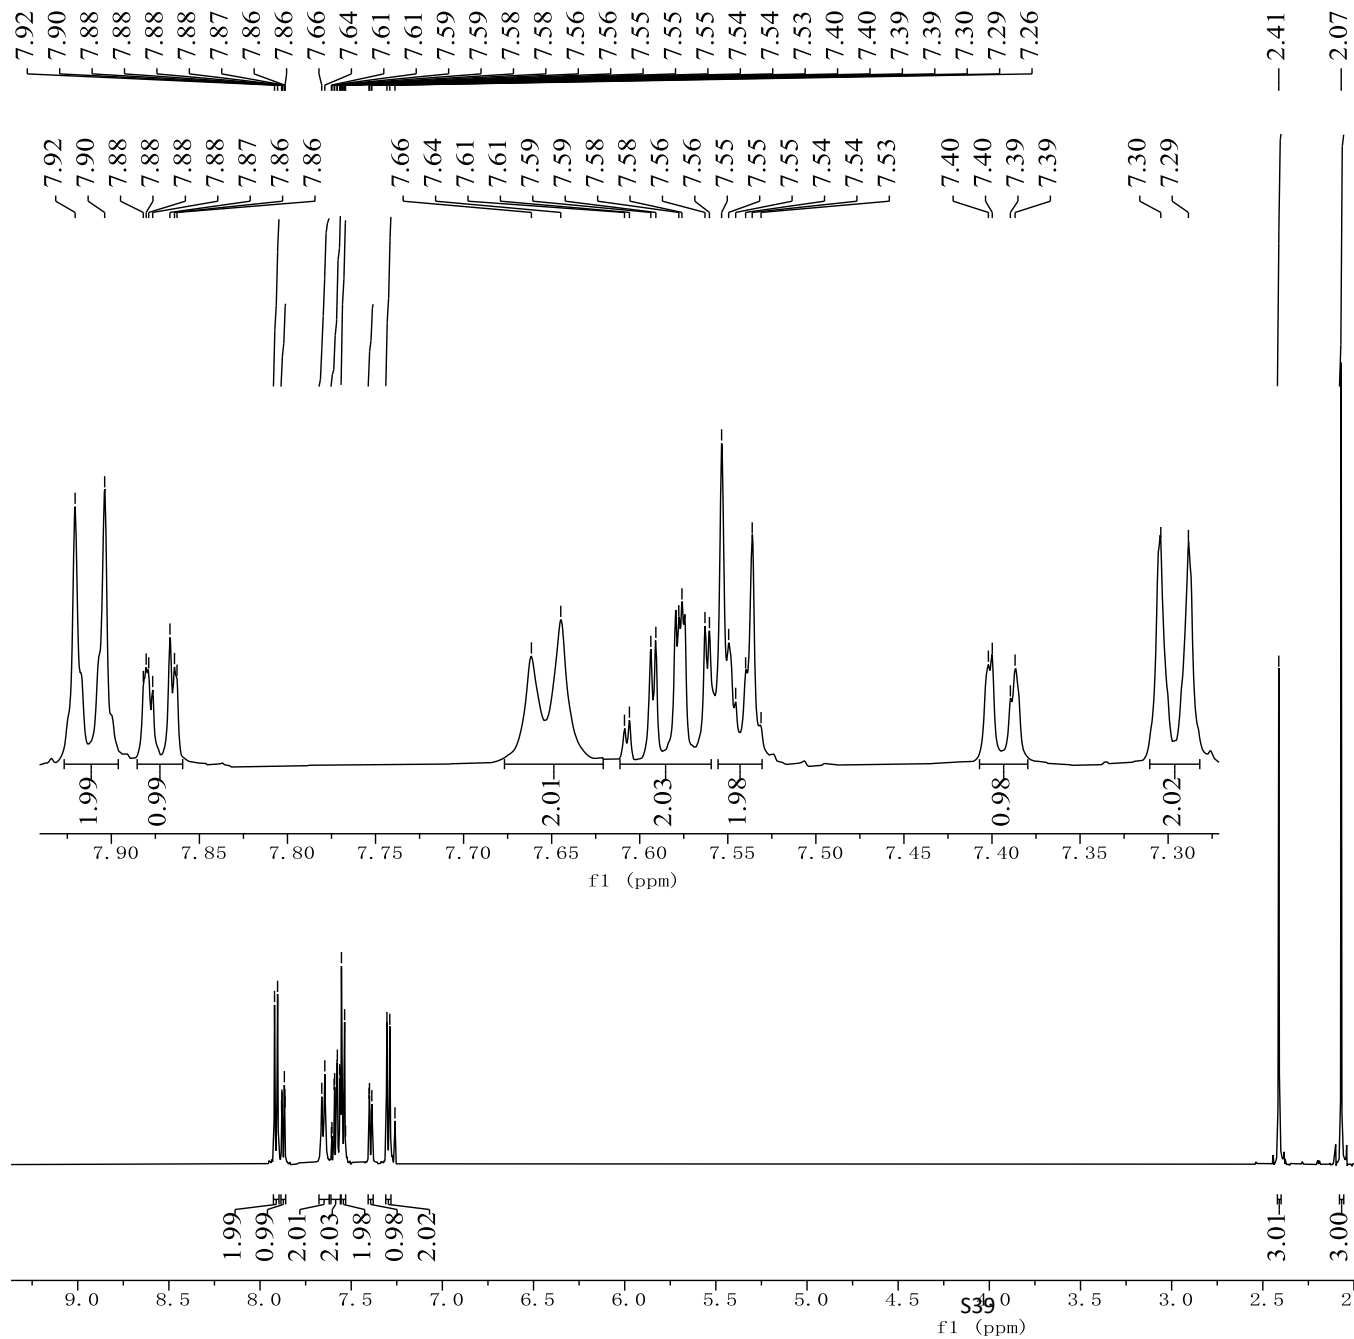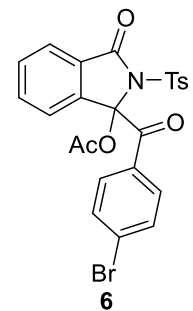

<sup>1</sup>H NMR(500 MHz, CDCl<sub>3</sub>)

-189.55

167.63

167.16

165.19

145.91

140.69

135.08

134.89

133.46

132.00

131.49

131.11

130.12

129.49

128.95

128.58

125.52

122.74

94.49

77.16

-21.83

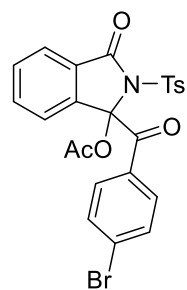

**6**

<sup>13</sup>C NMR(126 MHz, CDCl<sub>3</sub>)

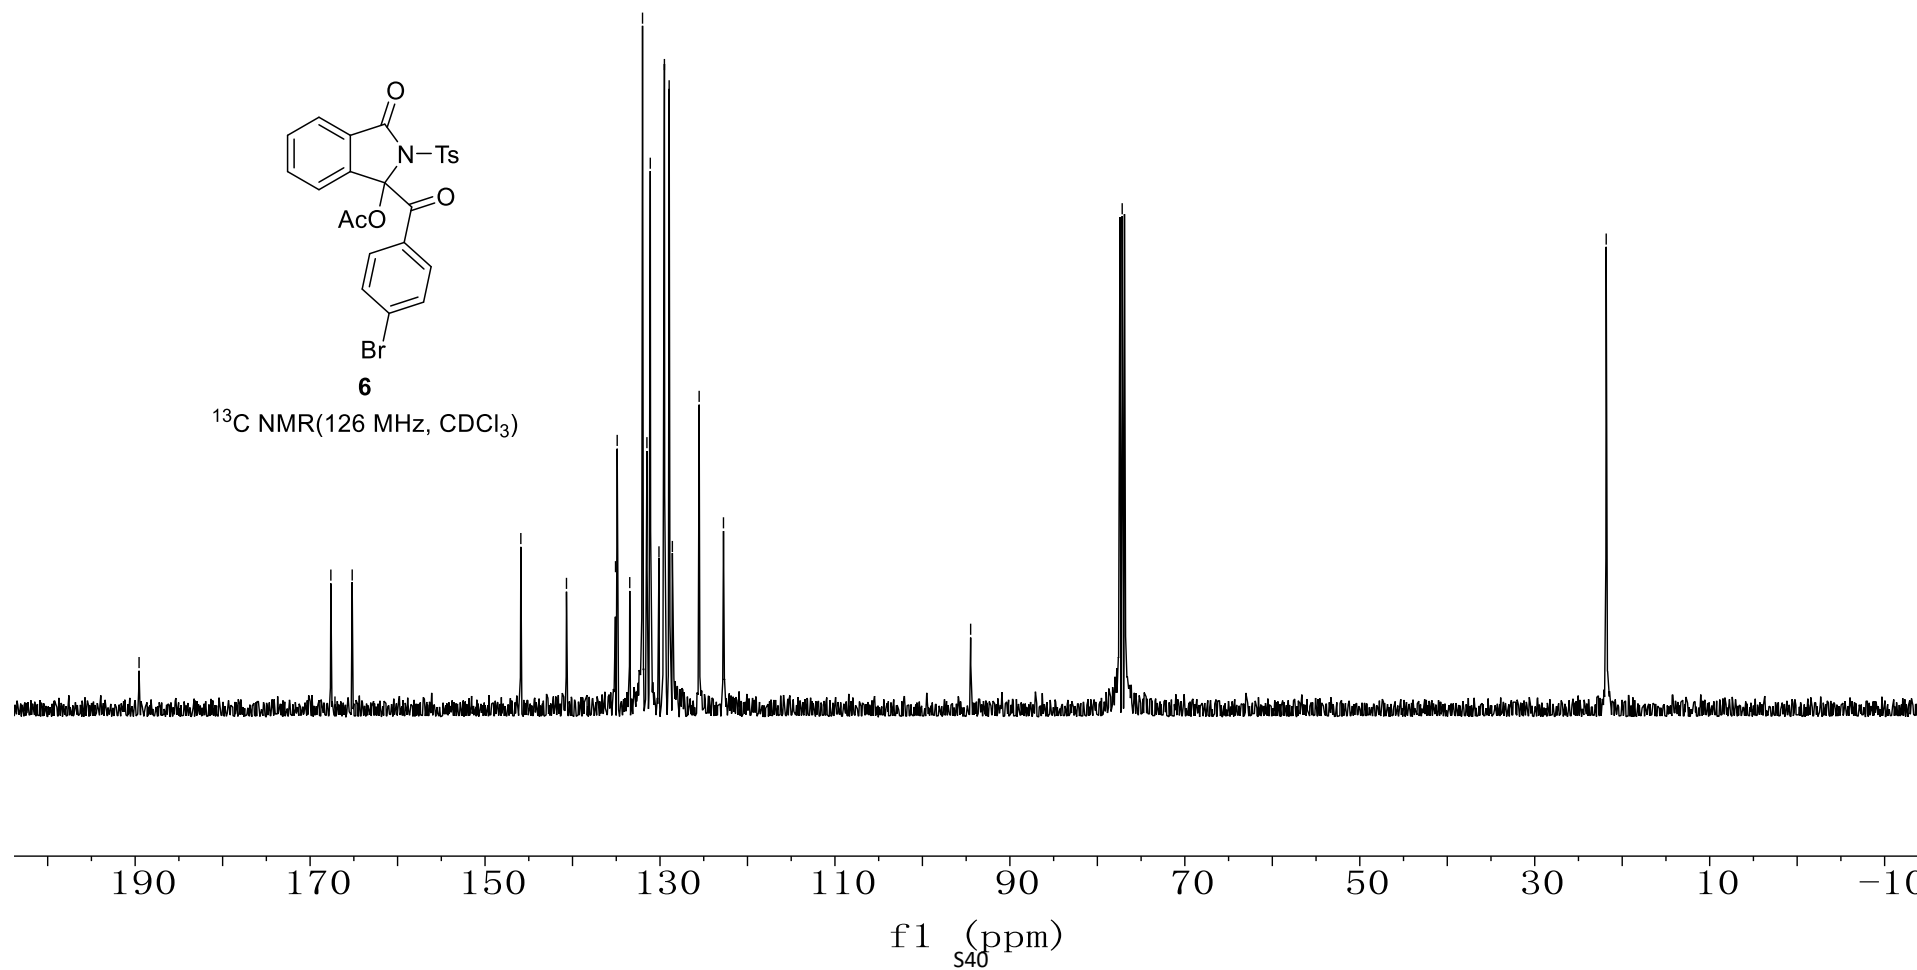



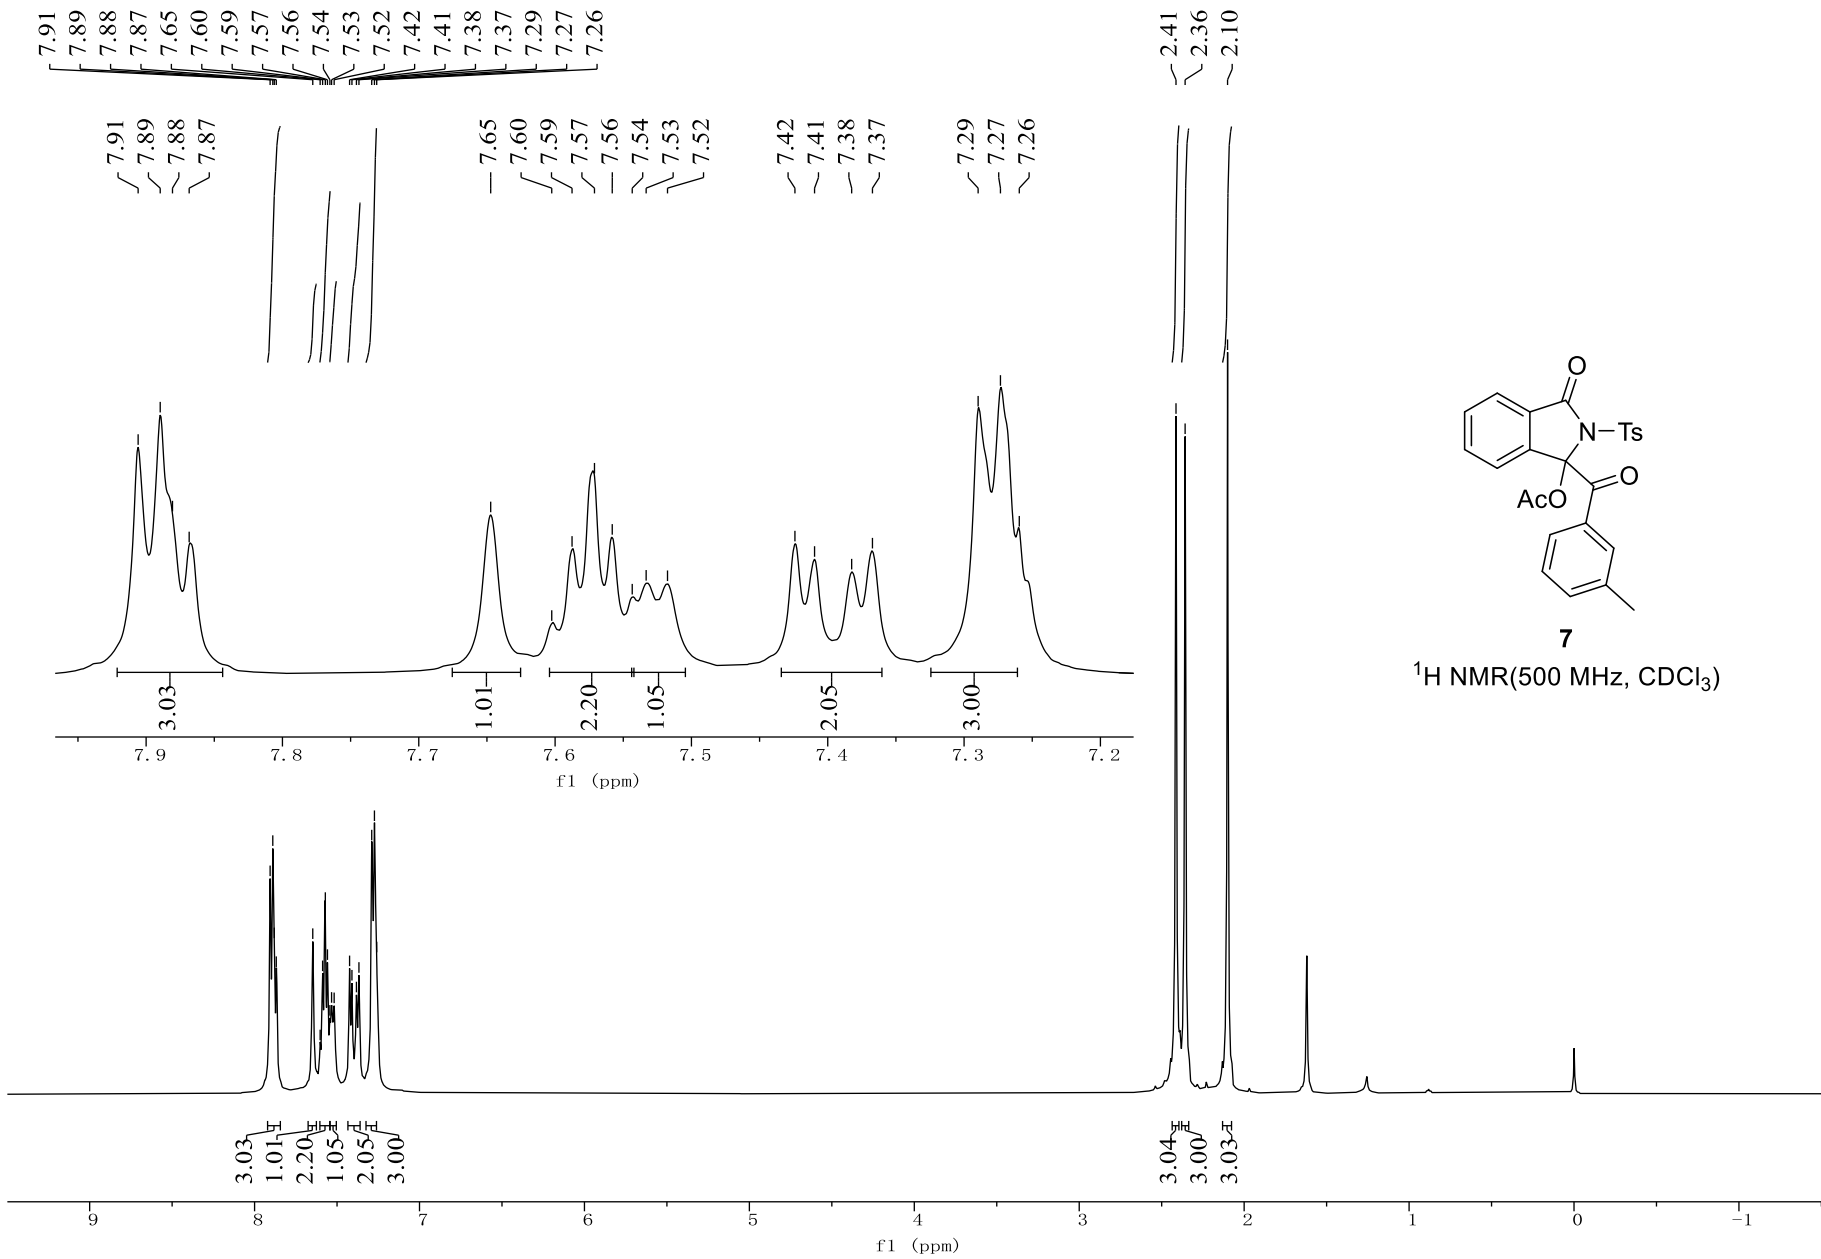

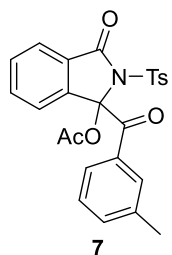

<sup>13</sup>C NMR (126 MHz, CDCl<sub>3</sub>)

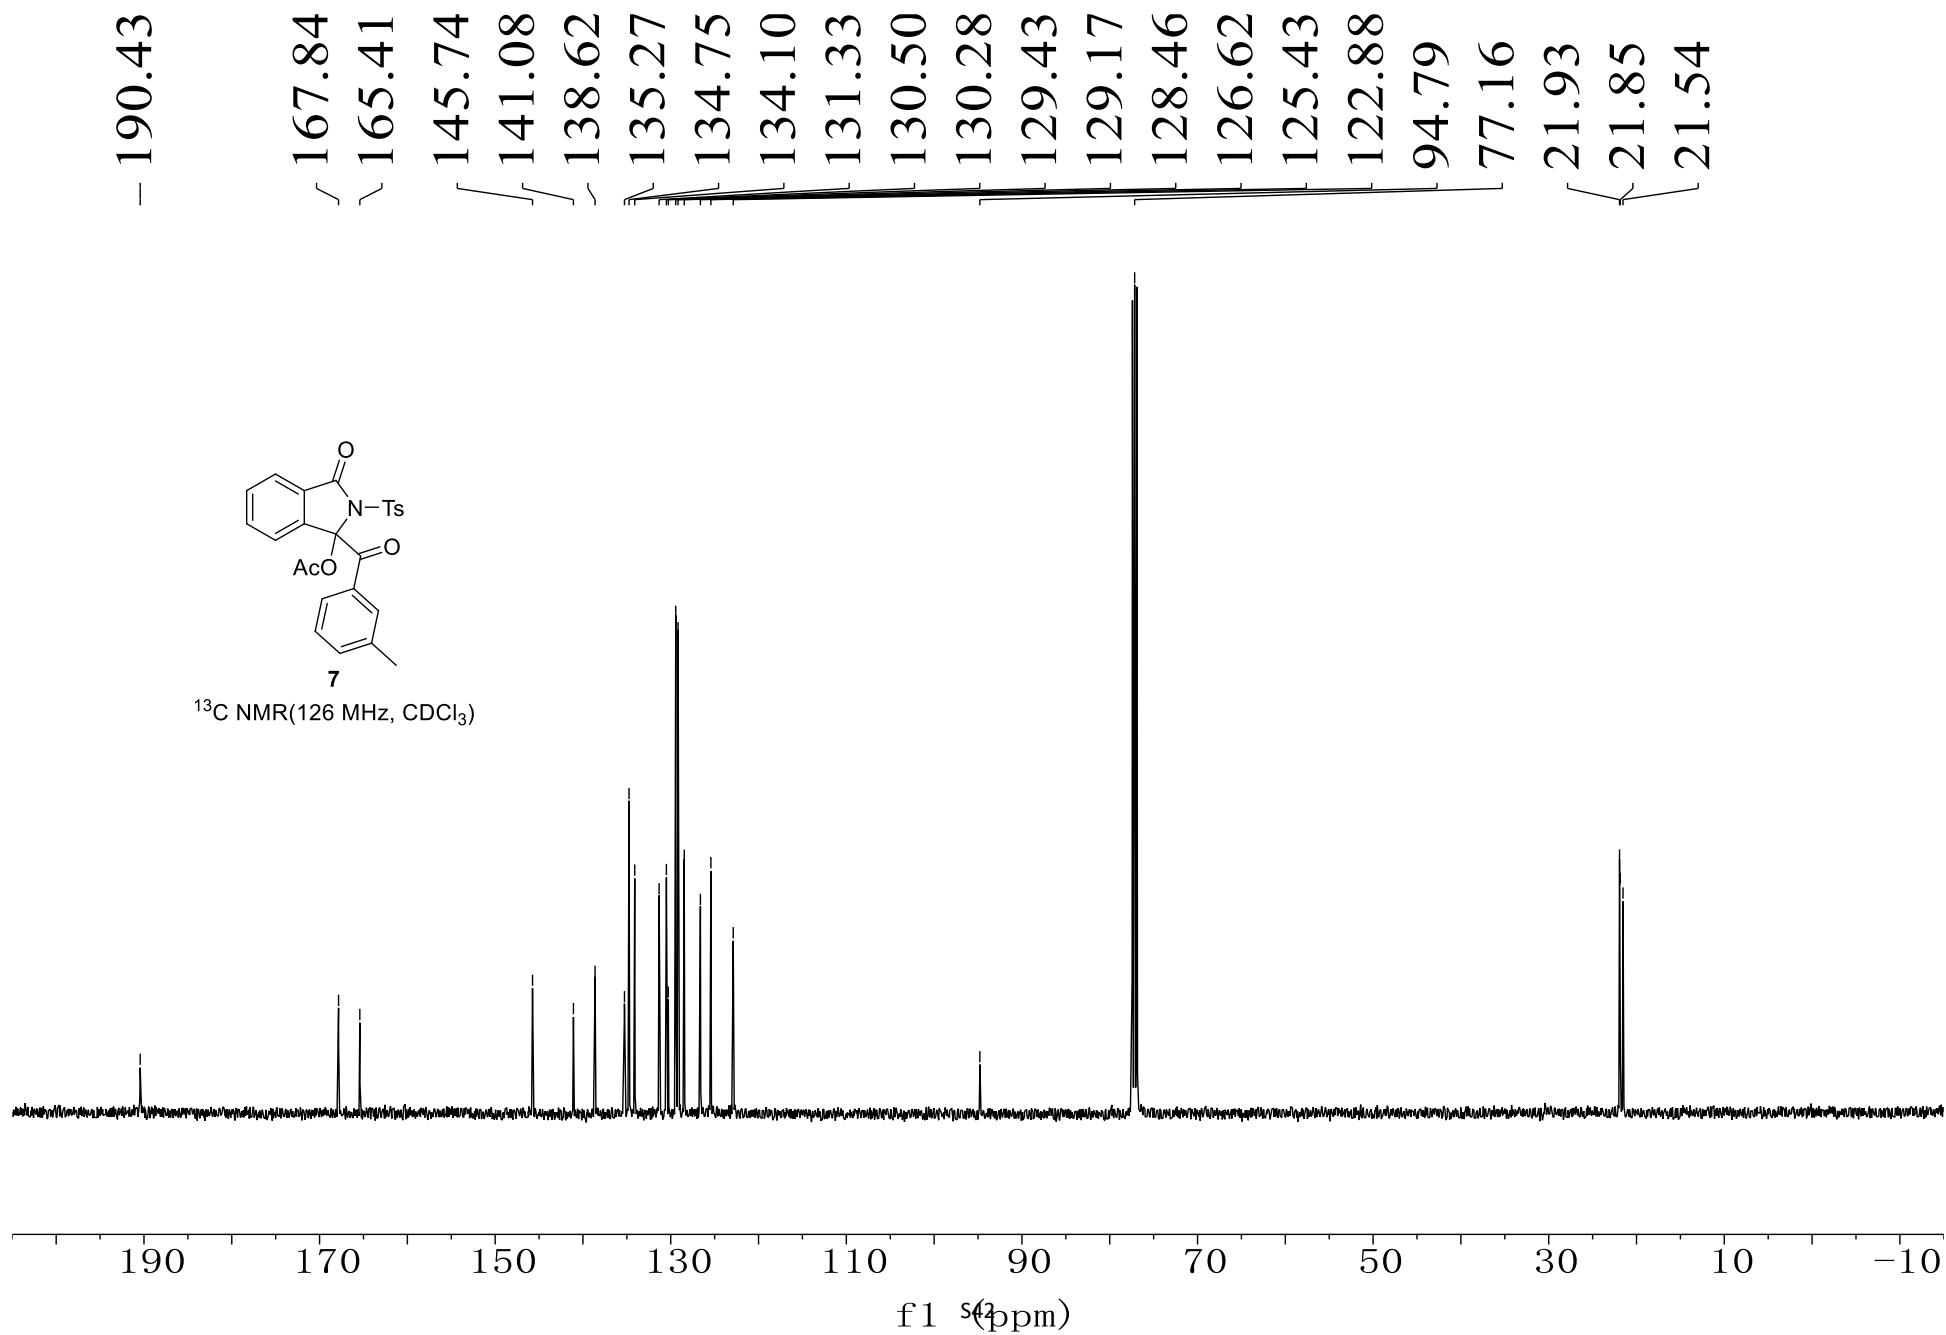

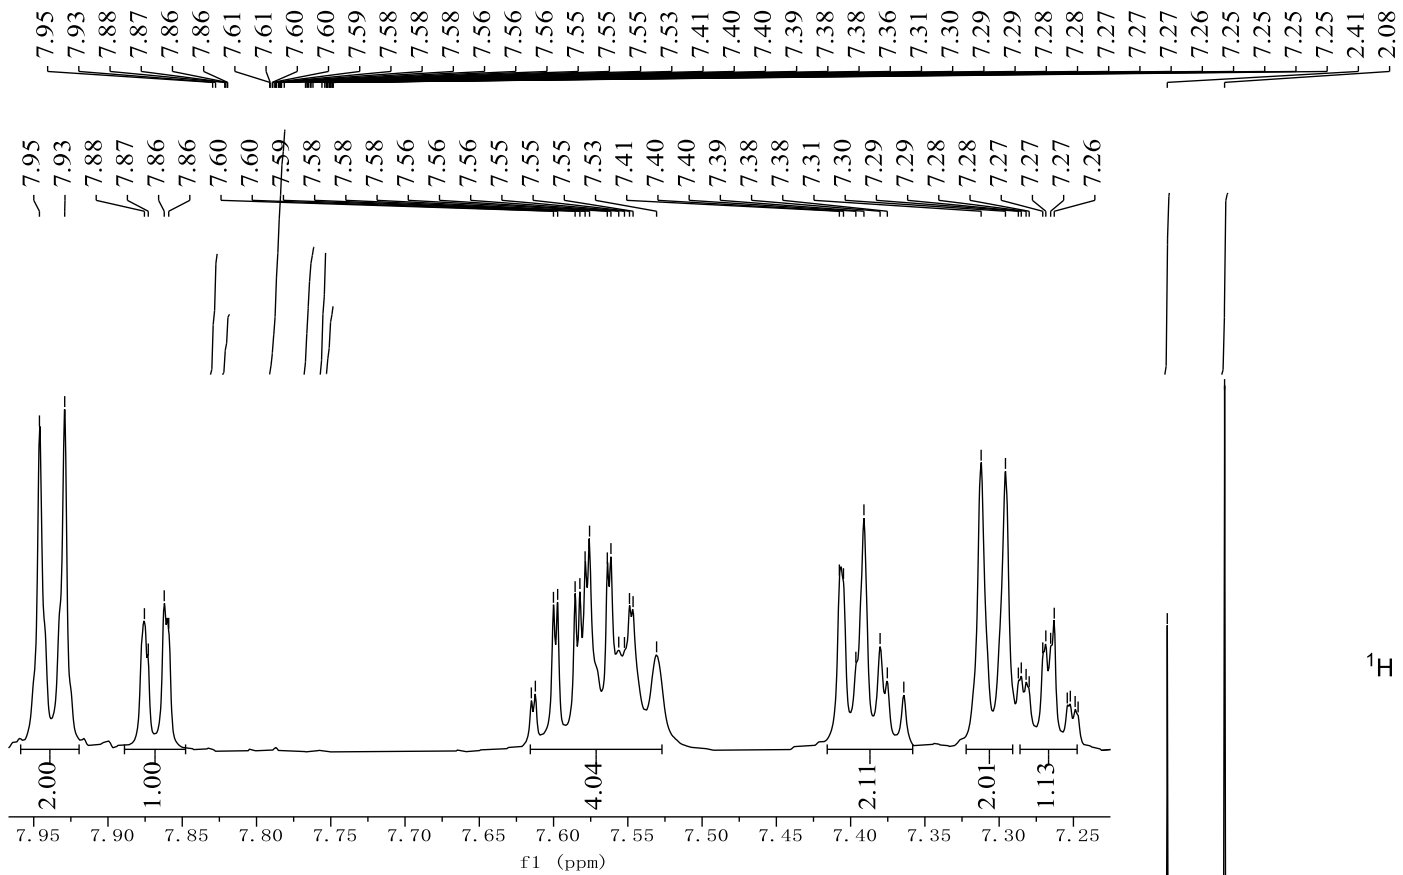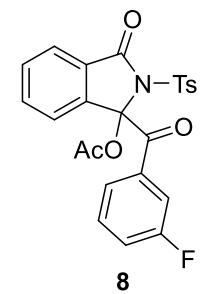

<sup>1</sup>H NMR (500 MHz, CDCl<sub>3</sub>)

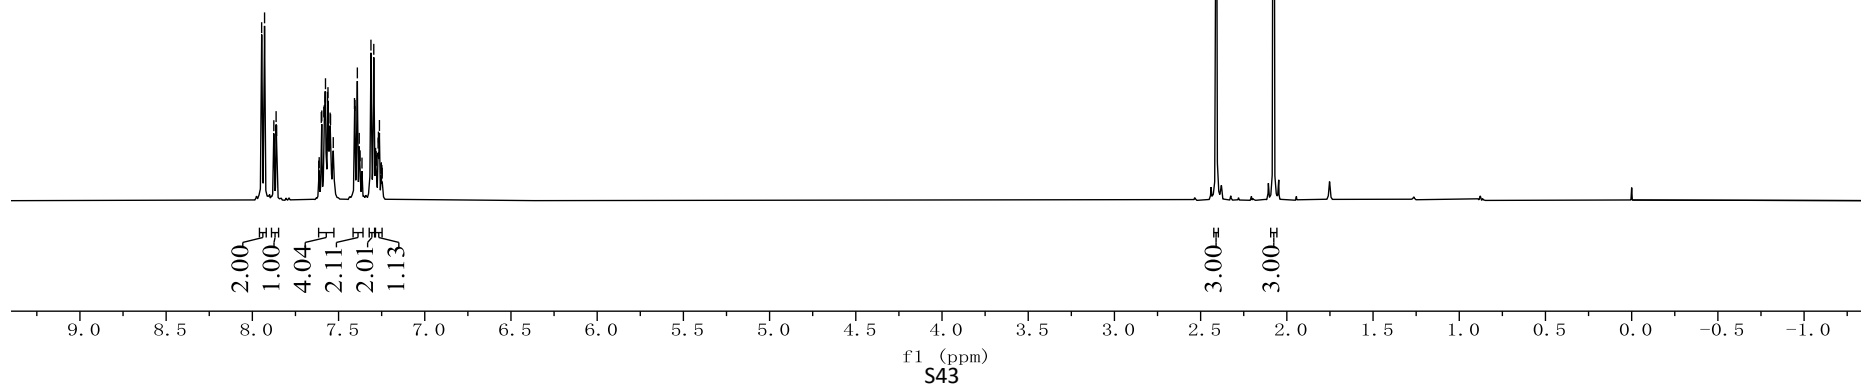

189.47  
167.55  
165.14  
163.37  
161.39

145.91  
140.65  
136.58  
135.10  
134.88  
131.49  
130.42  
130.36  
130.11  
129.49  
128.93  
125.50  
125.25  
125.23  
122.62  
120.44  
120.27  
116.87  
116.69  
94.56  
77.16  
71.78

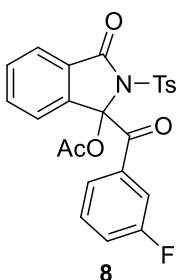

<sup>13</sup>C NMR(126 MHz, CDCl<sub>3</sub>)

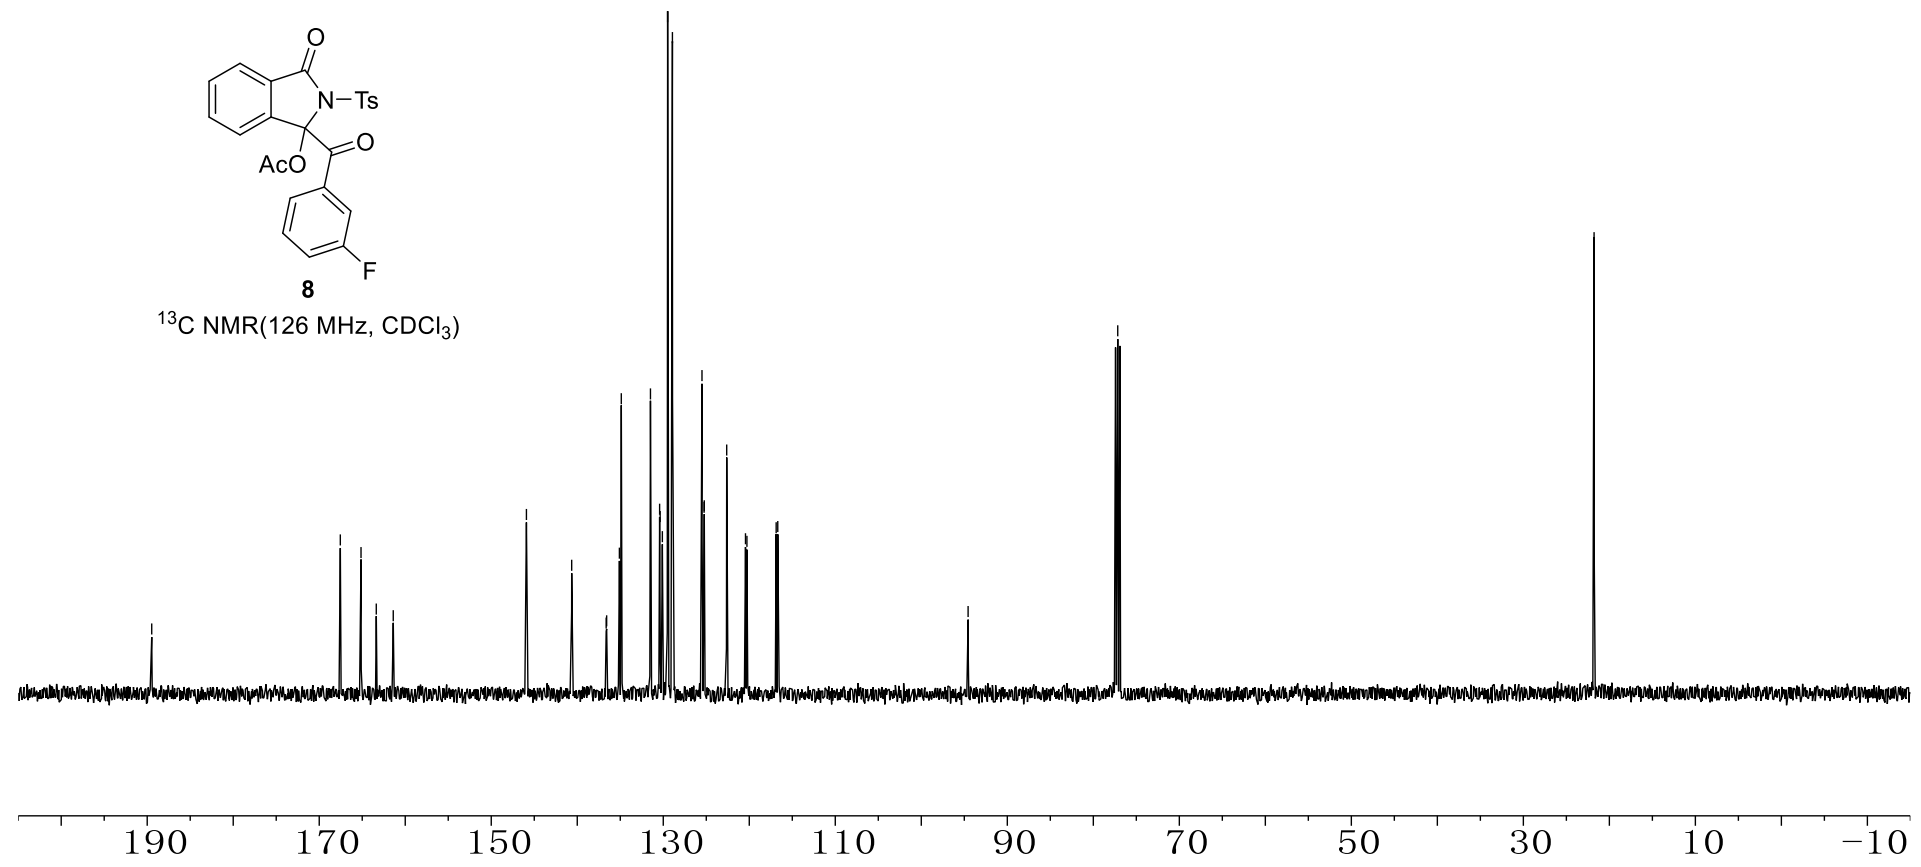

f1 (ppm)  
S44

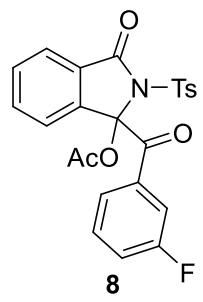

$^{19}\text{F}$  NMR(471 MHz,  $\text{CDCl}_3$ )

--110.86

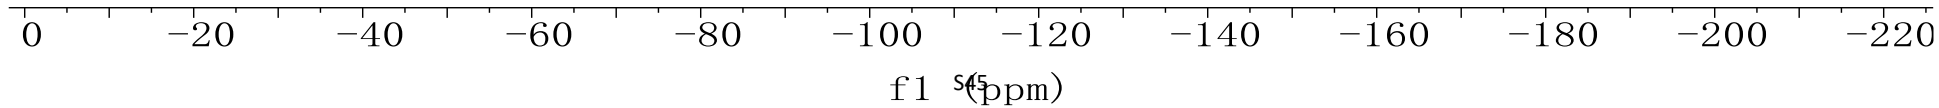

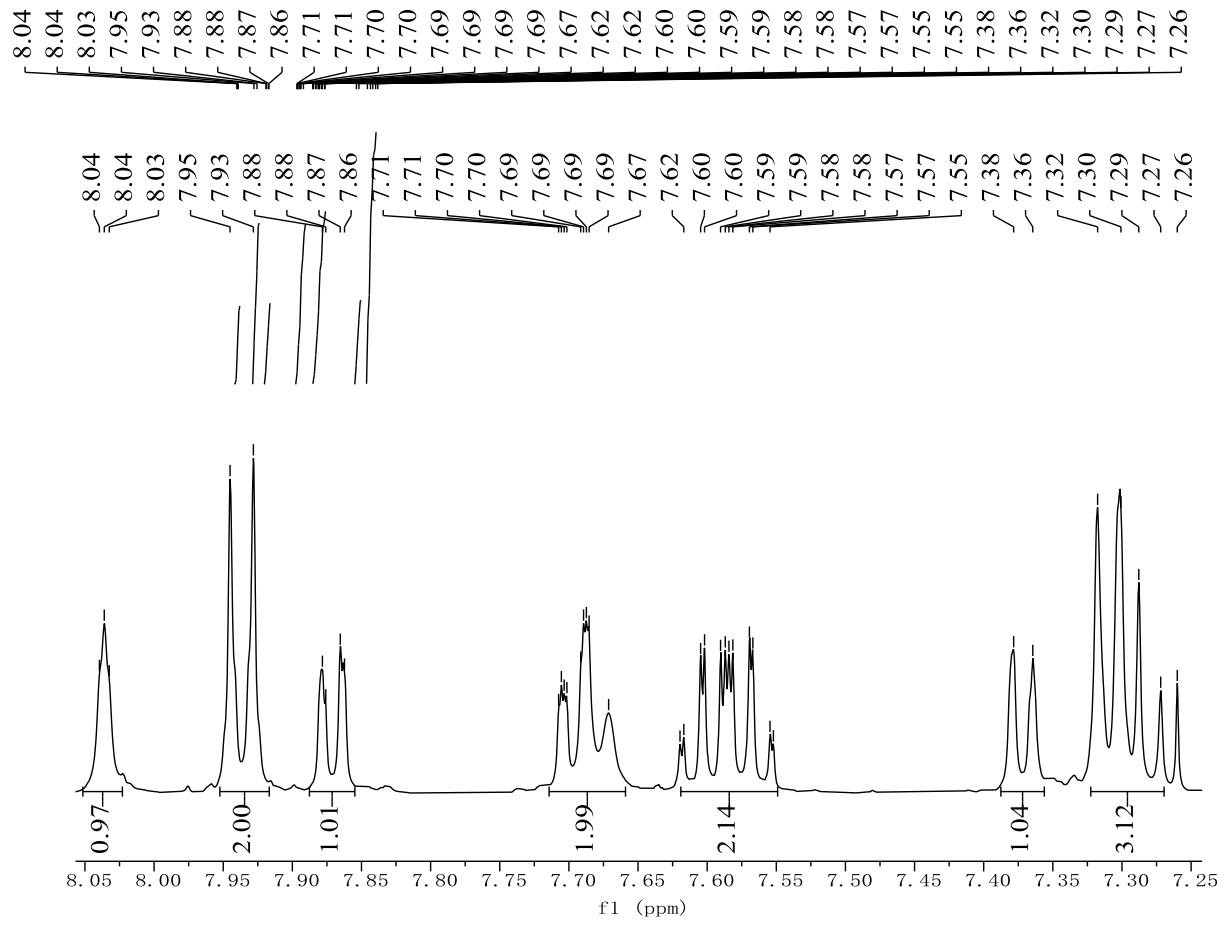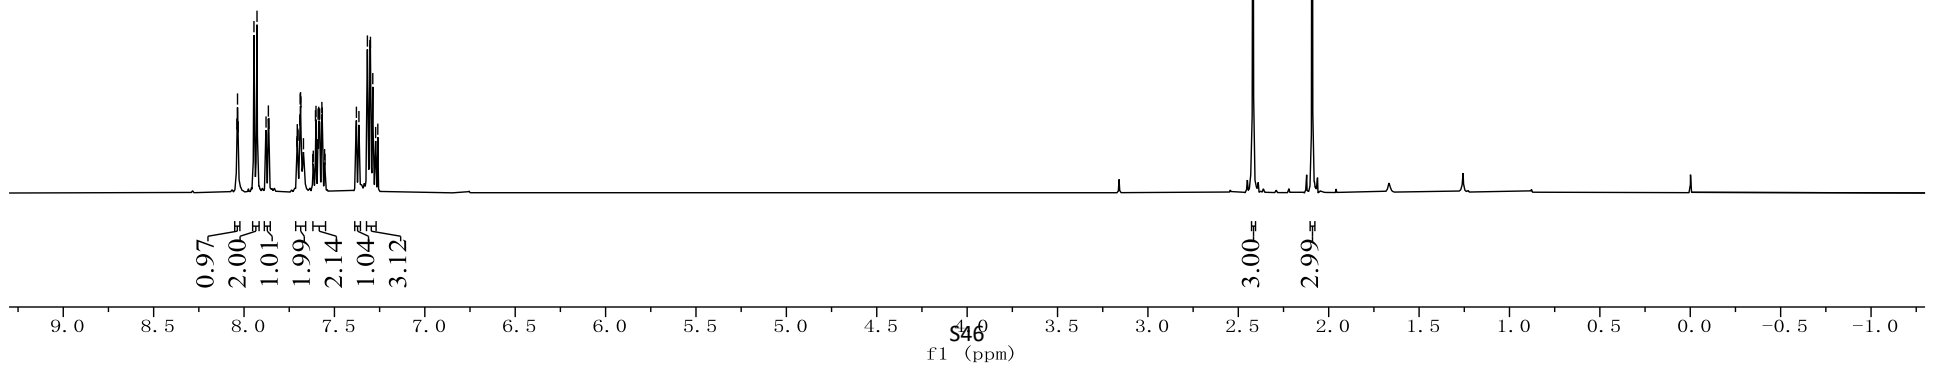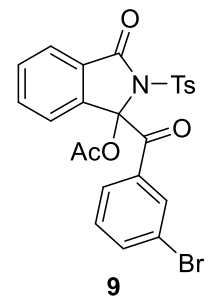

<sup>1</sup>H NMR(500 MHz, CDCl<sub>3</sub>)

189.66  
167.53  
165.13  
145.94  
140.73  
136.57  
136.13  
135.09  
134.89  
132.91  
131.50  
130.18  
130.14  
129.53  
129.04  
127.97  
125.56  
122.83  
122.53  
94.58  
77.16  
21.85

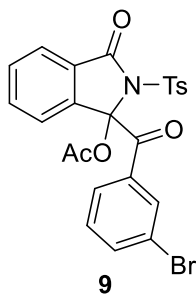

<sup>13</sup>C NMR(126 MHz, CDCl<sub>3</sub>)

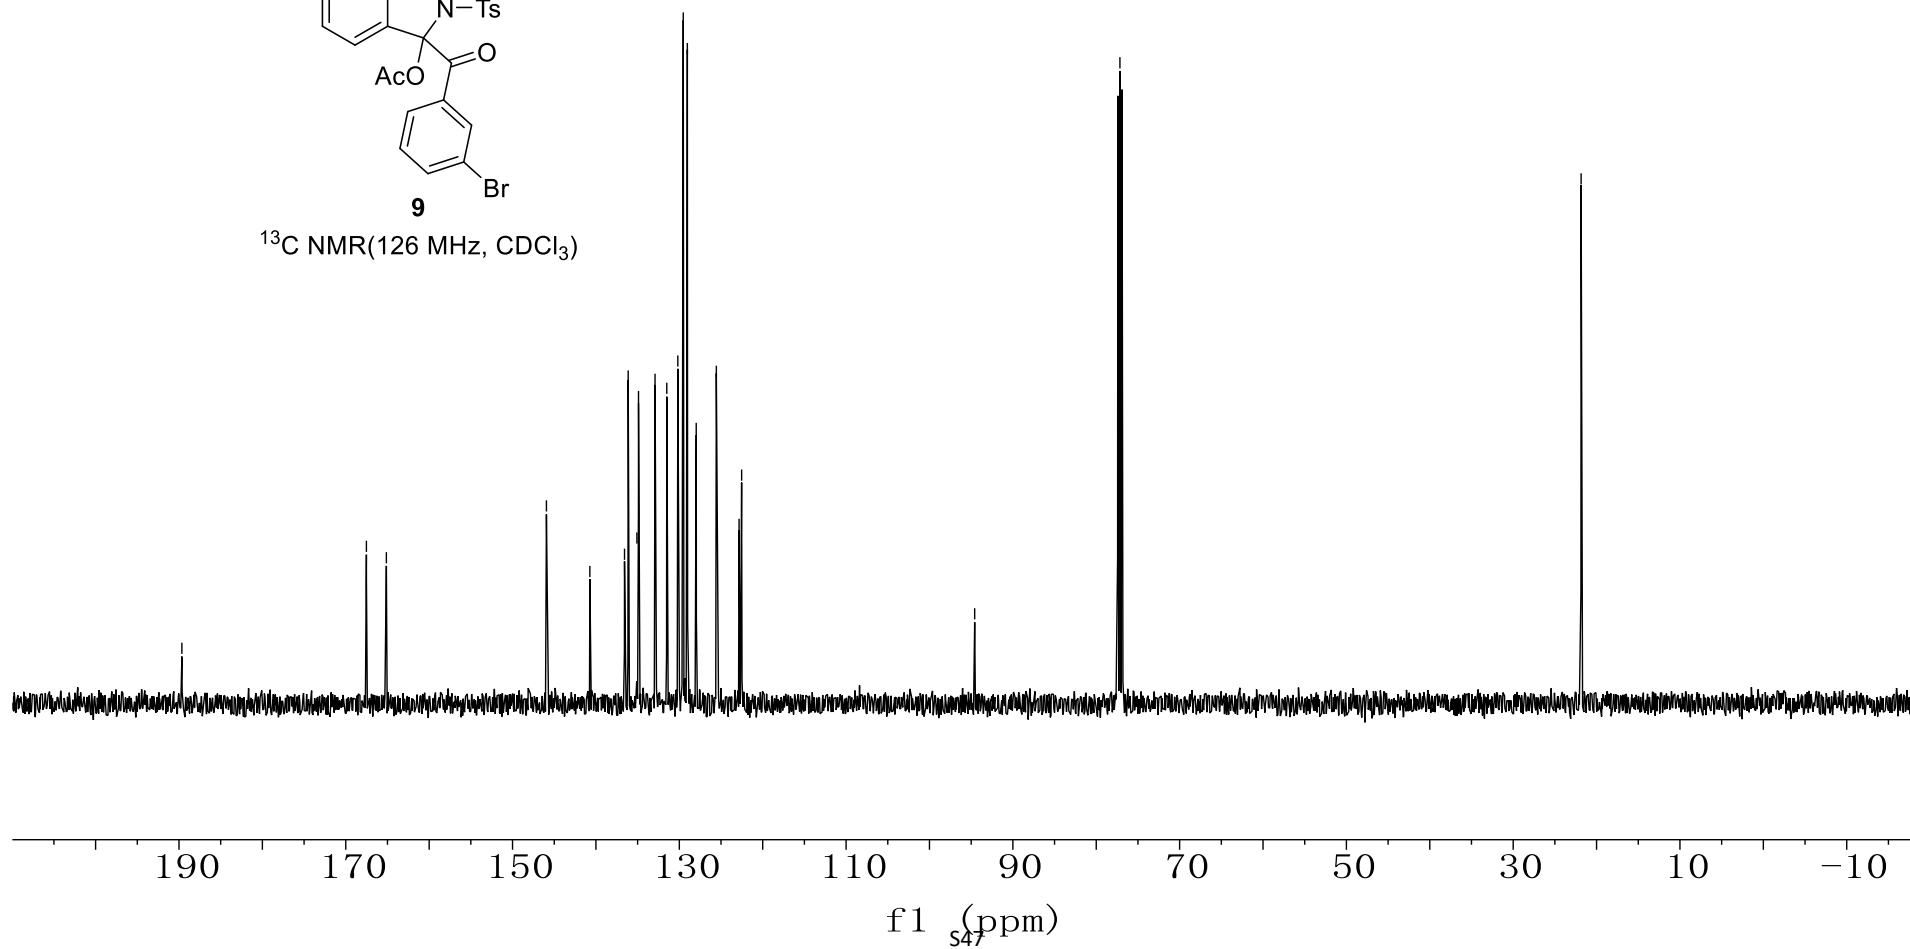

7.95  
7.93  
7.85  
7.85  
7.84  
7.83  
7.83  
7.78  
7.77  
7.76  
7.76  
7.75  
7.74  
7.64  
7.64  
7.62  
7.62  
7.62  
7.61  
7.61  
7.57  
7.57  
7.57  
7.56  
7.56  
7.55  
7.55  
7.55  
7.55  
7.54  
7.54  
7.56  
7.56  
7.55  
7.55  
7.55  
7.55  
7.54  
7.54  
7.32  
7.30  
7.30  
7.30  
7.28  
7.28  
7.27  
7.27  
7.26  
7.16  
7.16  
7.16  
7.16  
7.14  
7.14  
2.42  
2.02

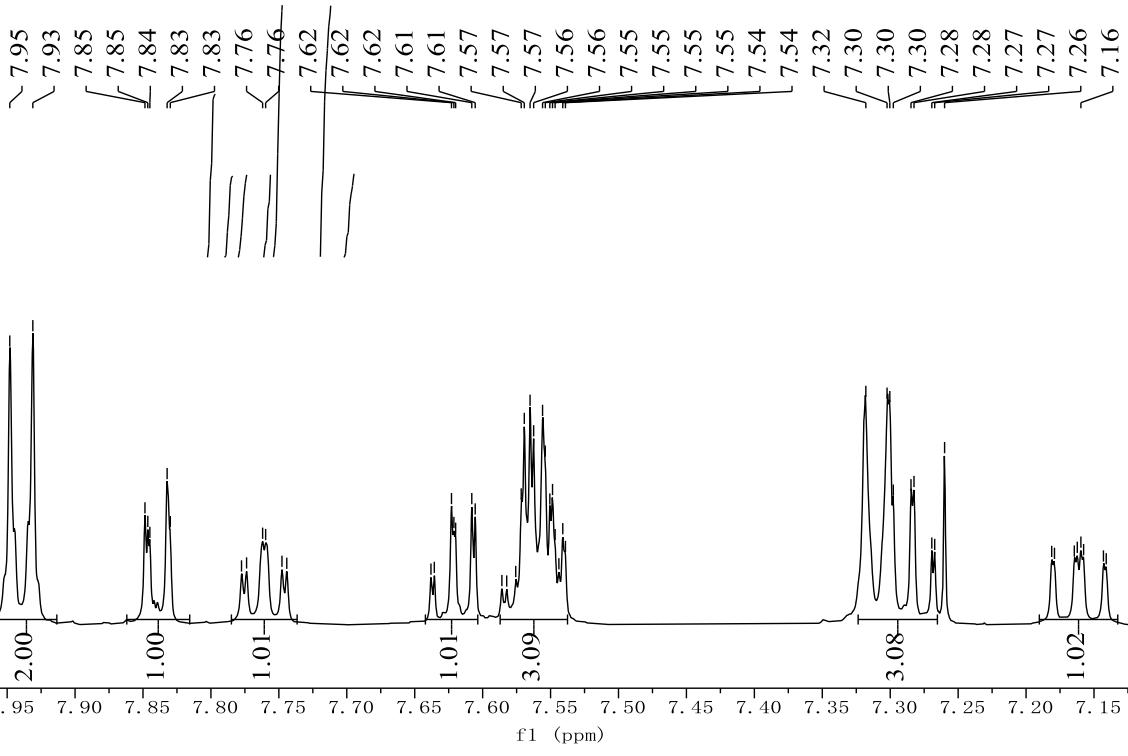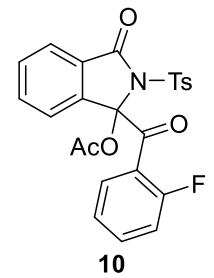

<sup>1</sup>H NMR(500 MHz, CDCl<sub>3</sub>)

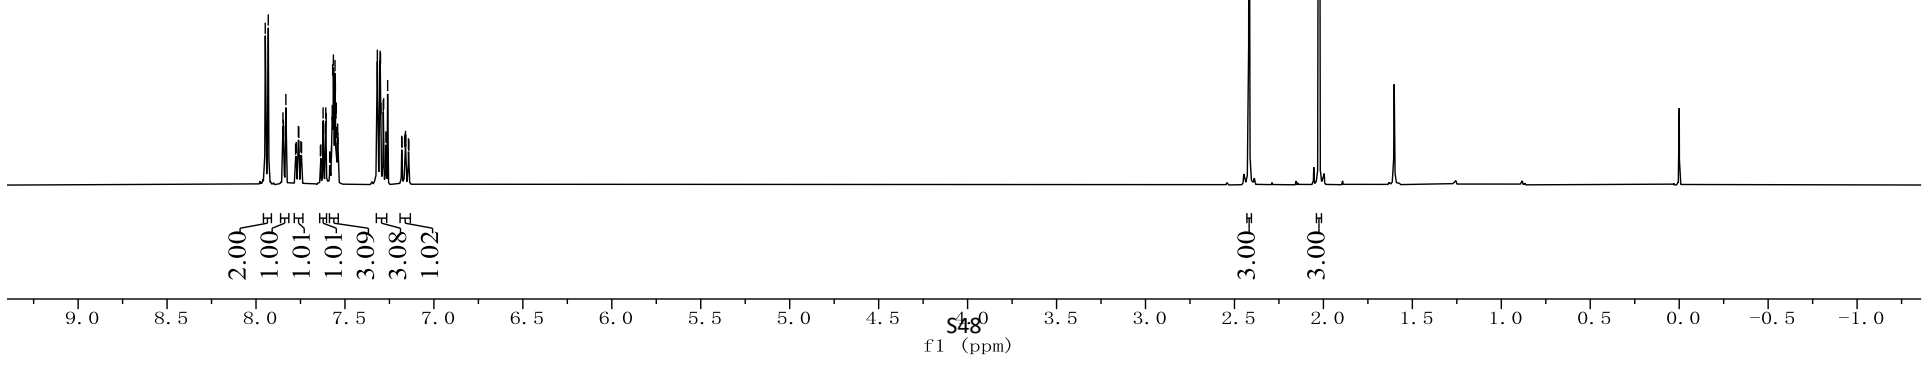



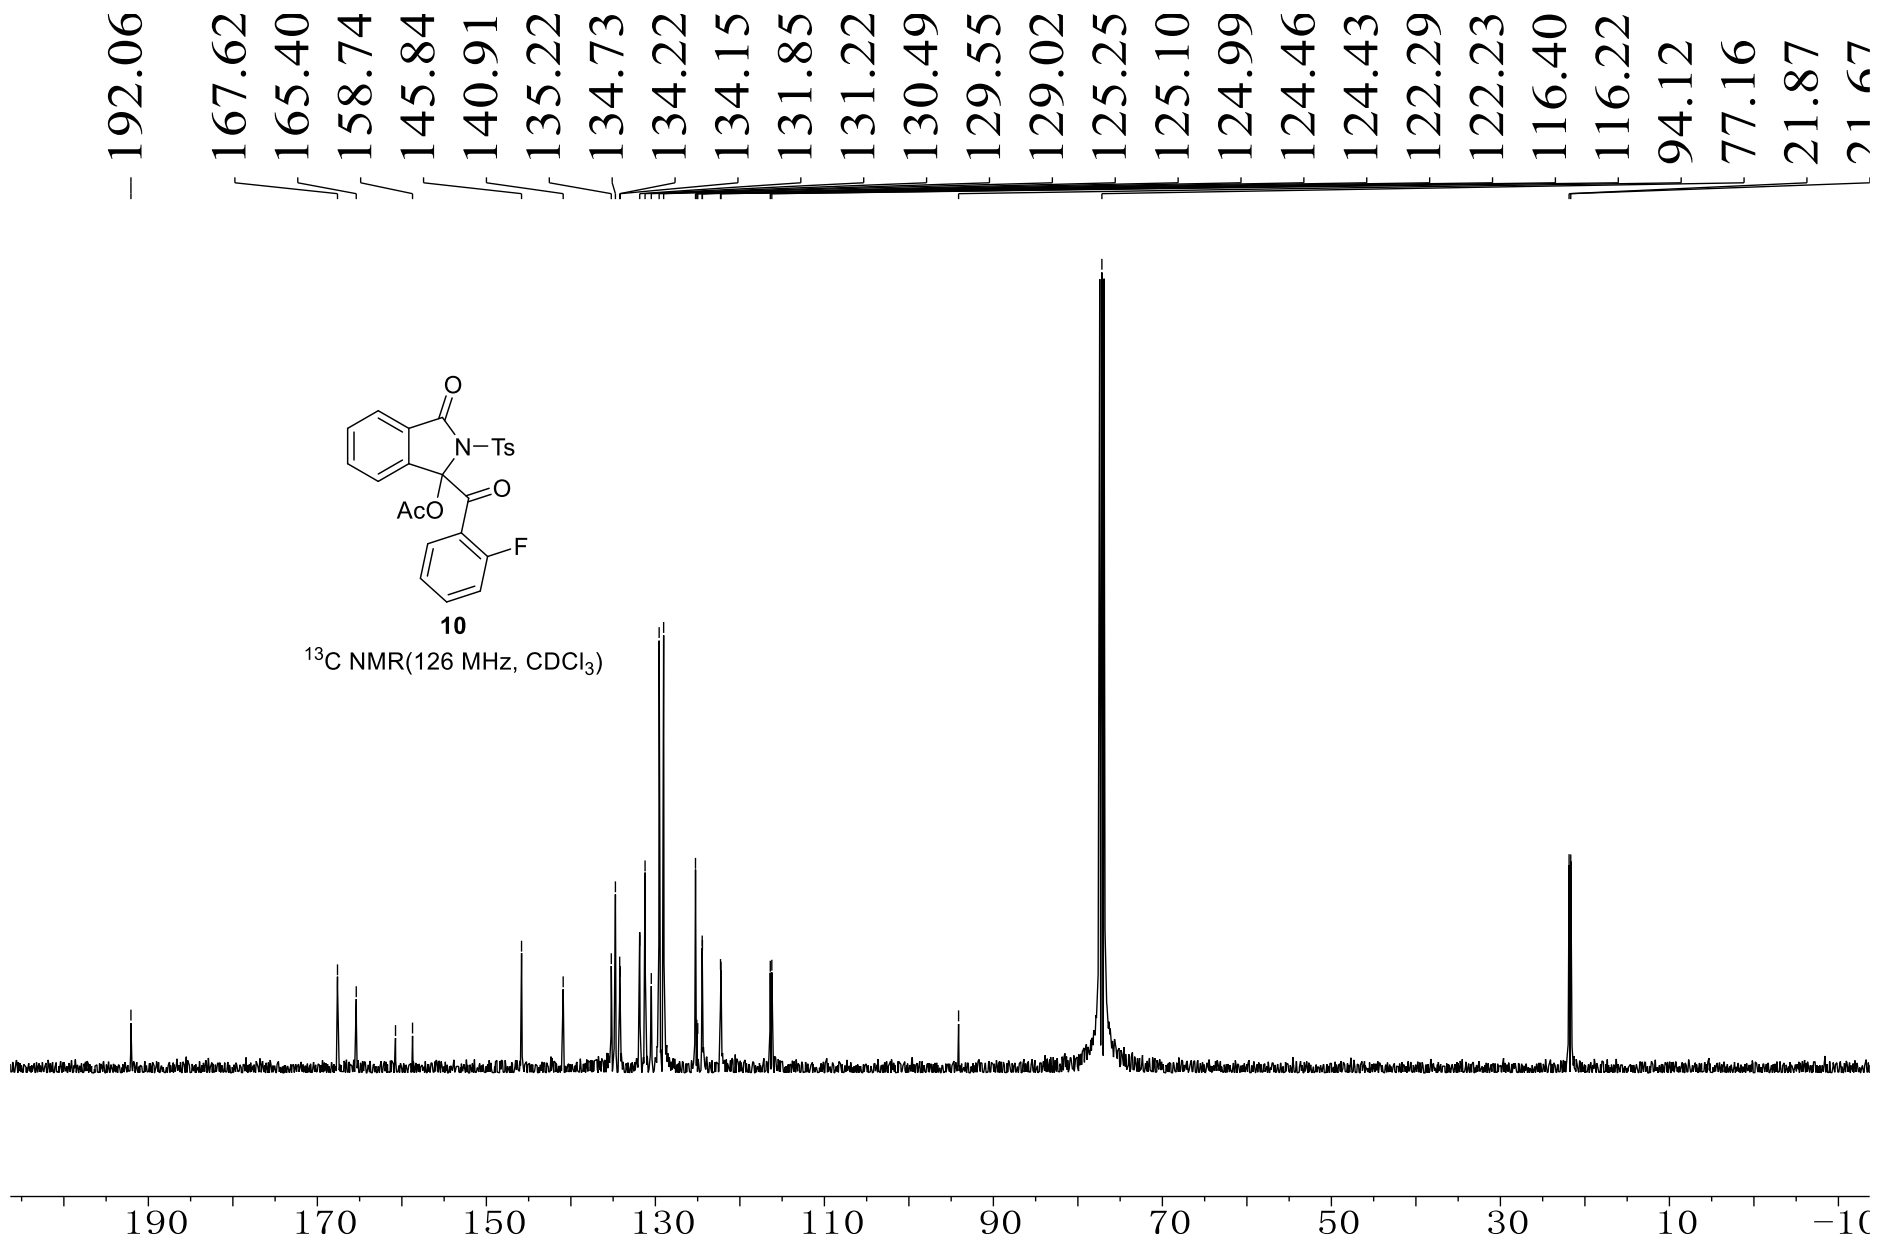

f1 (ppm)

S49

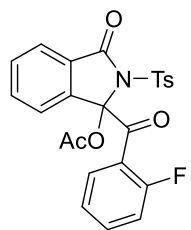

**10**

<sup>19</sup>F NMR(471 MHz, CDCl<sub>3</sub>)

— -109.18

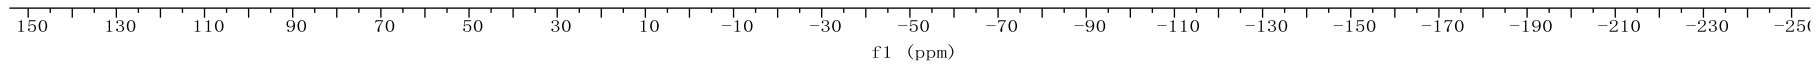

8.03  
8.02  
8.02  
8.01  
8.01  
8.01  
8.00  
8.00  
7.82  
7.81  
7.61  
7.61  
7.60  
7.59  
7.58  
7.58  
7.56  
7.55  
7.54  
7.54  
7.52  
7.52  
7.50  
7.50  
7.49  
7.48  
7.47  
7.47  
7.41  
7.41  
7.39  
7.39  
7.38  
7.38  
7.36  
7.34  
7.32  
7.26  
2.43  
2.08

8.03  
8.02  
8.02  
8.01  
8.01  
8.01  
8.00  
8.00  
7.82  
7.81  
7.60  
7.59  
7.58  
7.58  
7.56  
7.55  
7.54  
7.54  
7.52  
7.52  
7.50  
7.50  
7.49  
7.48  
7.47  
7.47  
7.41  
7.41  
7.39  
7.39  
7.38  
7.38  
7.36  
7.34  
7.32

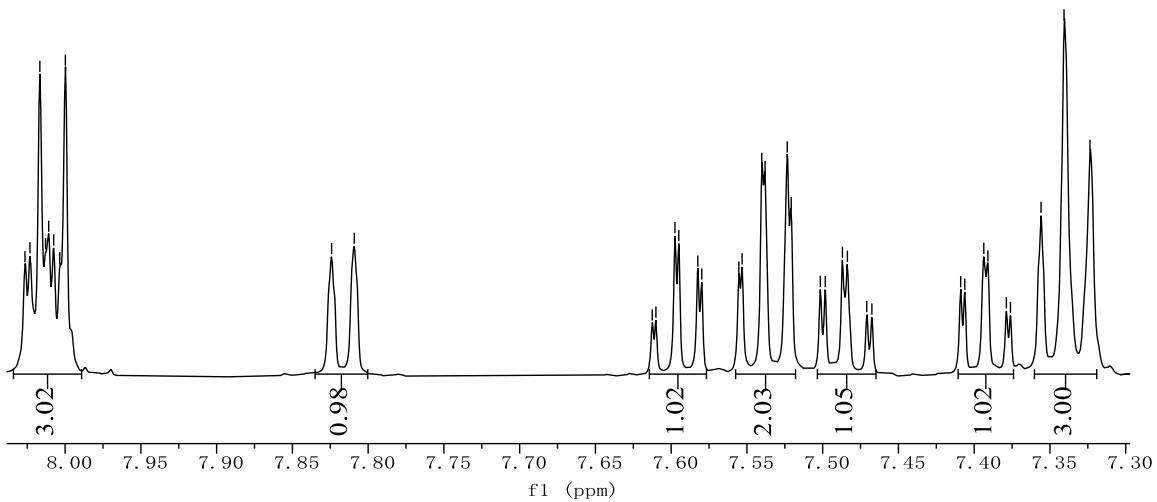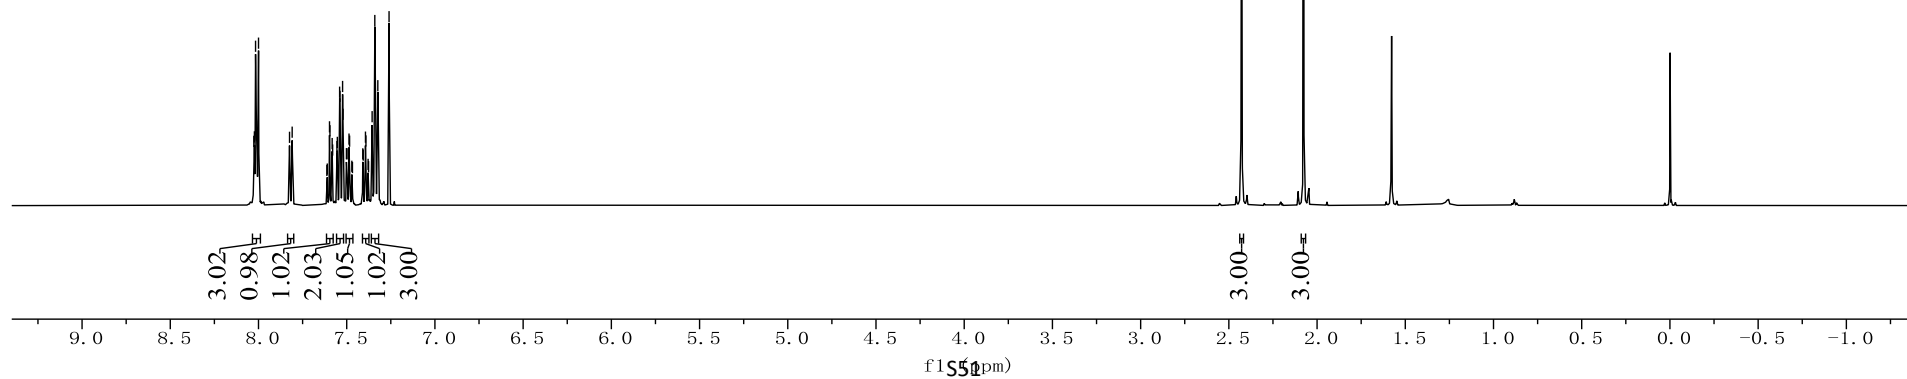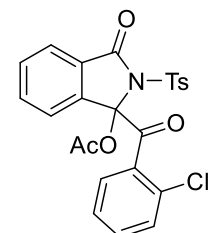

**11**

$^1\text{H NMR}$ (500 MHz,  $\text{CDCl}_3$ )

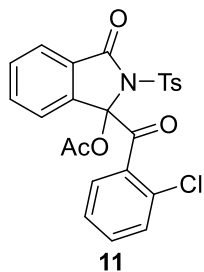

<sup>13</sup>C NMR (126 MHz, CDCl<sub>3</sub>)

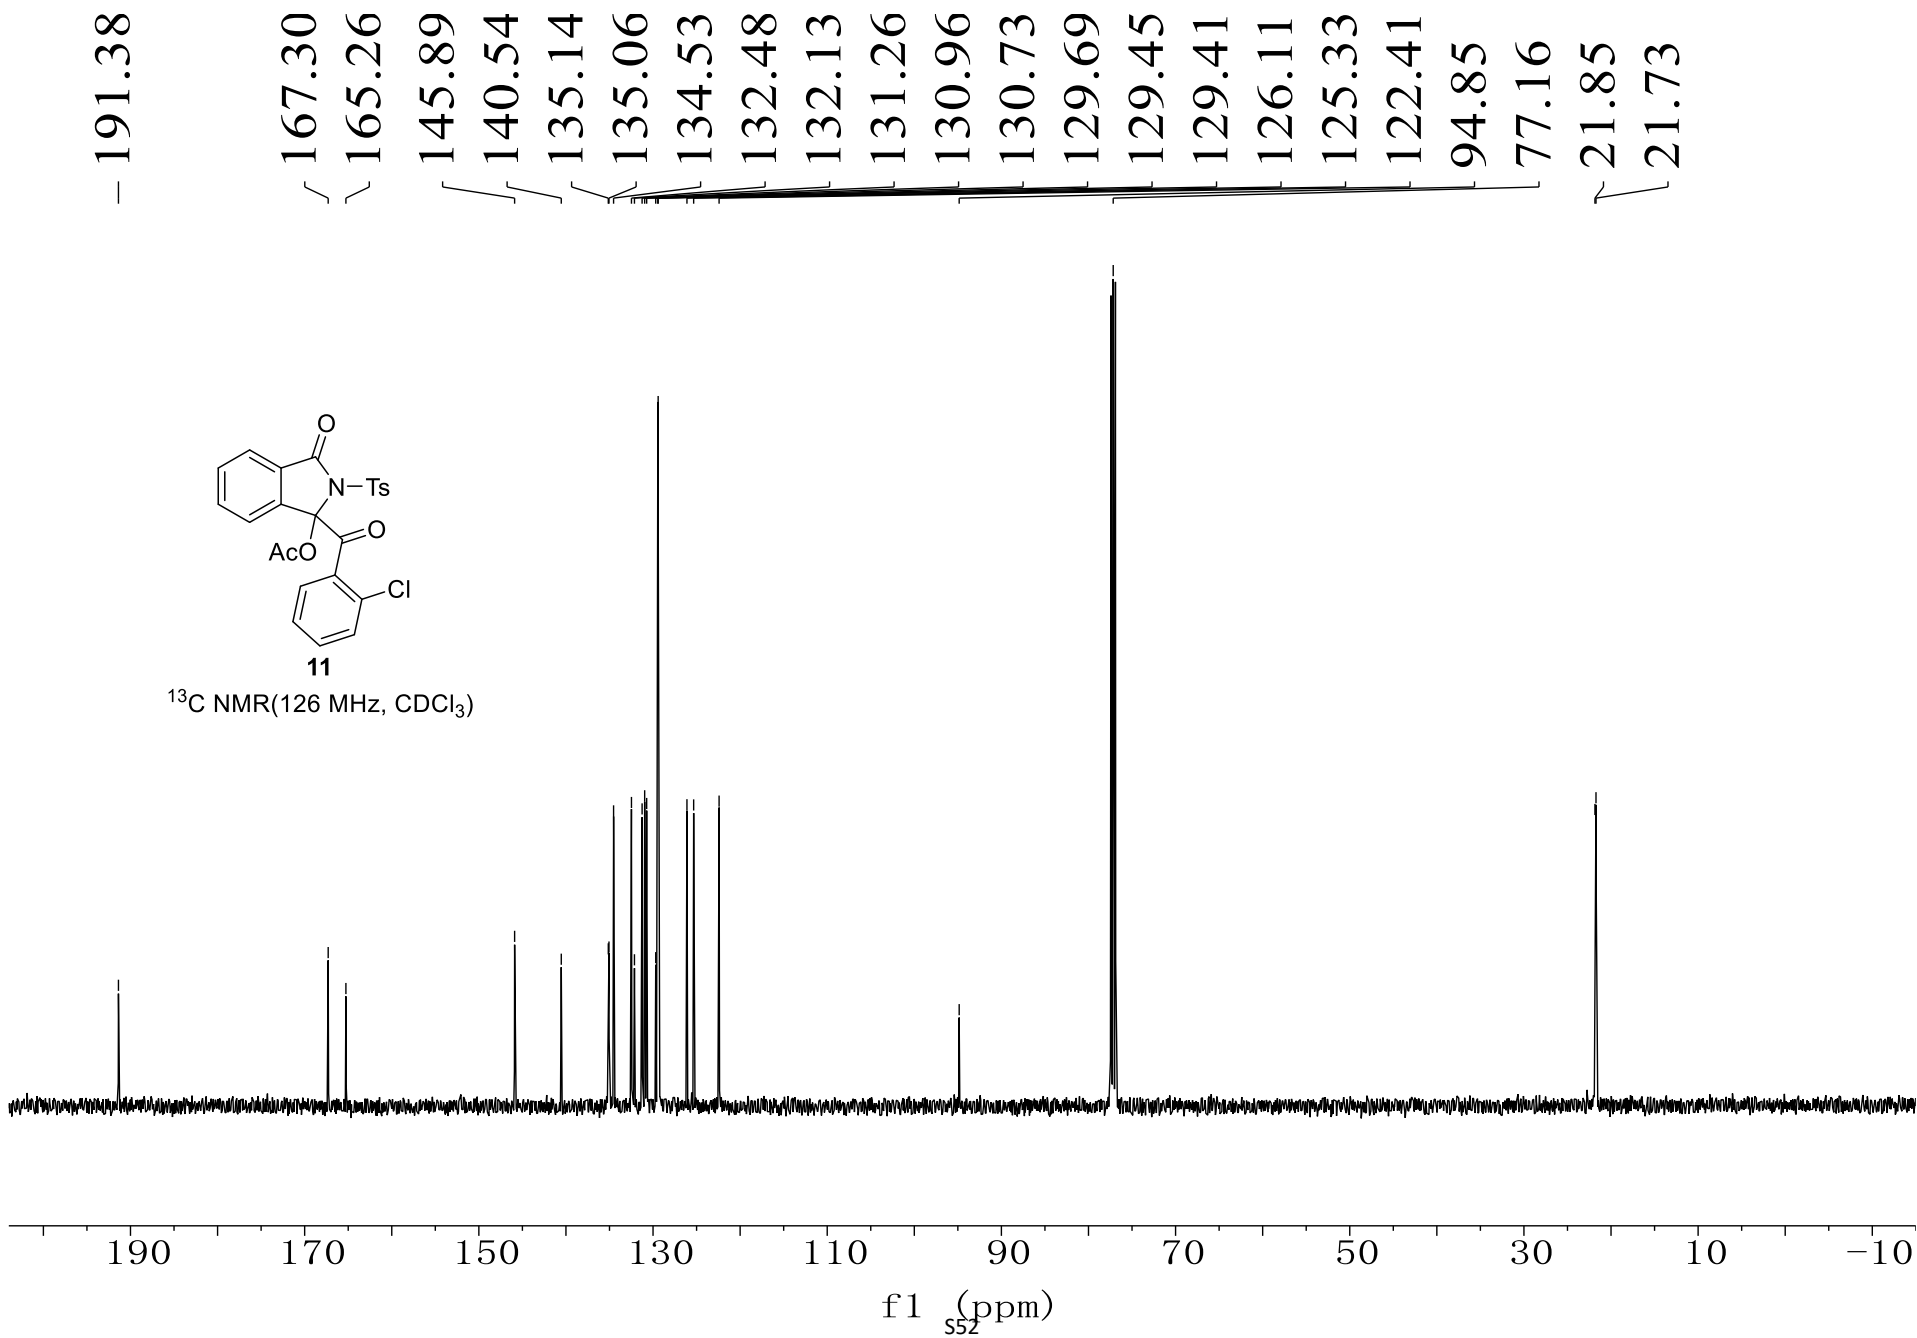

8.08  
8.08  
8.07  
8.06  
8.06  
8.02  
8.00  
8.00  
7.81  
7.80  
7.80  
7.73  
7.73  
7.72  
7.72  
7.72  
7.61  
7.61  
7.60  
7.59  
7.58  
7.58  
7.55  
7.53  
7.52  
7.47  
7.46  
7.45  
7.45  
7.43  
7.43  
7.42  
7.42  
7.40  
7.40  
7.39  
7.39  
7.37  
7.35  
7.34  
7.32  
7.26  
— 2.42  
— 2.08

8.08  
8.08  
8.07  
8.06  
8.02  
8.00  
8.00  
7.81  
7.80  
7.73  
7.73  
7.72  
7.72  
7.72  
7.61  
7.61  
7.60  
7.59  
7.58  
7.58  
7.55  
7.53  
7.52  
7.47  
7.46  
7.45  
7.45  
7.43  
7.43  
7.42  
7.42  
7.40  
7.40  
7.39  
7.39  
7.37  
7.37  
7.35  
7.34  
7.32  
7.32

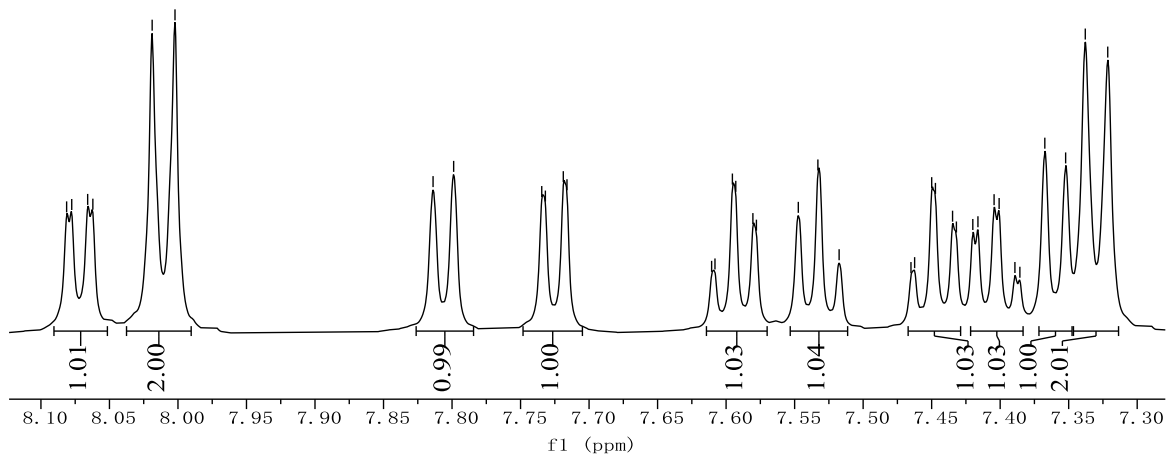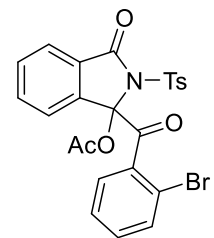

**12**

<sup>1</sup>H NMR(500 MHz, CDCl<sub>3</sub>)

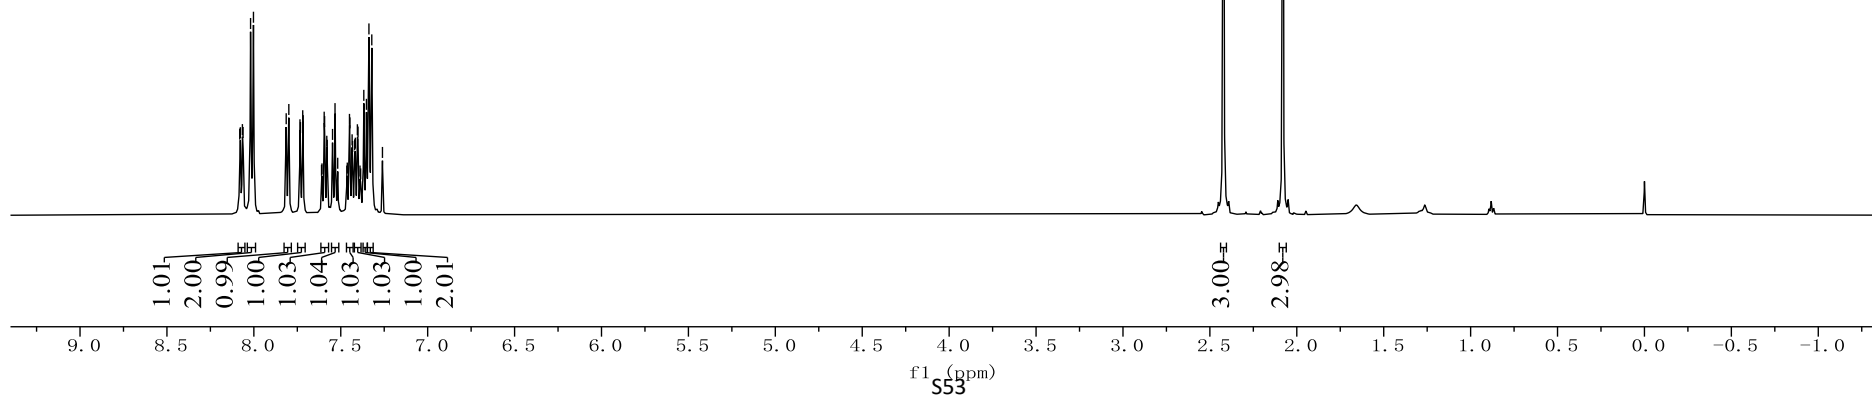

-191.77

167.25

165.26

145.88

140.45

136.93

135.05

134.46

134.38

132.65

131.26

131.03

129.65

129.49

129.44

126.62

125.33

122.69

120.96

94.84

77.16

21.86

21.75

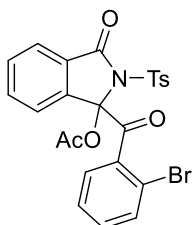

**12**

<sup>13</sup>C NMR(126 MHz, CDCl<sub>3</sub>)

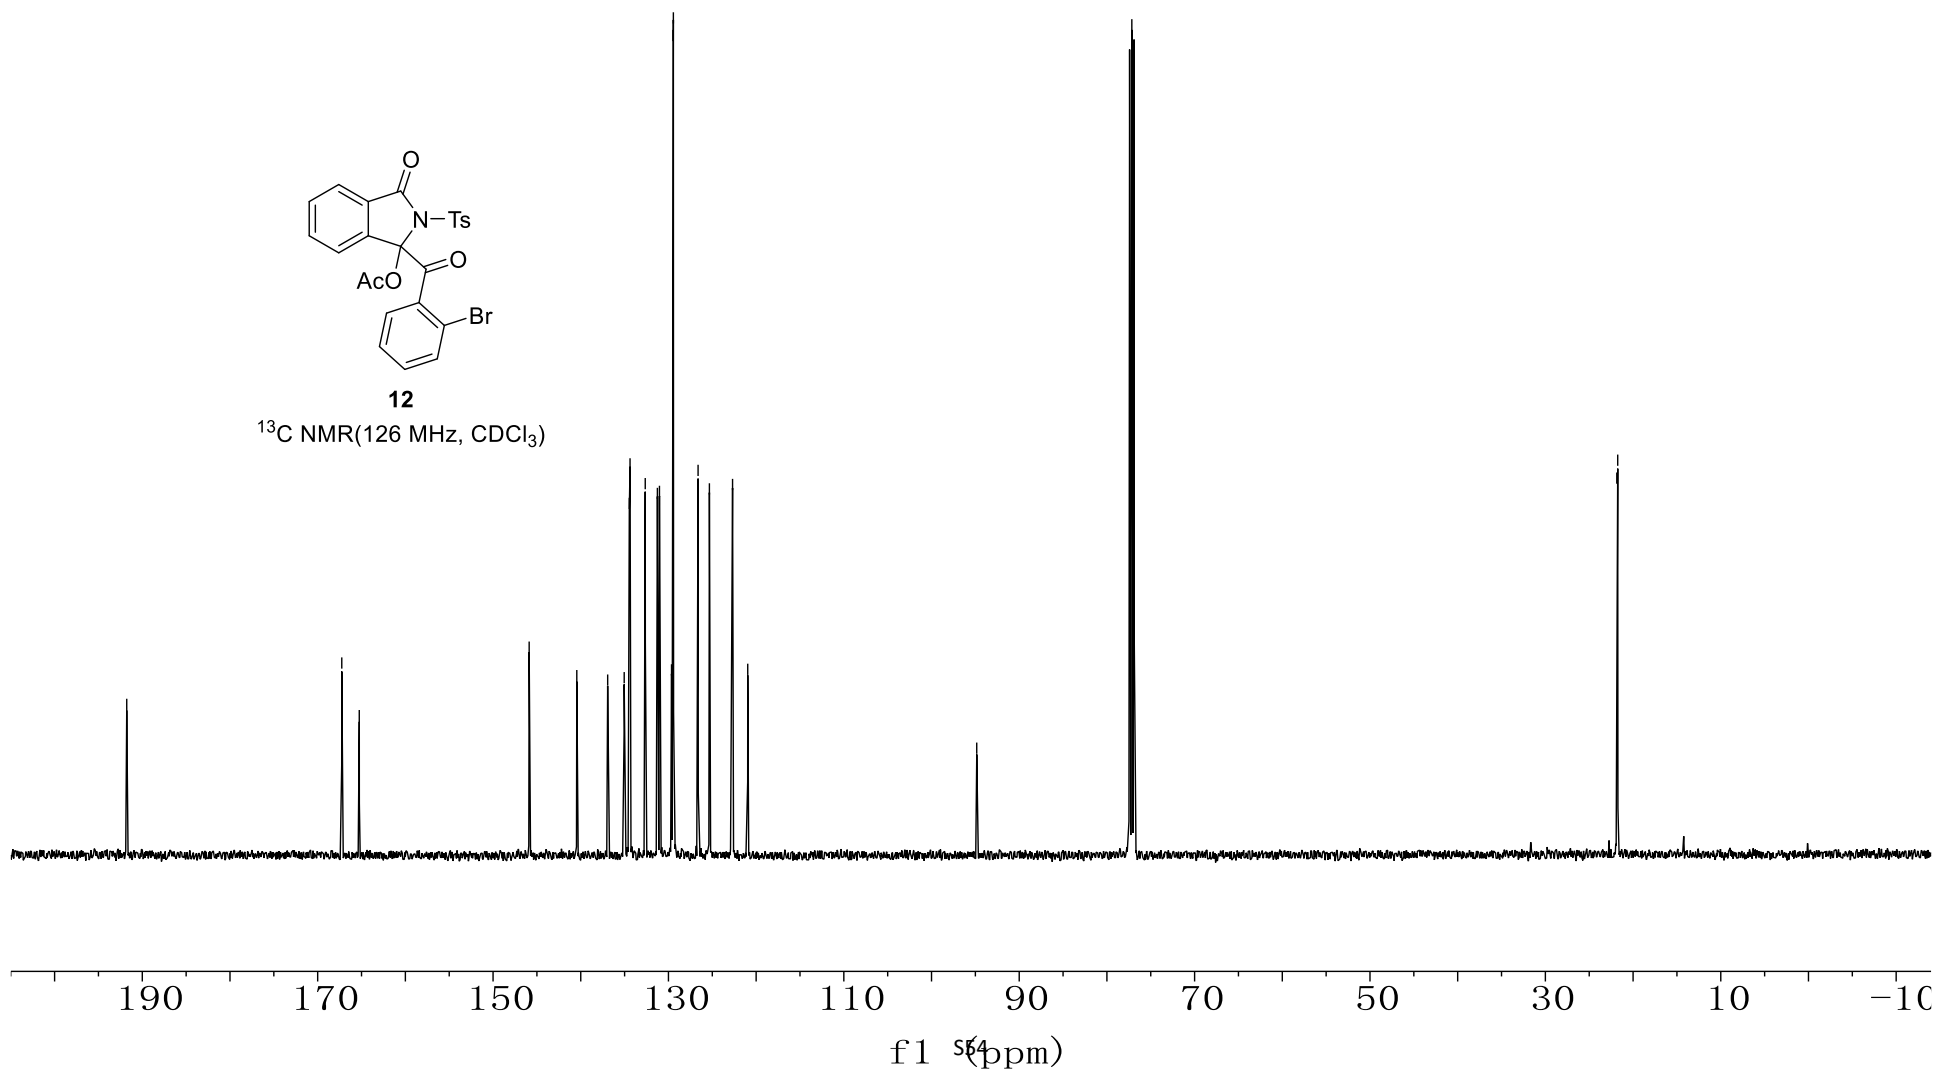

7.92  
7.91  
7.91  
7.91  
7.90  
7.90  
7.90  
7.86  
7.86  
7.86  
7.85  
7.80  
7.80  
7.79  
7.79  
7.78  
7.69  
7.69  
7.68  
7.68  
7.62  
7.61  
7.60  
7.60  
7.59  
7.59  
7.58  
7.57  
7.57  
7.56  
7.56  
7.56  
7.55  
7.54  
7.54  
7.54  
7.44  
7.44  
7.44  
7.43  
7.42  
7.41  
7.41  
7.39  
7.08  
7.07  
7.07  
7.06  
2.12

7.91  
7.91  
7.90  
7.90  
7.90  
7.86  
7.86  
7.86  
7.85  
7.80  
7.80  
7.79  
7.78  
7.69  
7.69  
7.68  
7.68  
7.60  
7.60  
7.59  
7.59  
7.58  
7.57  
7.57  
7.56  
7.56  
7.44  
7.44  
7.44  
7.43  
7.42  
7.41  
7.41  
7.39  
7.08  
7.07  
7.07  
7.06

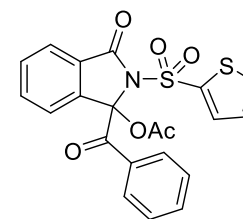

**13**

<sup>1</sup>H NMR(500 MHz, CDCl<sub>3</sub>)

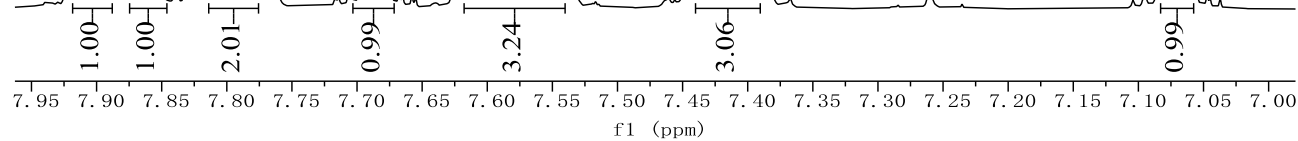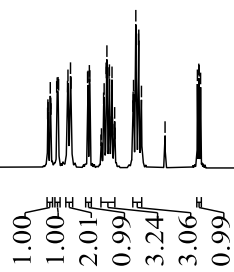

S55

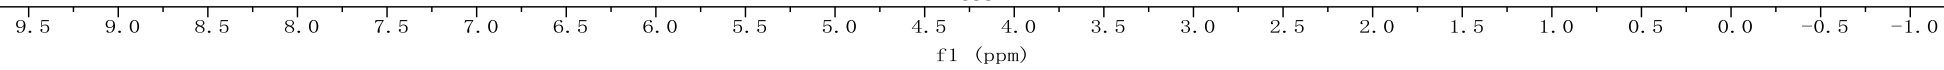

- 190.01

167.78

165.21

140.88

138.18

136.05

135.06

134.94

134.57

133.42

131.43

129.95

129.67

128.68

127.38

125.51

122.84

94.93

77.16

- 21.89

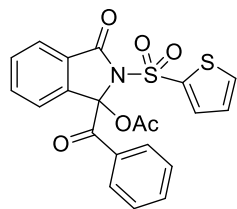

**13**

<sup>13</sup>C NMR (126 MHz, CDCl<sub>3</sub>)

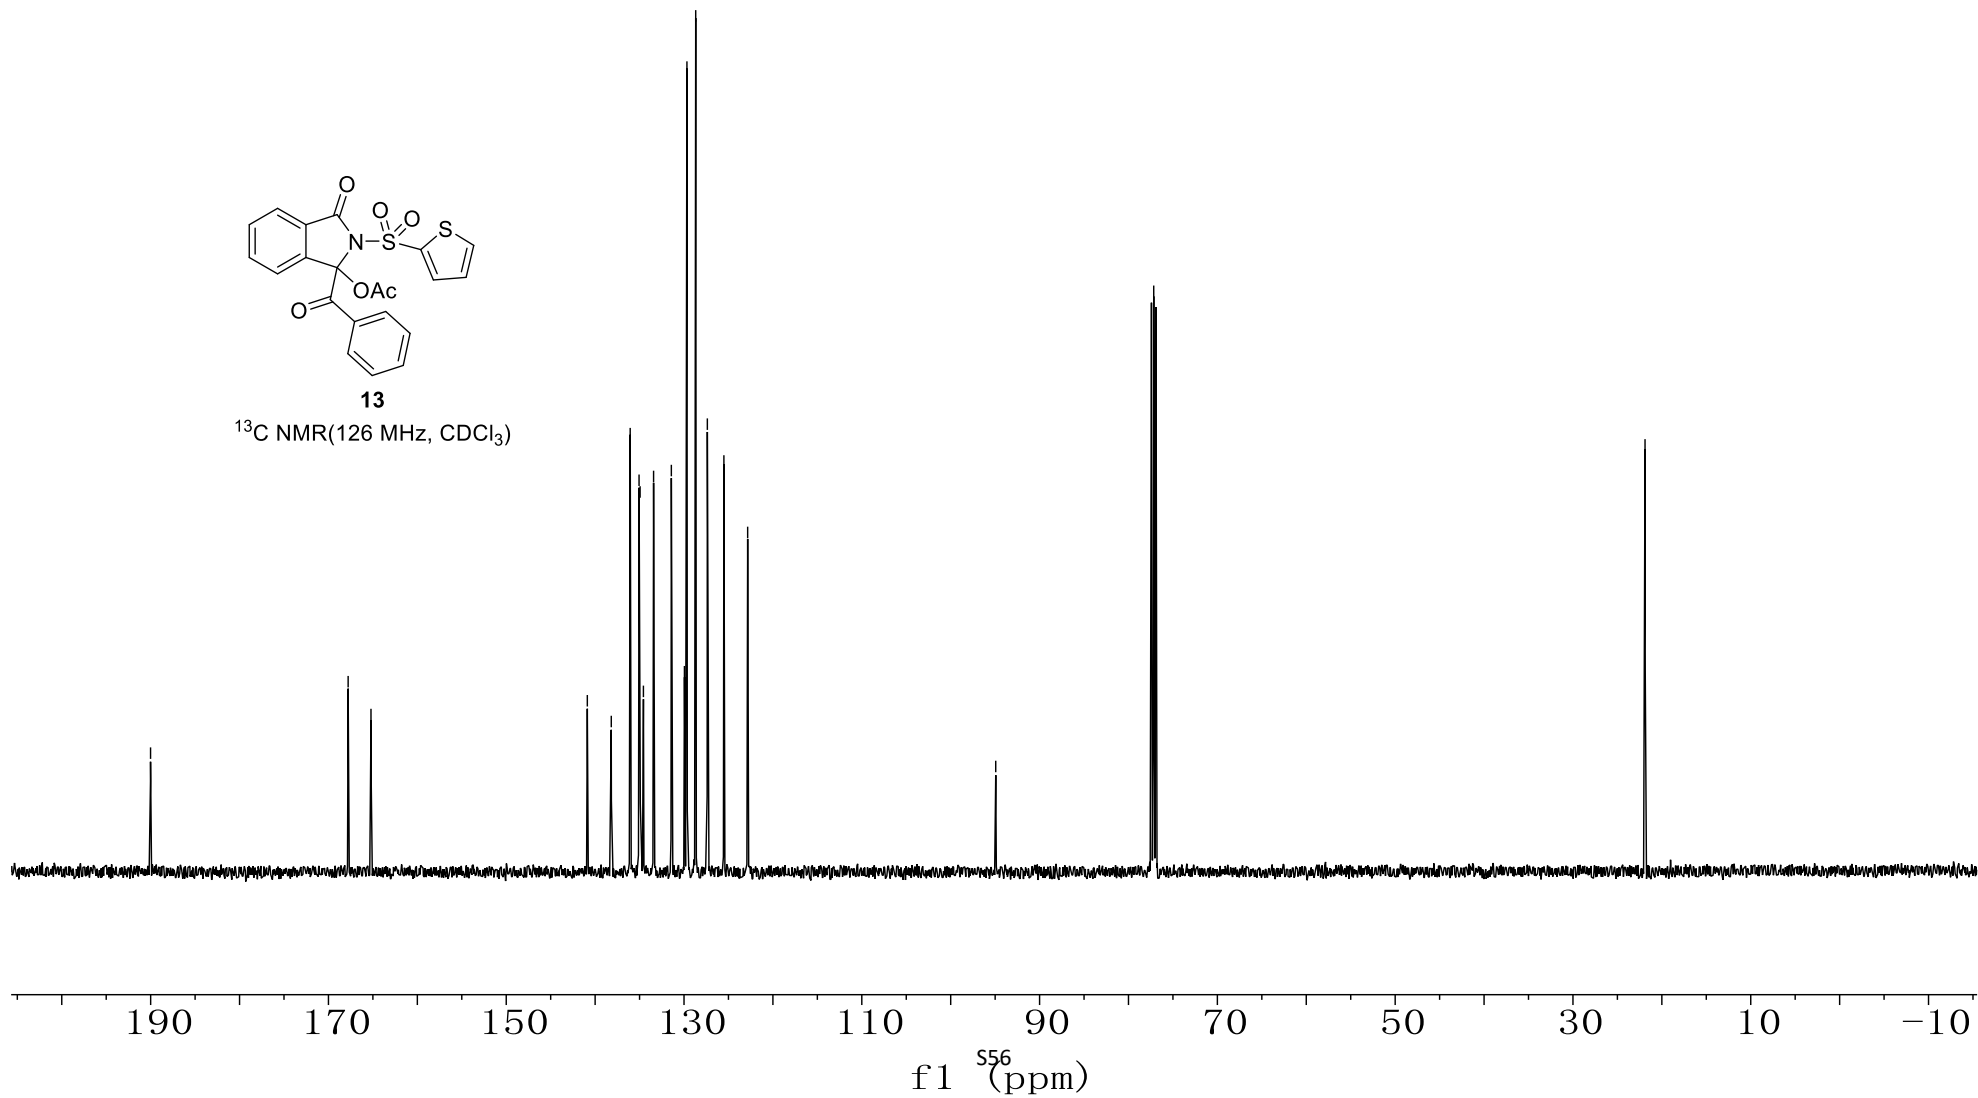





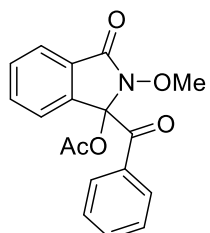

**14**

$^{13}\text{C}$  NMR(126 MHz,  $\text{CDCl}_3$ )

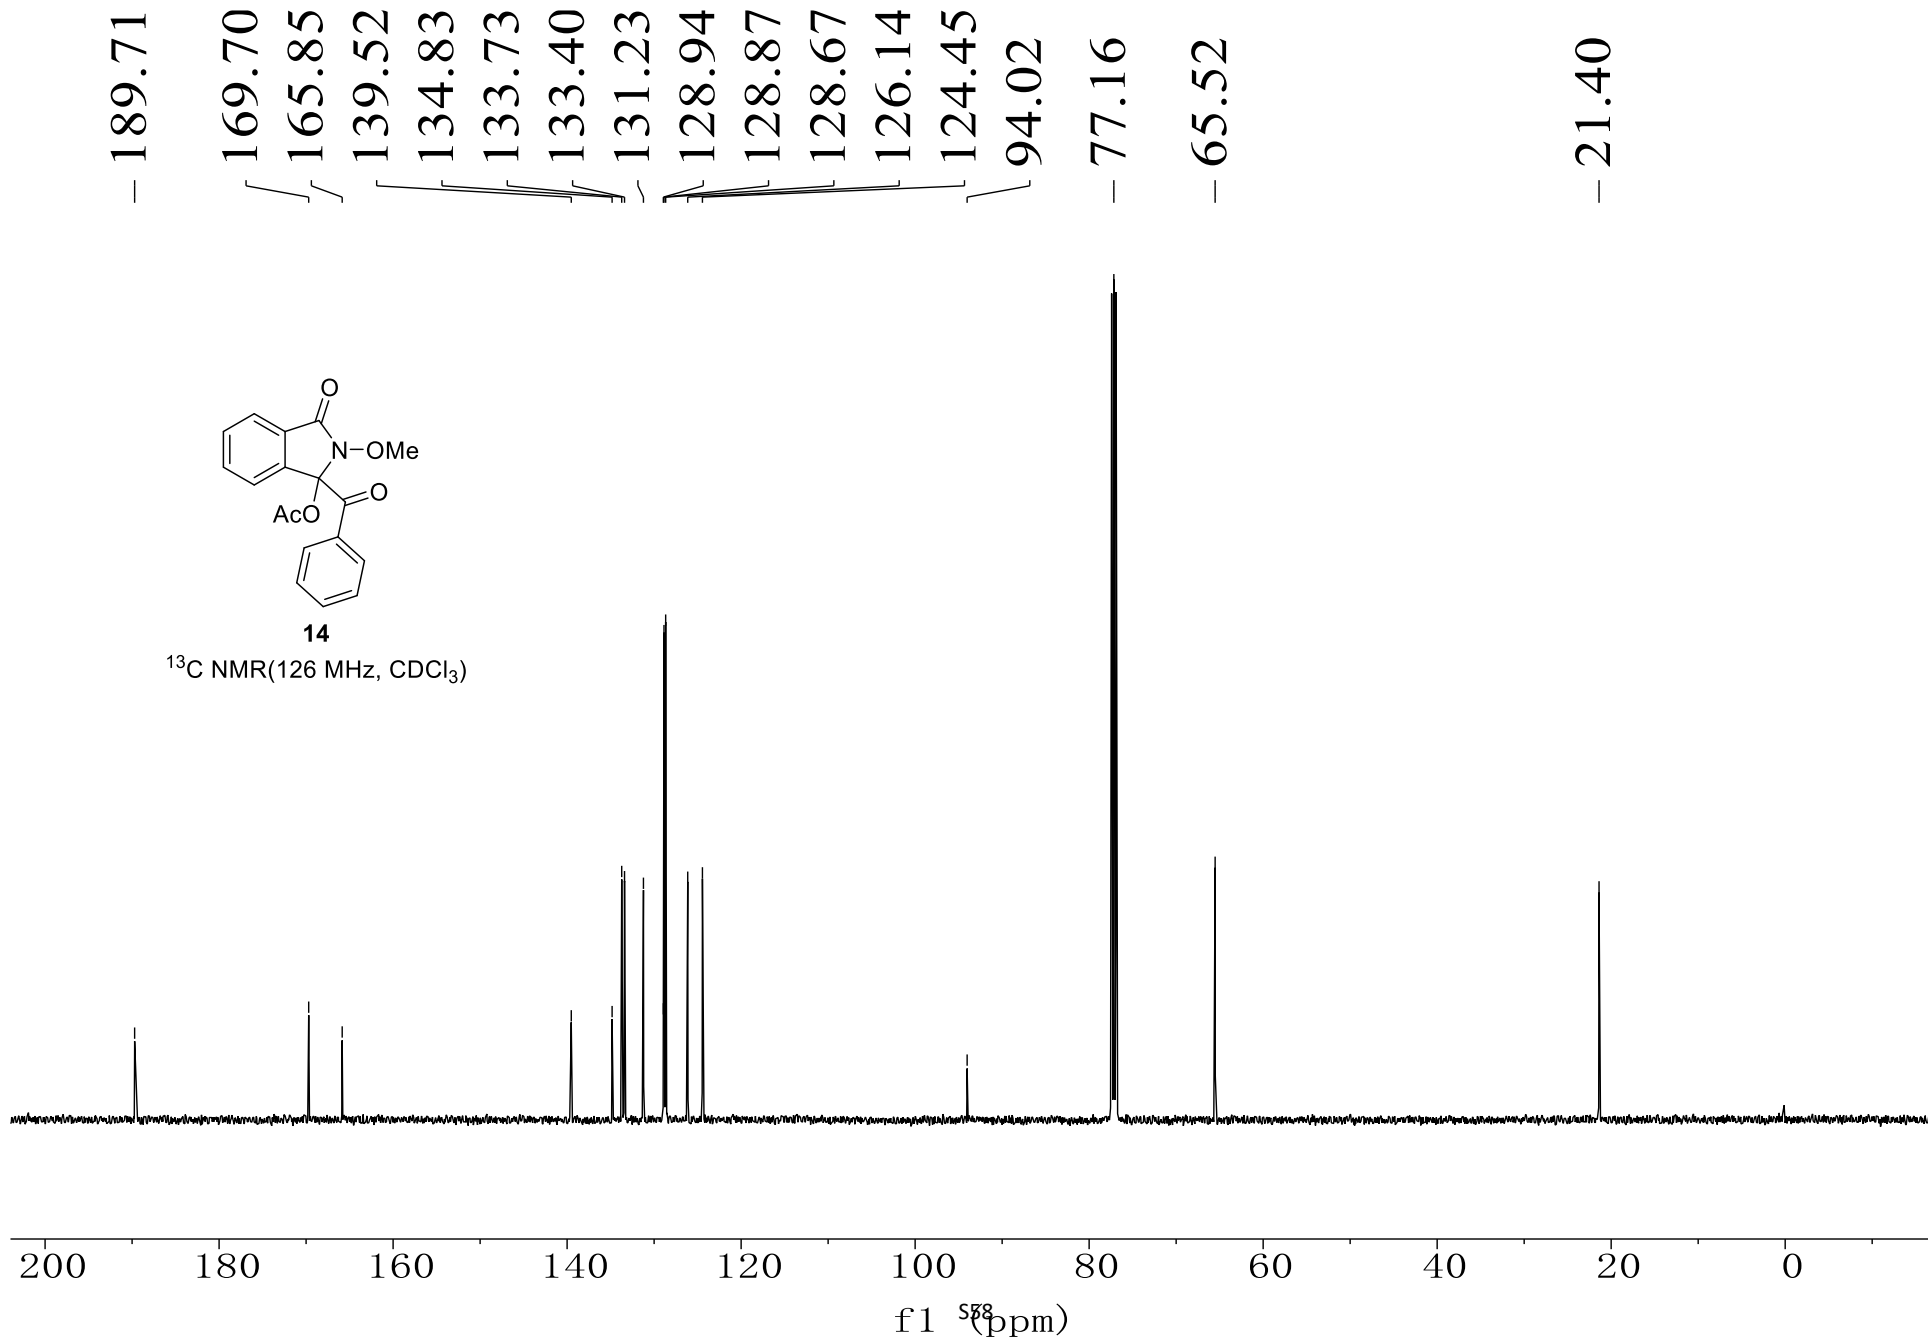

7.83  
7.82  
7.81  
7.81  
7.54  
7.54  
7.53  
7.52  
7.52  
7.52  
7.43  
7.41  
7.41  
7.44  
7.44  
7.43  
7.42  
7.41  
7.41  
7.41  
7.41  
7.40  
7.40  
7.40  
7.39  
7.39  
7.38  
7.38  
7.36  
7.36  
7.36  
7.36  
7.35  
7.35  
7.35  
7.34  
7.34  
7.36  
7.36  
7.36  
7.36  
7.35  
7.35  
7.35  
7.34  
7.34  
7.33  
7.17  
7.17  
7.15  
7.15  
7.35  
7.35  
7.35  
7.34  
7.34  
7.33  
7.17  
7.17  
7.15  
7.15  
3.35  
2.35

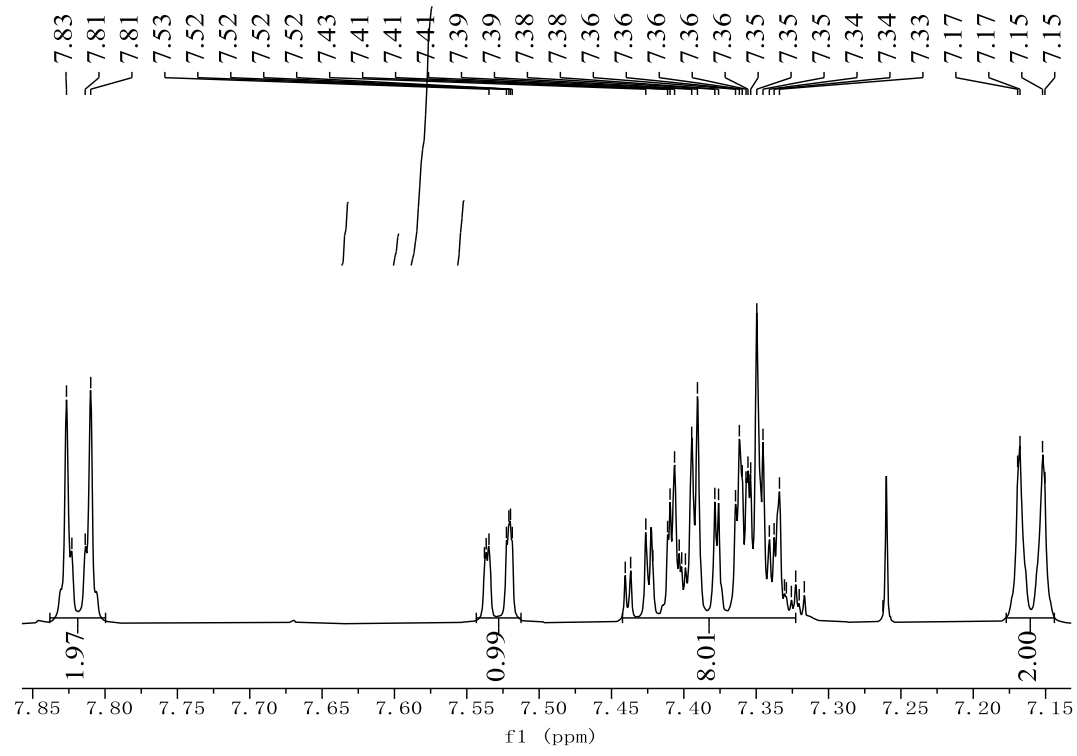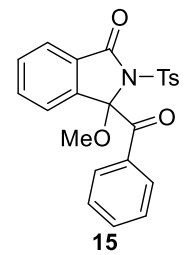

<sup>1</sup>H NMR(500 MHz, CDCl<sub>3</sub>)

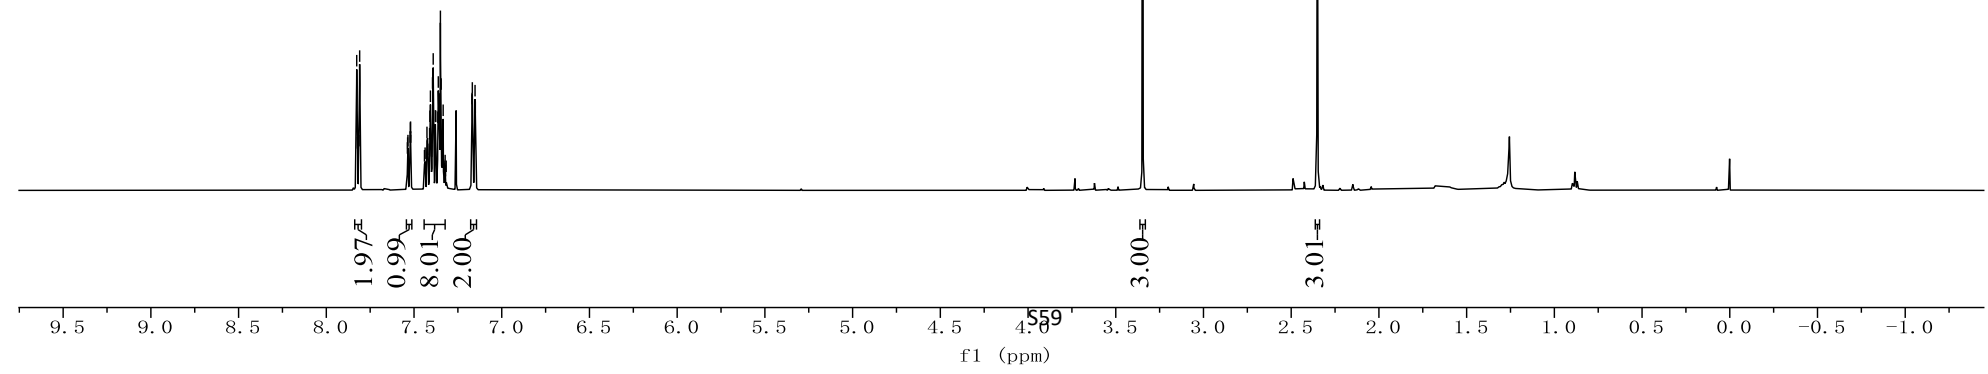

169.77  
144.88  
137.98  
135.58  
132.35  
131.86  
130.14  
129.60  
128.88  
128.52  
128.44  
128.40  
127.26  
122.57  
120.63  
93.77  
85.96  
77.16  
34.32  
21.73

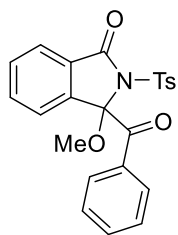

15

<sup>13</sup>C NMR (126 MHz, CDCl<sub>3</sub>)

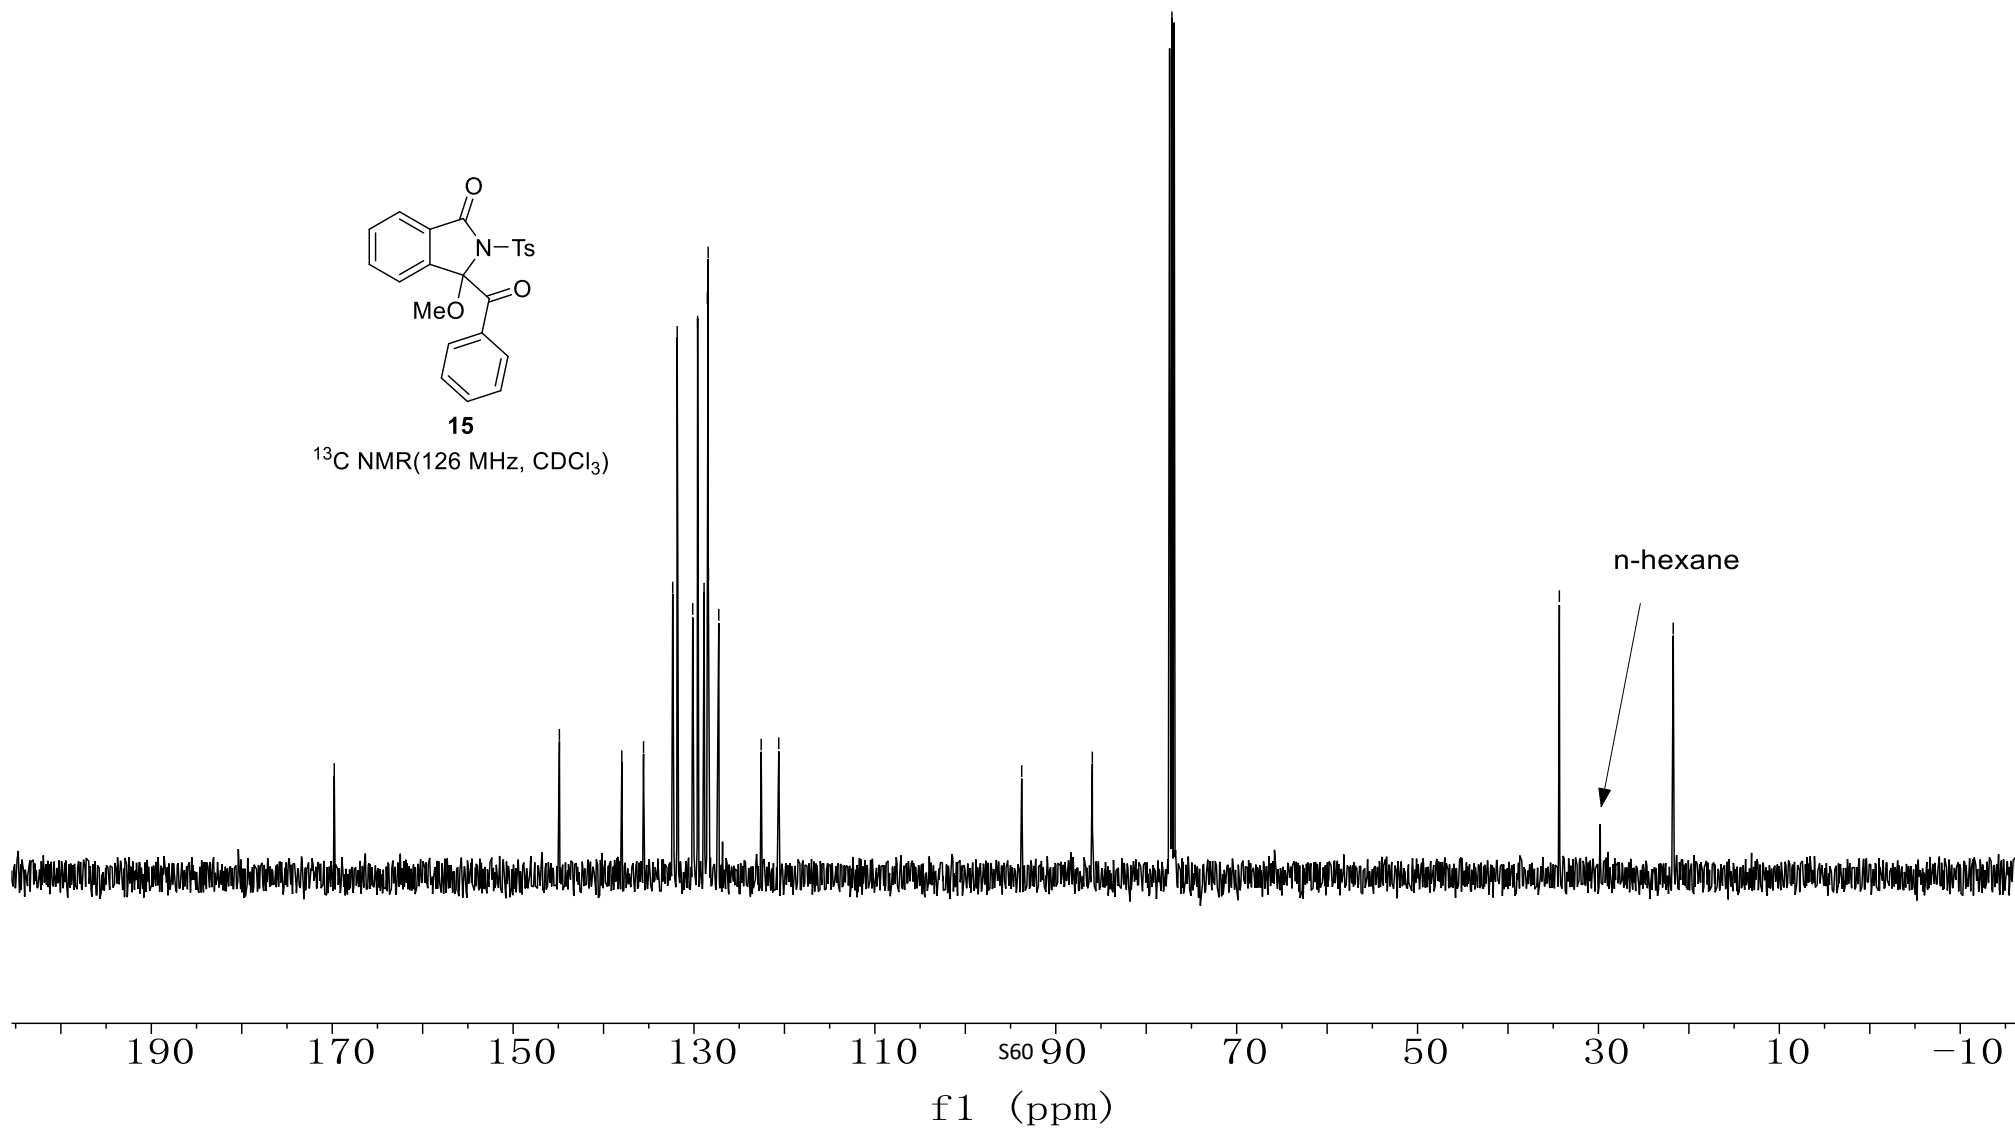

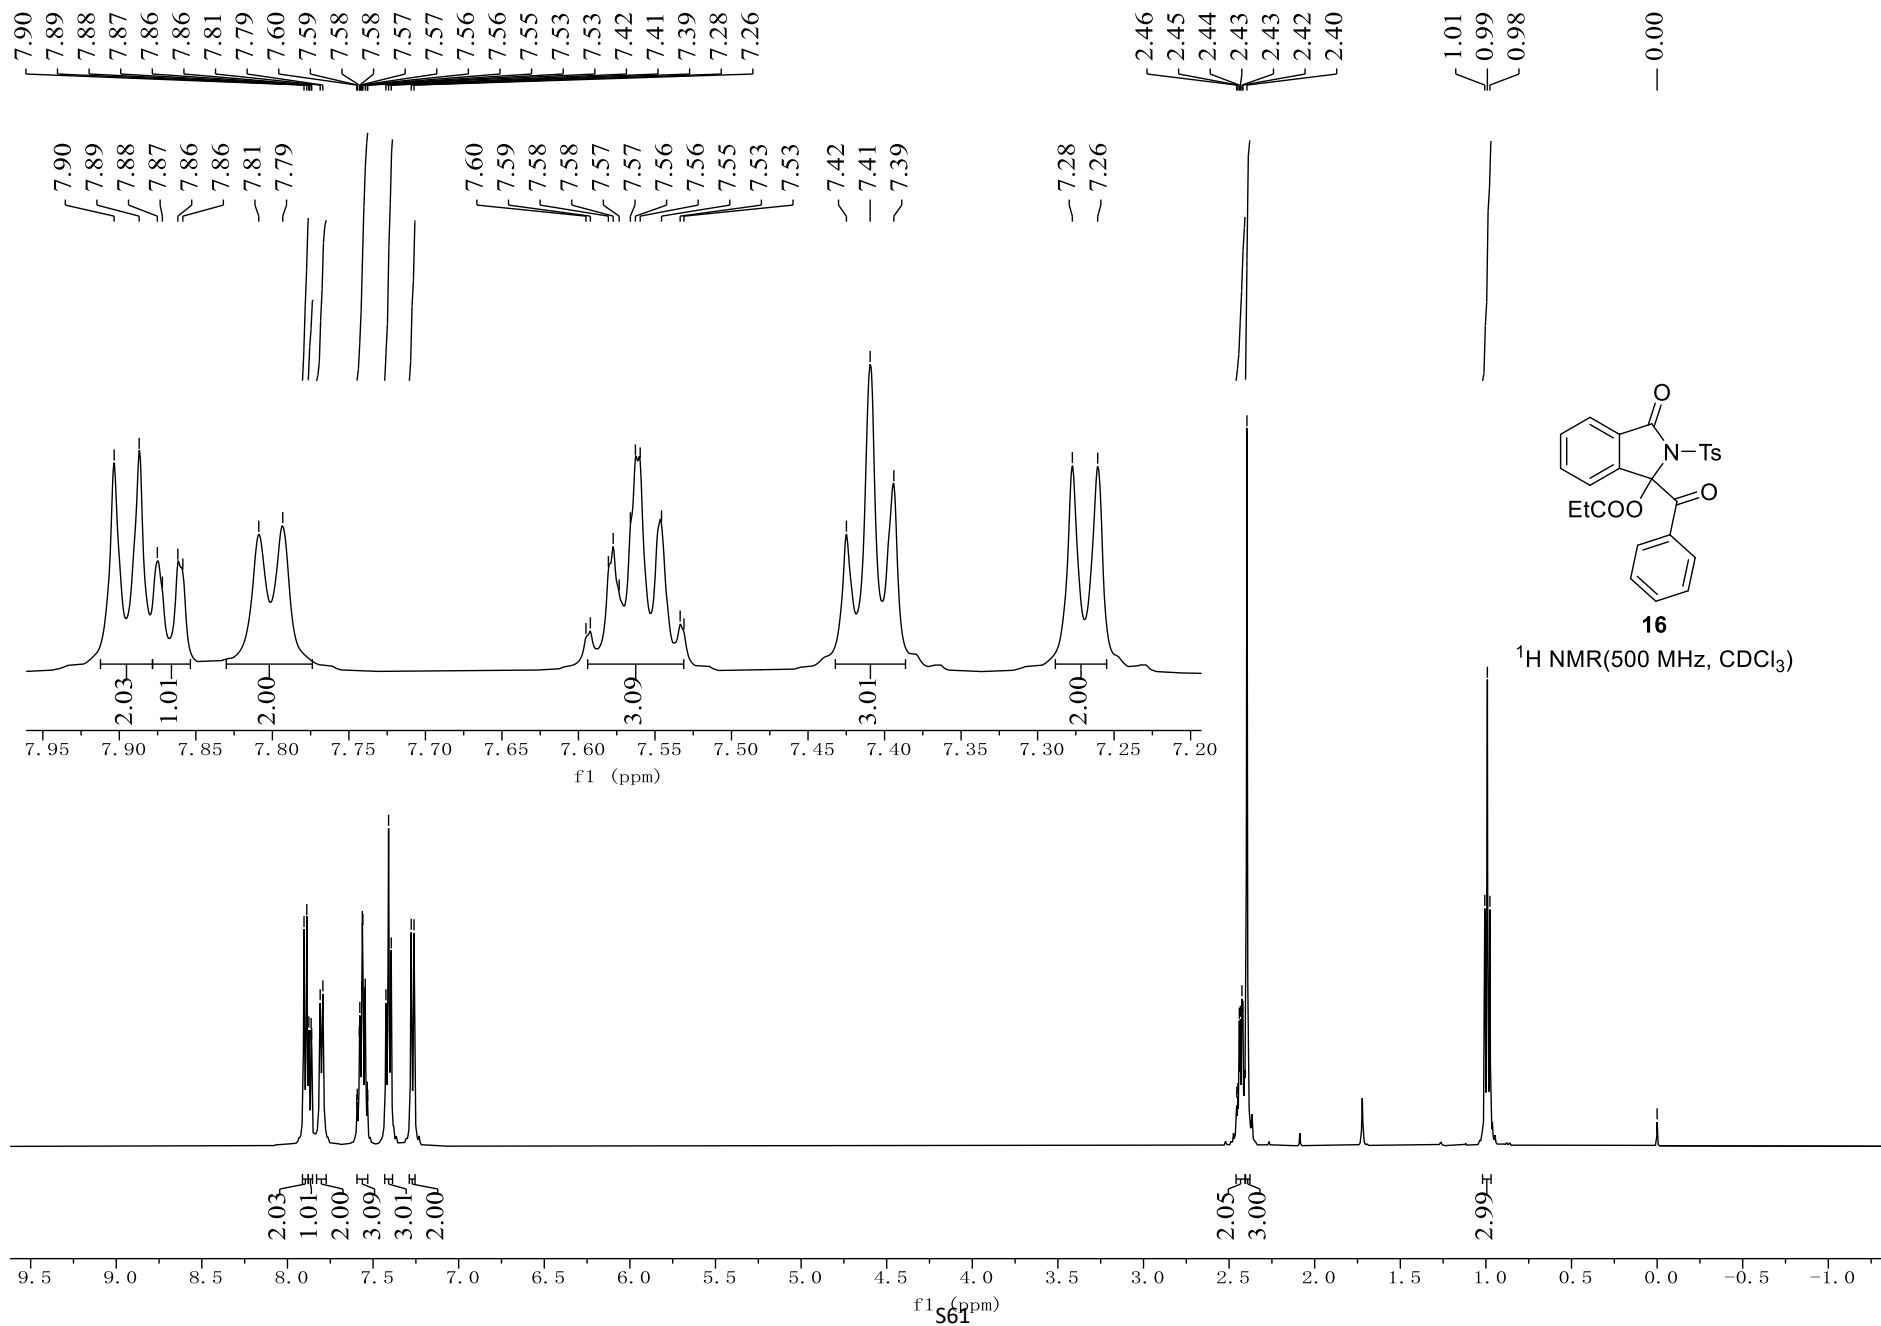

— 190.56

— 171.41

— 165.35

145.68

141.07

135.23

134.83

134.78

133.23

131.30

130.19

129.64

129.40

129.03

128.63

125.39

122.65

94.68

— 77.16

— 28.23

— 21.75

— 8.38

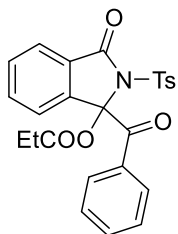

**16**

<sup>13</sup>C NMR (126 MHz, CDCl<sub>3</sub>)

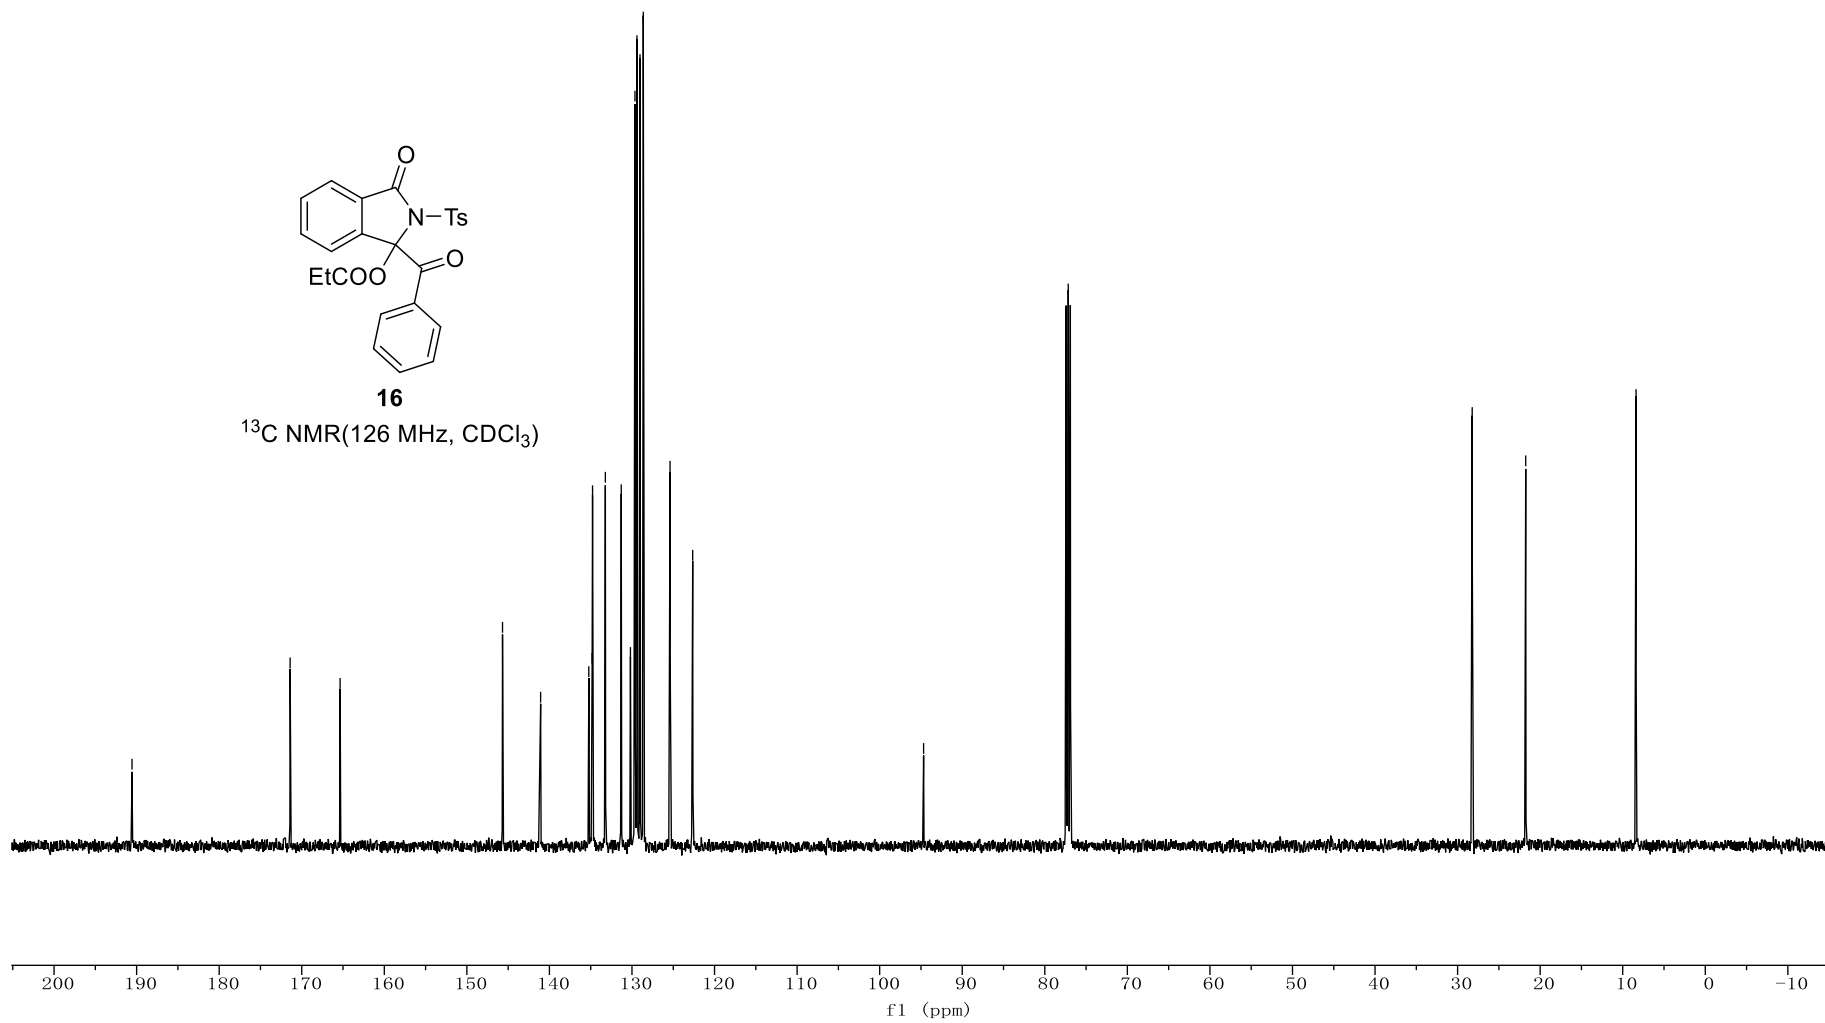

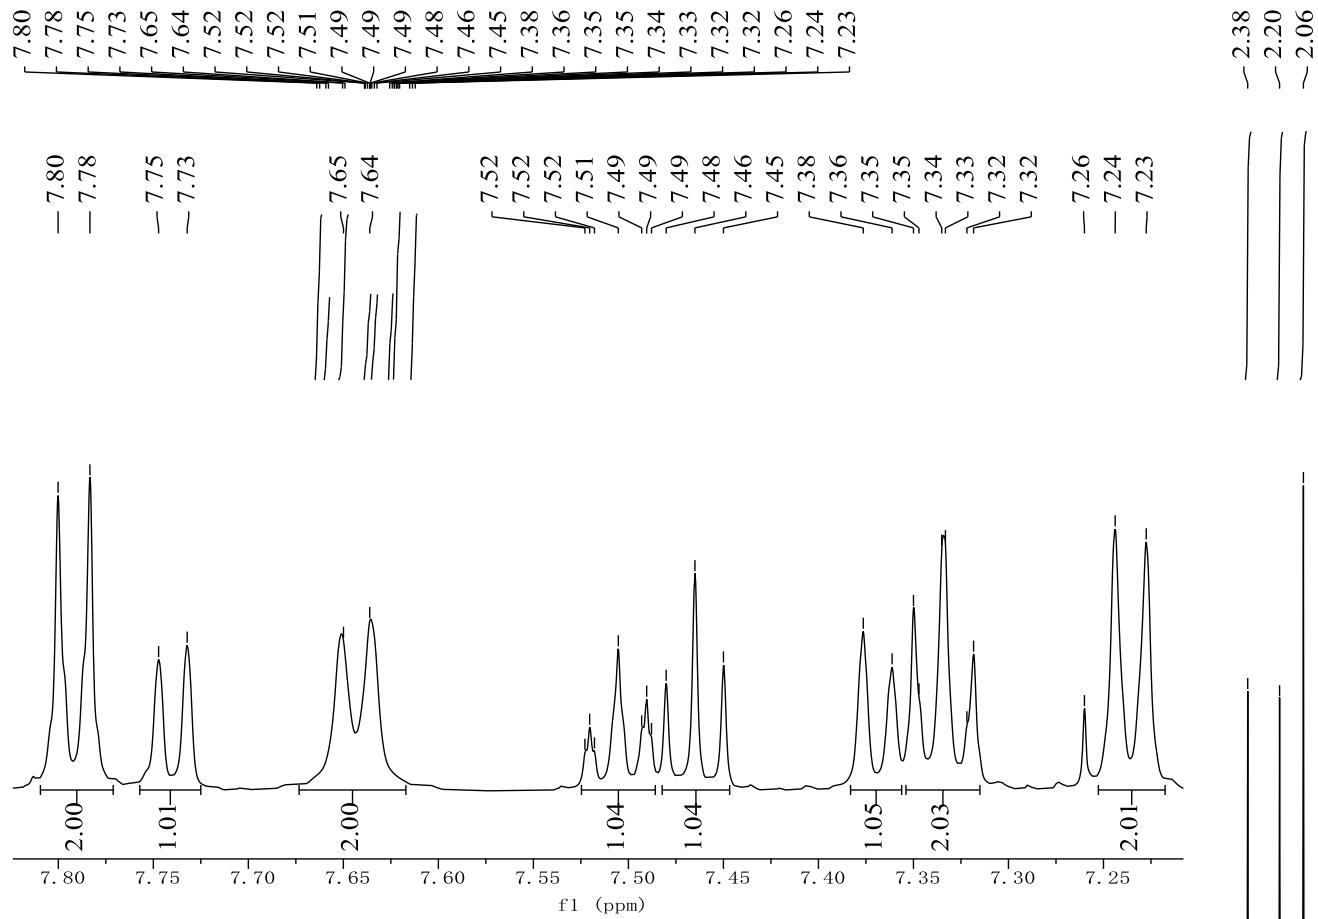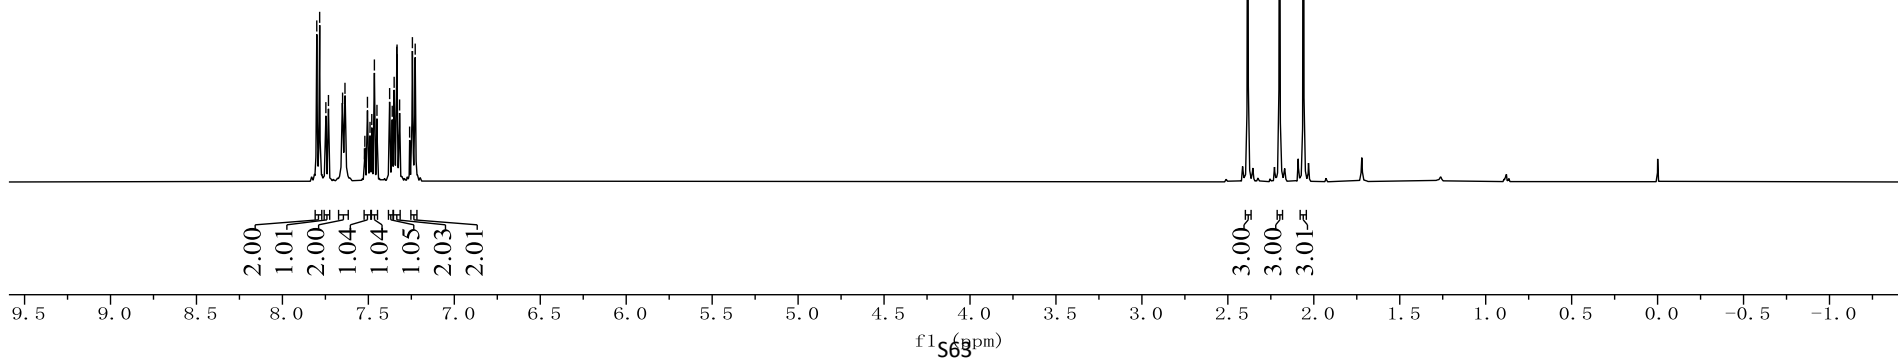

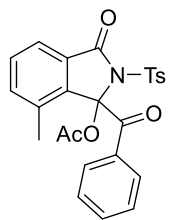

17

$^{13}\text{C}$  NMR (126 MHz,  $\text{CDCl}_3$ )

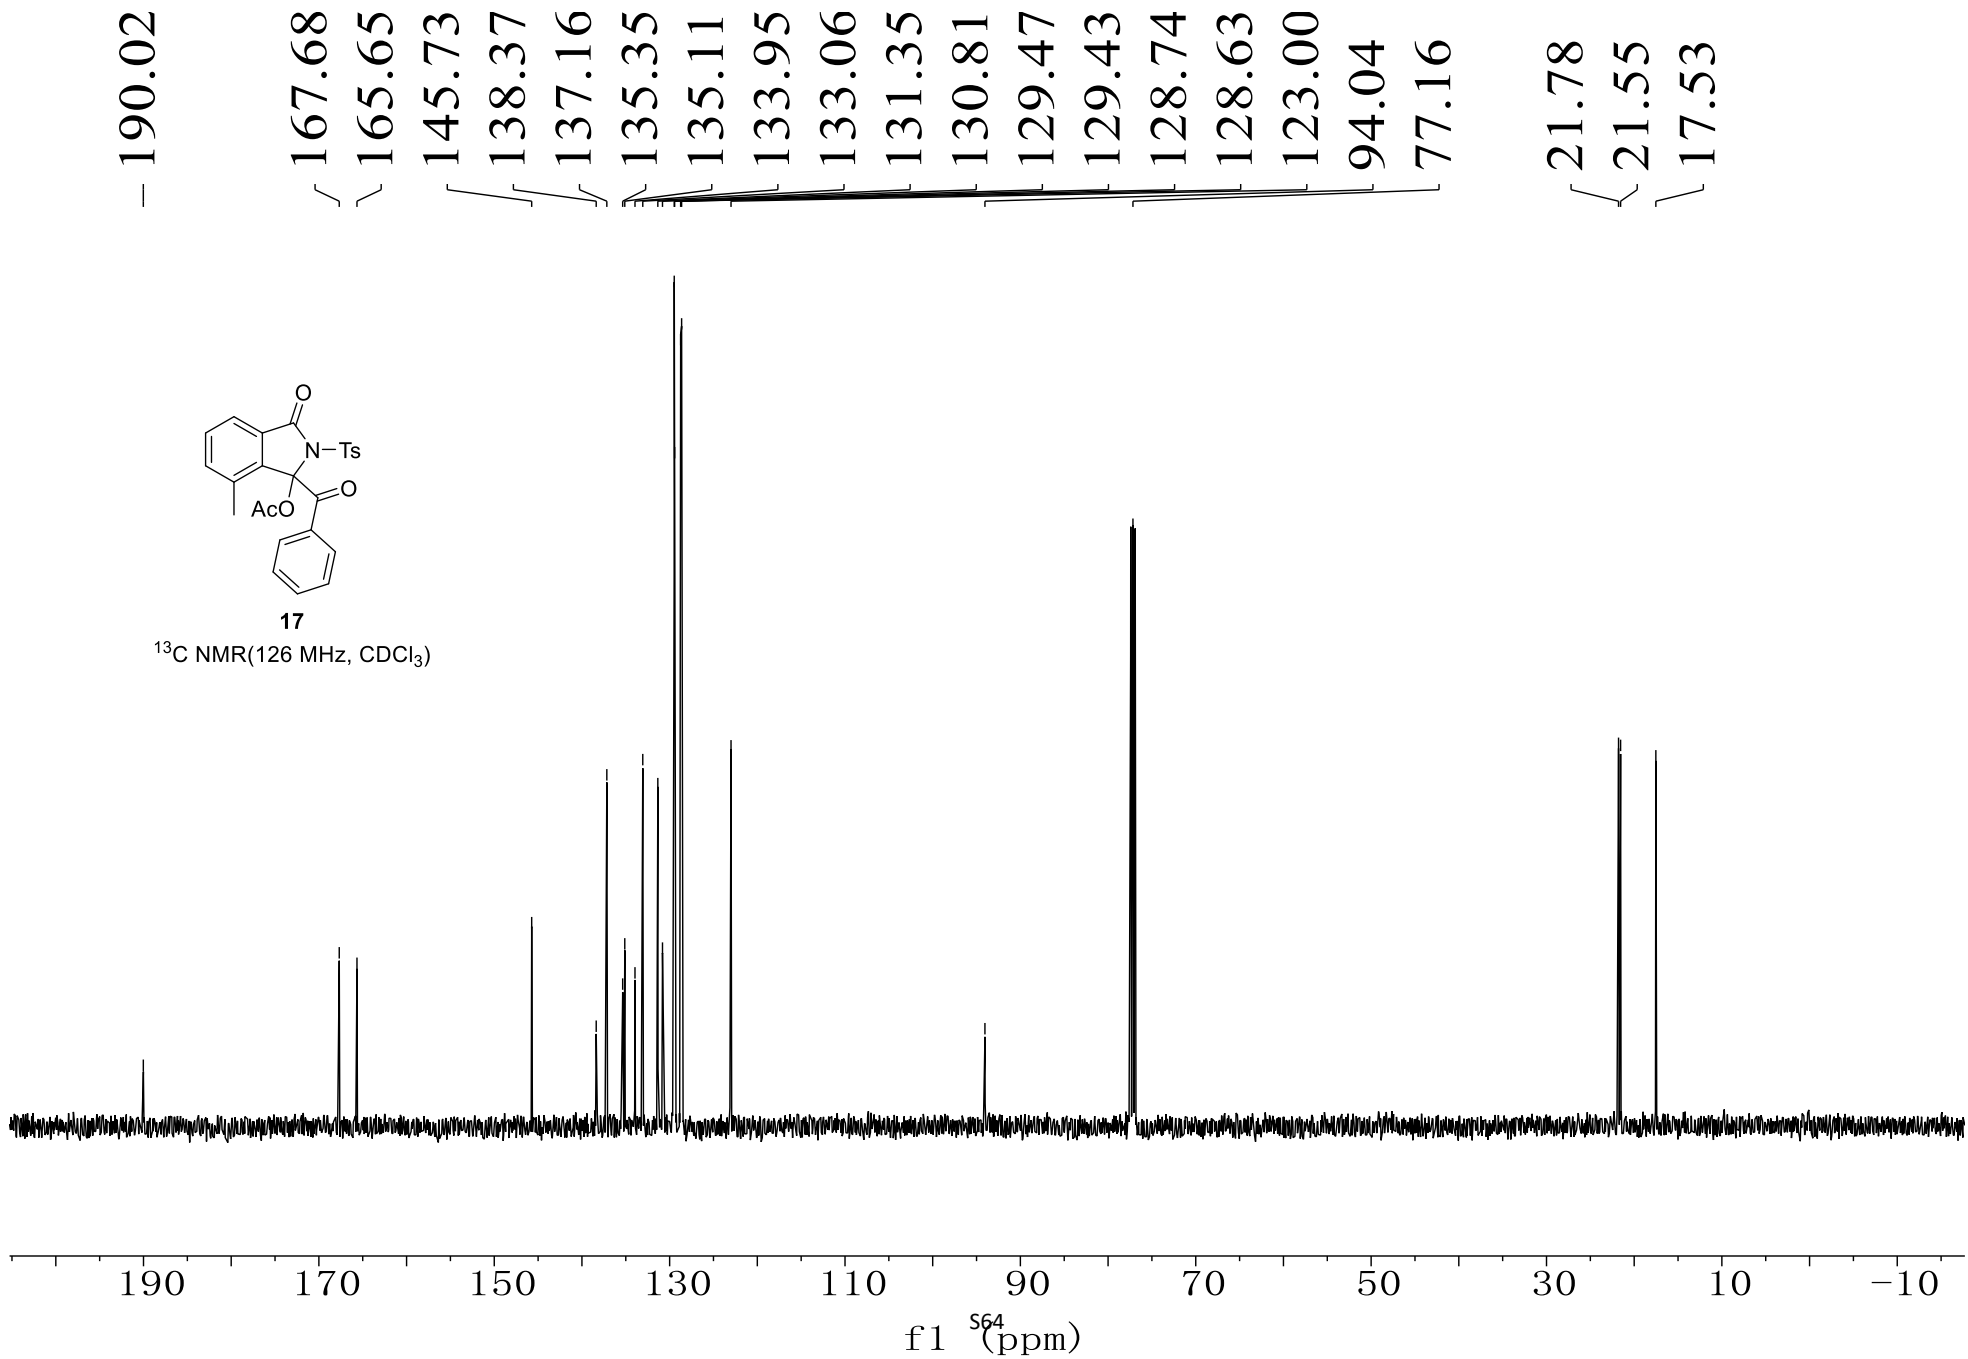



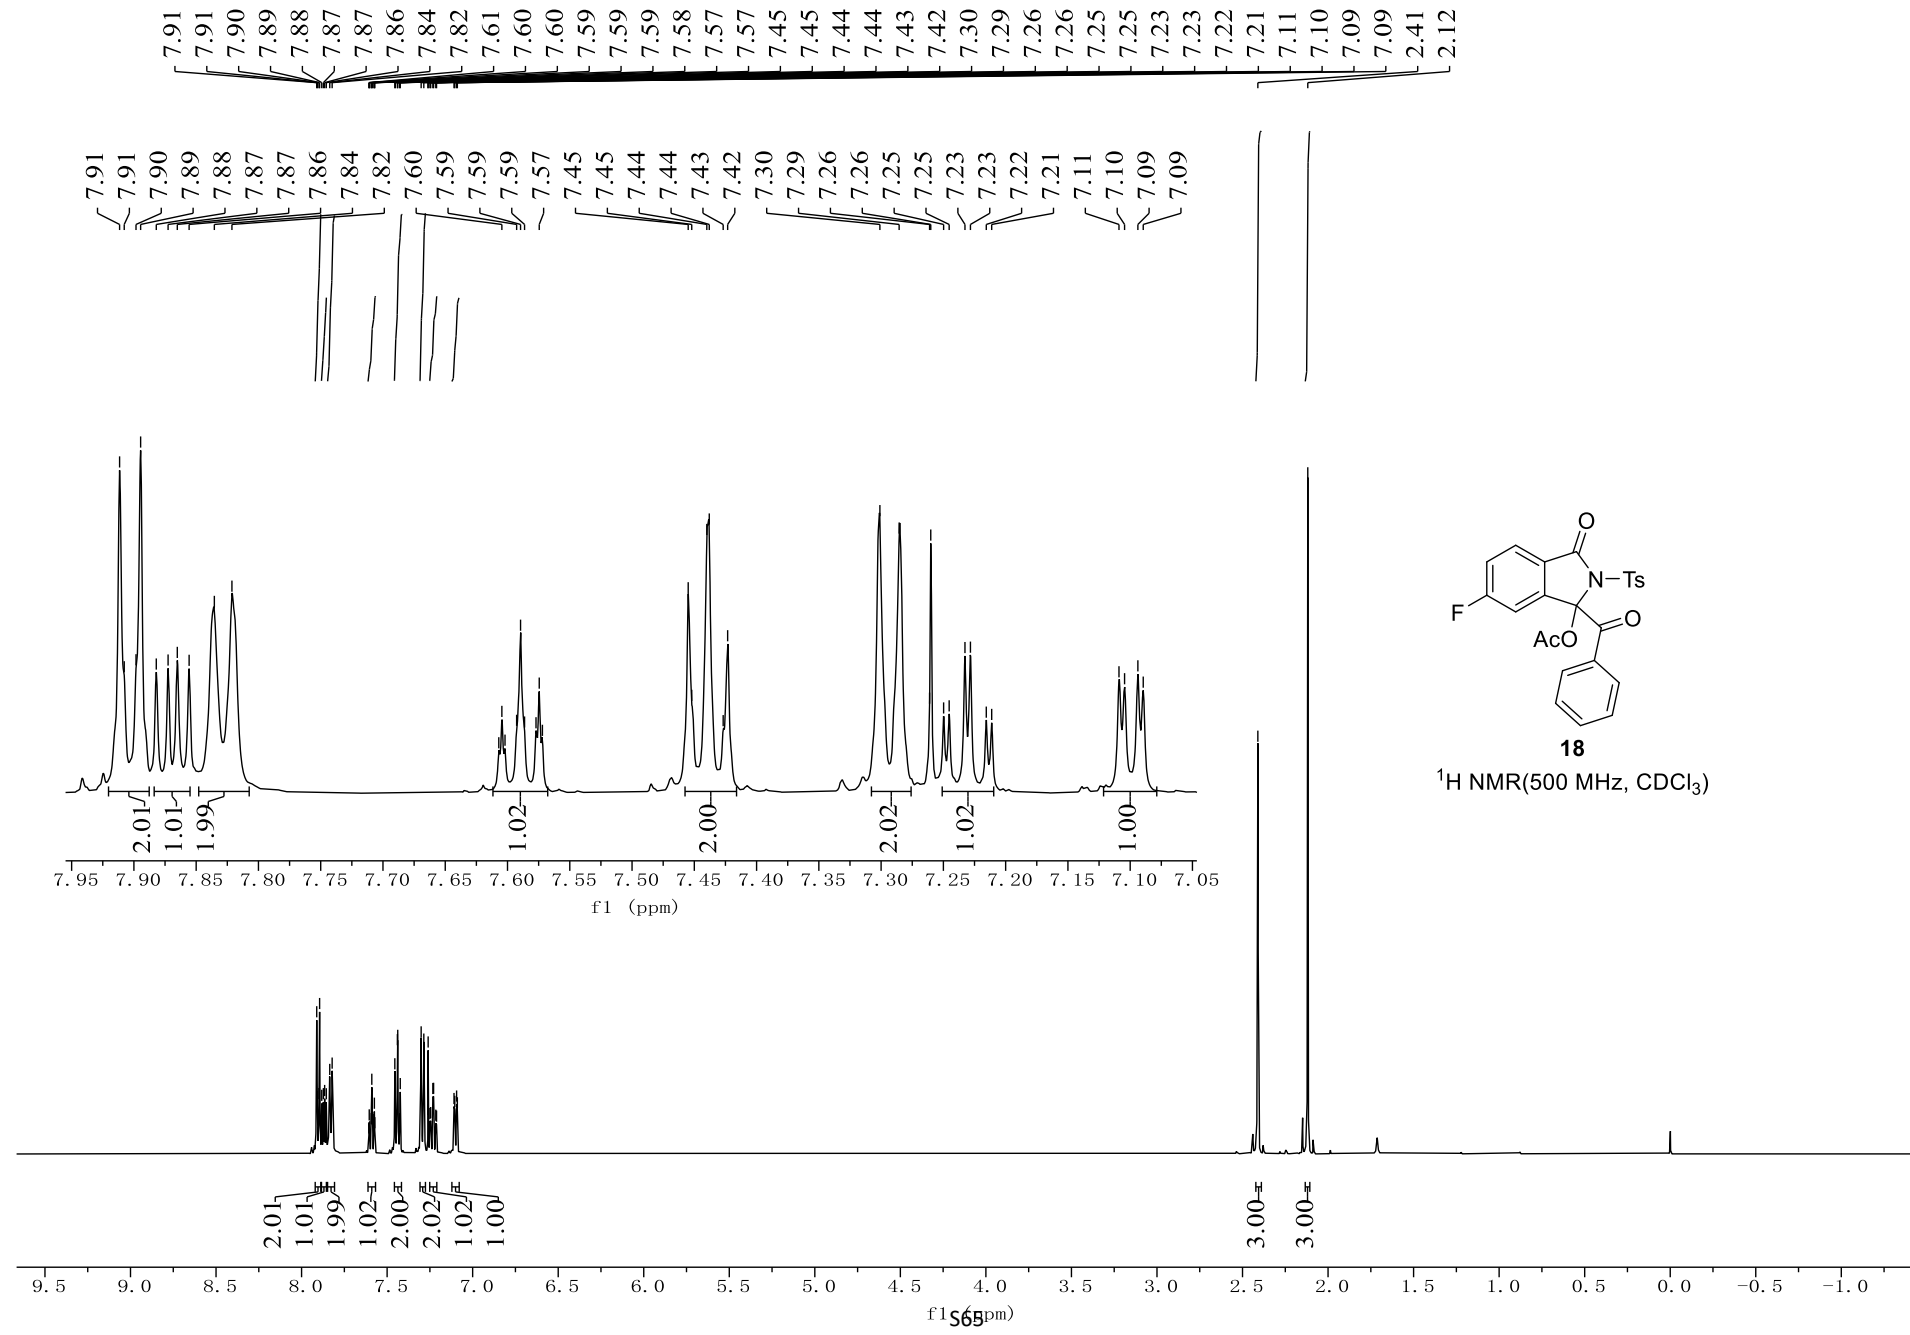

189.92  
167.76  
167.53  
165.48  
164.20  
145.91  
143.63  
143.55  
135.07  
134.51  
133.54  
129.68  
129.47  
129.08  
128.78  
127.85  
127.77  
126.17  
126.15  
119.15  
118.96  
110.86  
110.66  
93.95  
77.16  
21.80

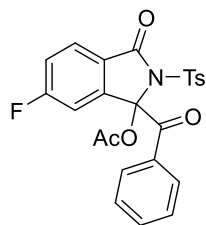

**18**  
<sup>13</sup>C NMR (126 MHz, CDCl<sub>3</sub>)

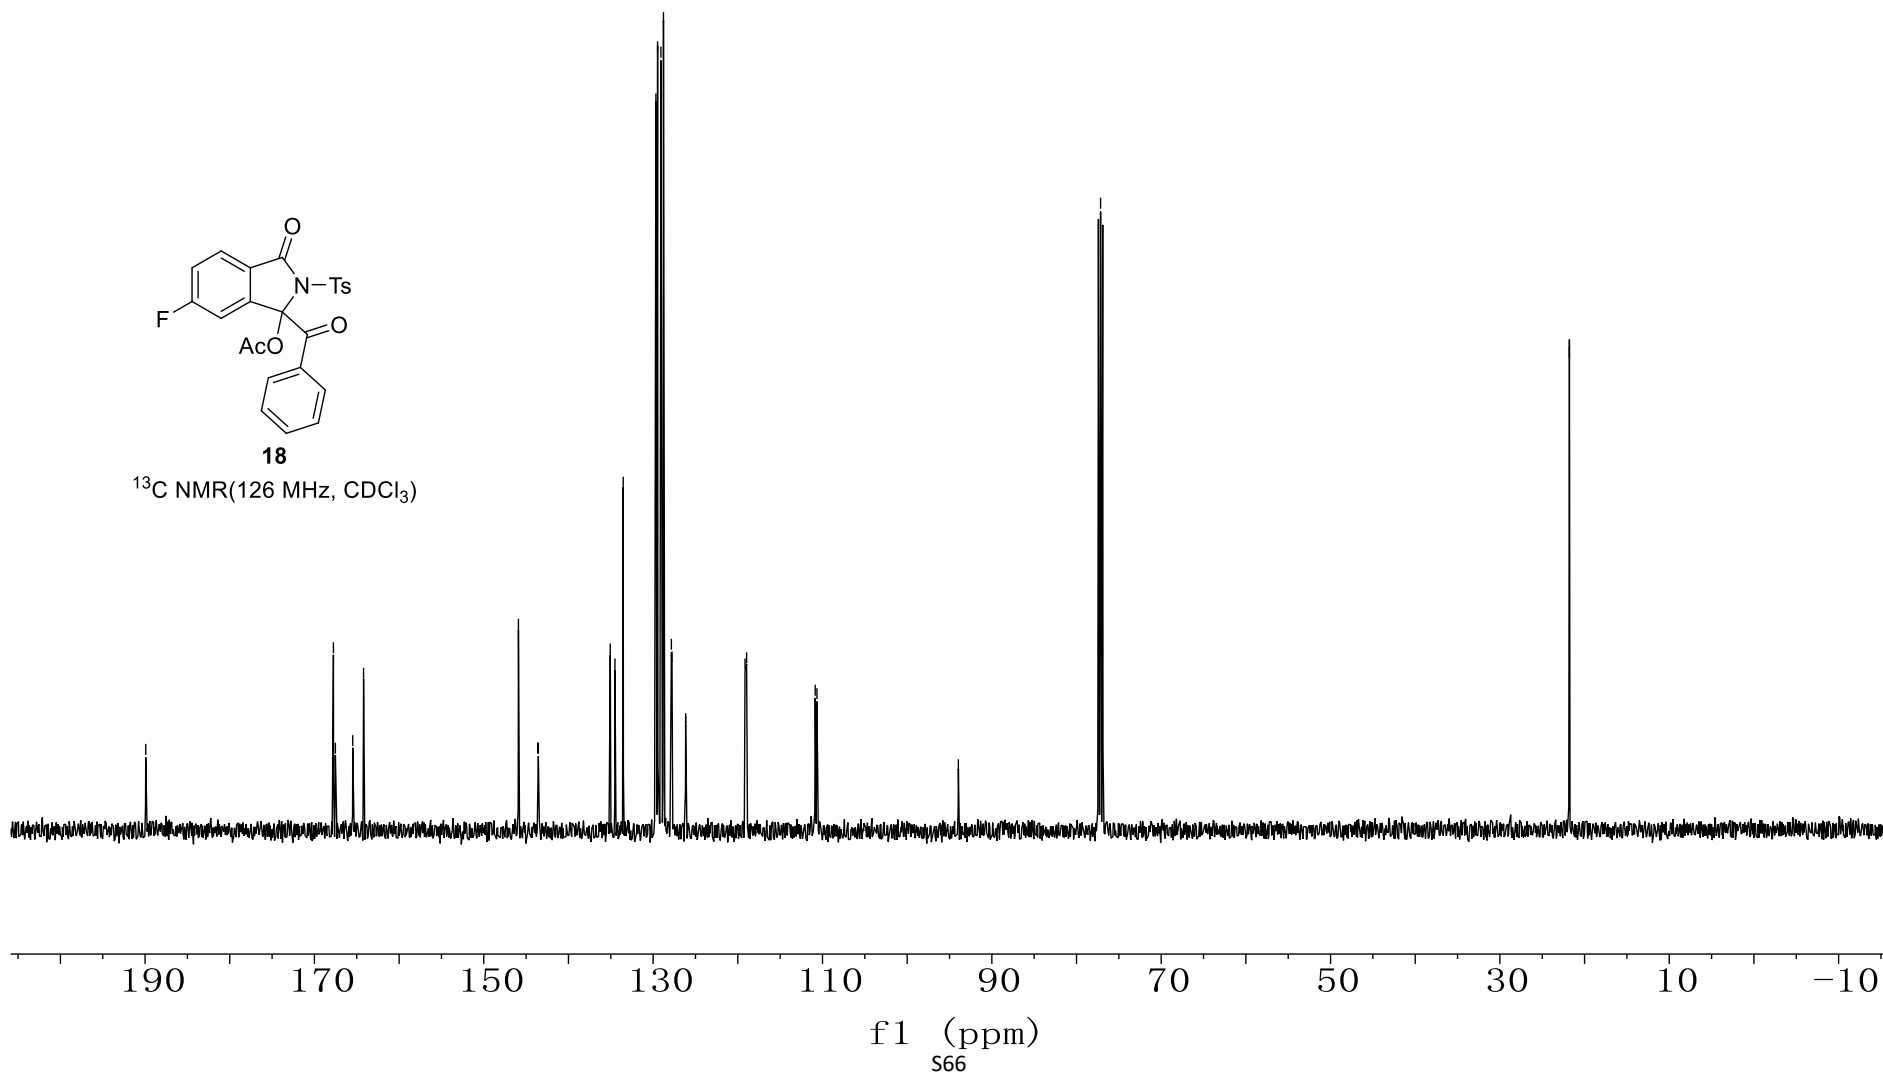

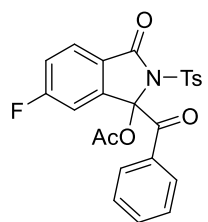

**18**

$^{19}\text{F}$  NMR(471 MHz,  $\text{CDCl}_3$ )

-100.09

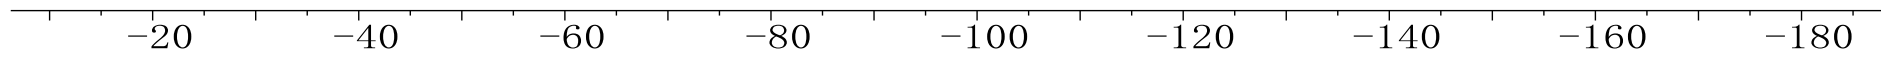

f1 (ppm)  
s67

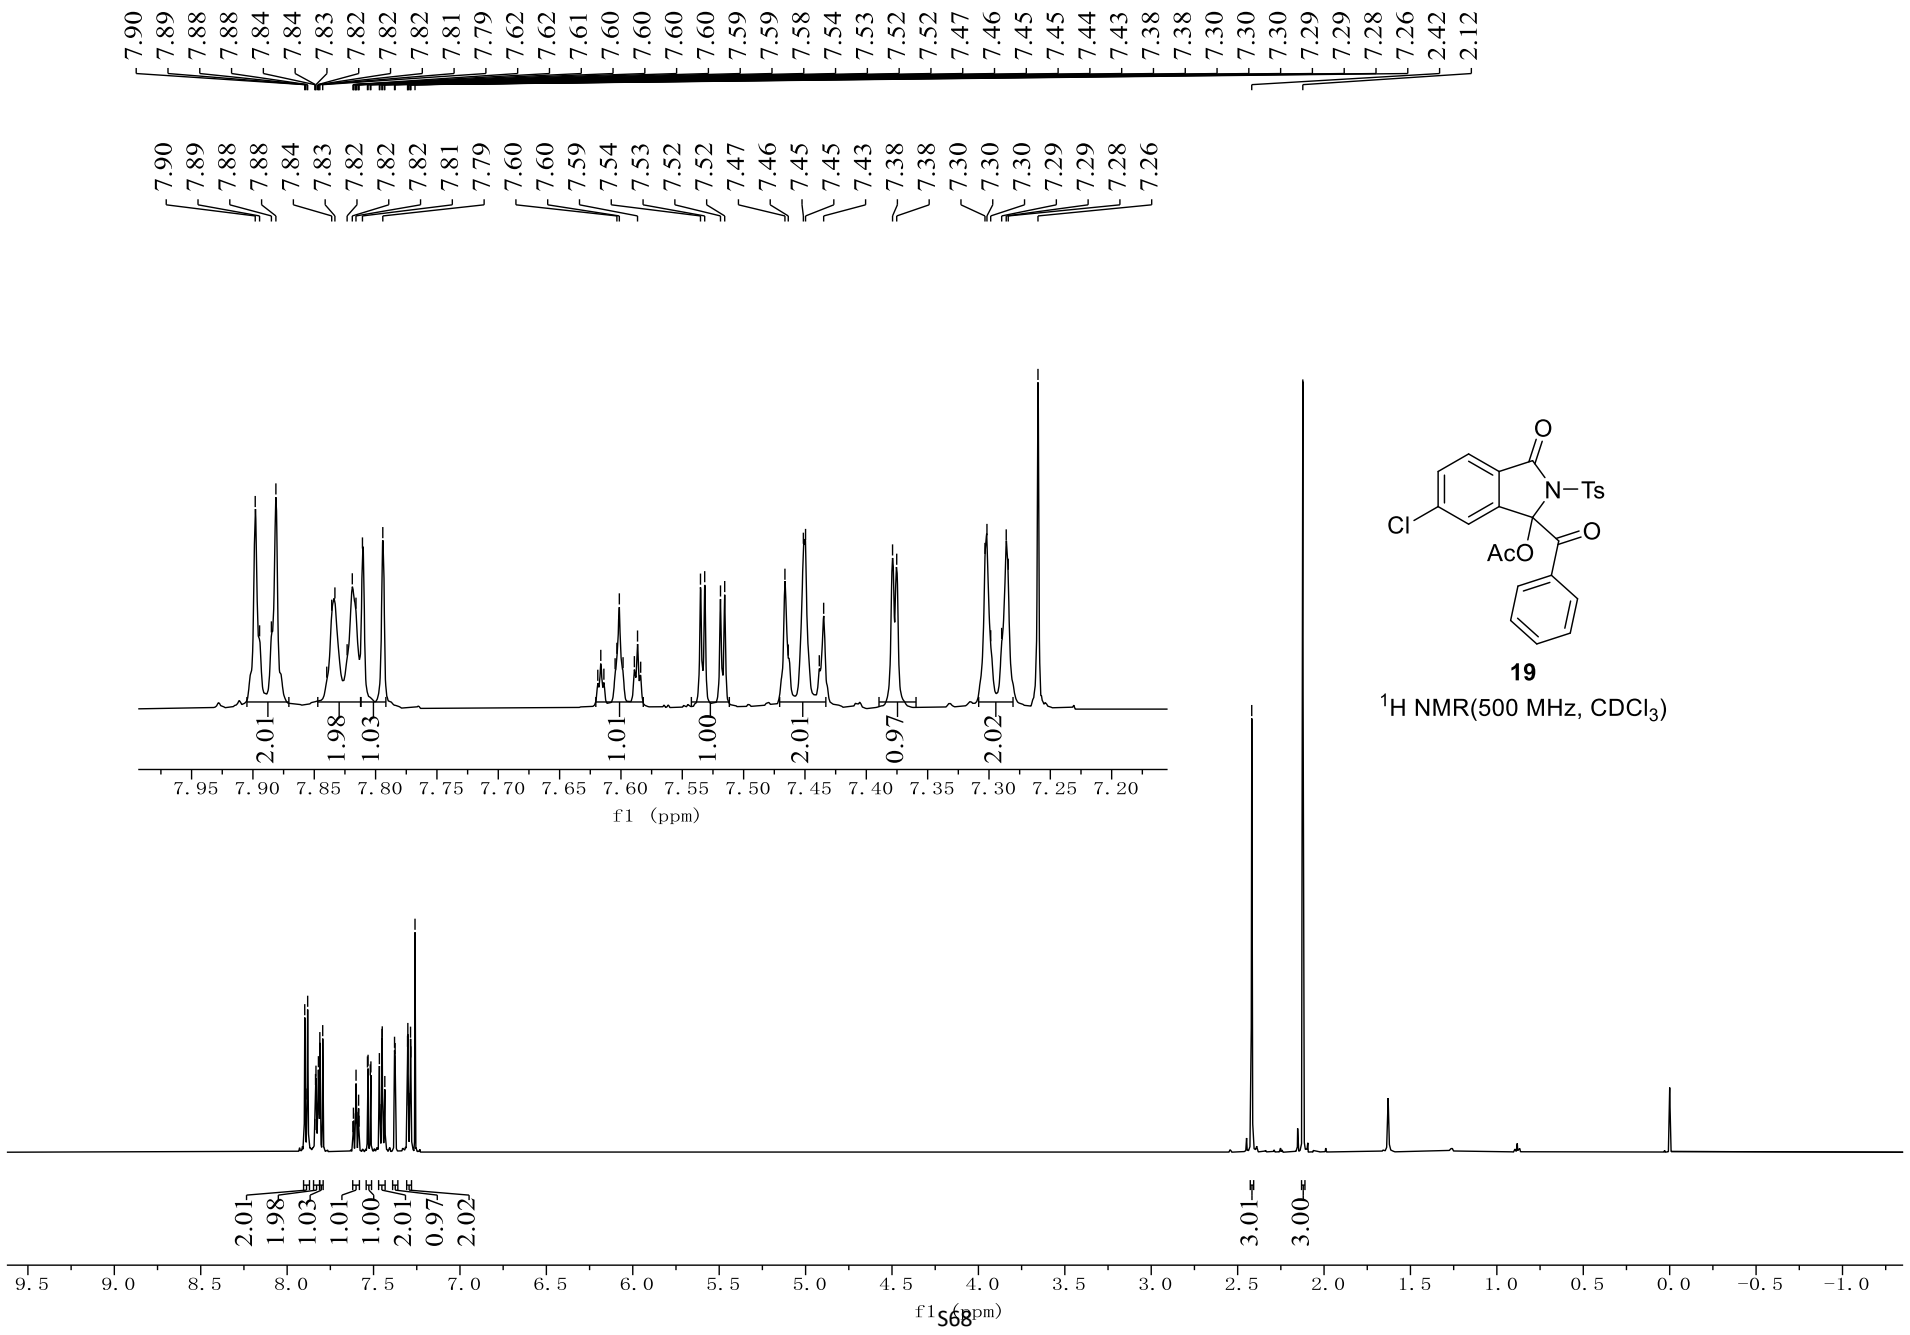

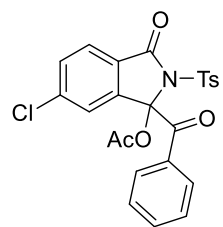

**19**

<sup>13</sup>C NMR(126 MHz, CDCl<sub>3</sub>)

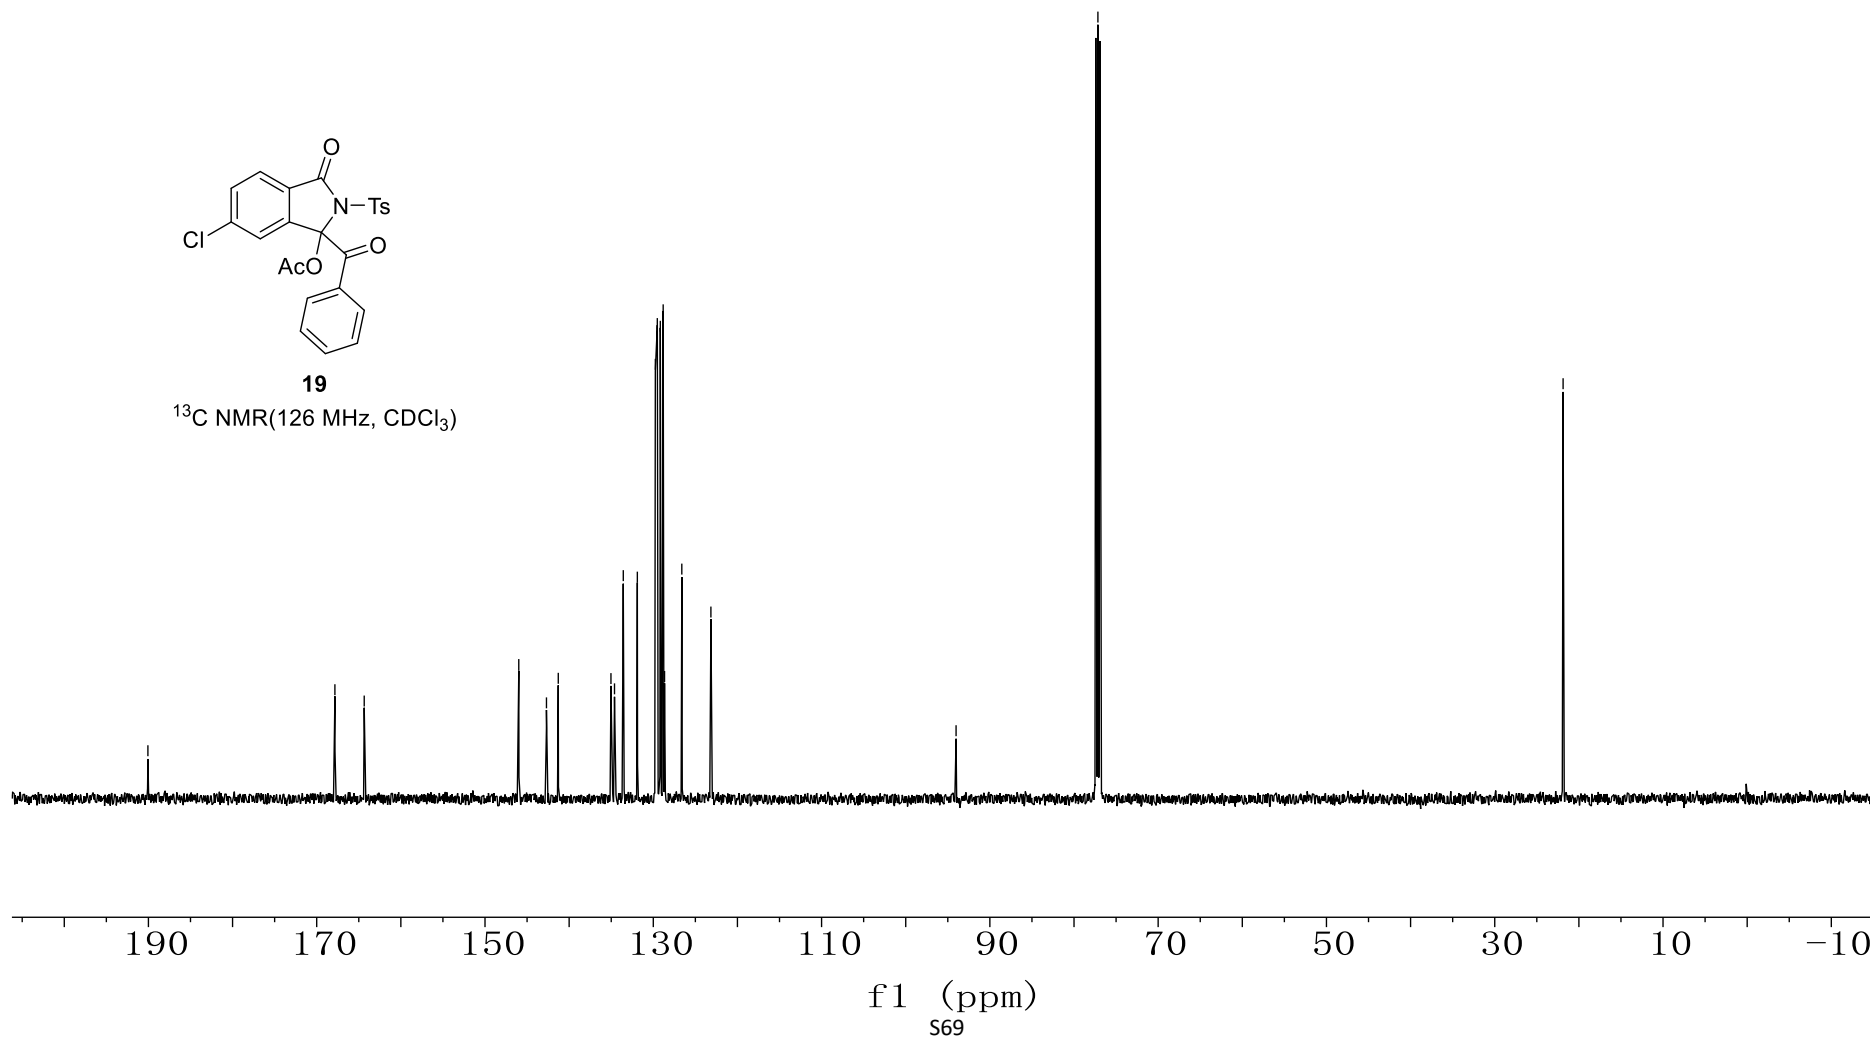

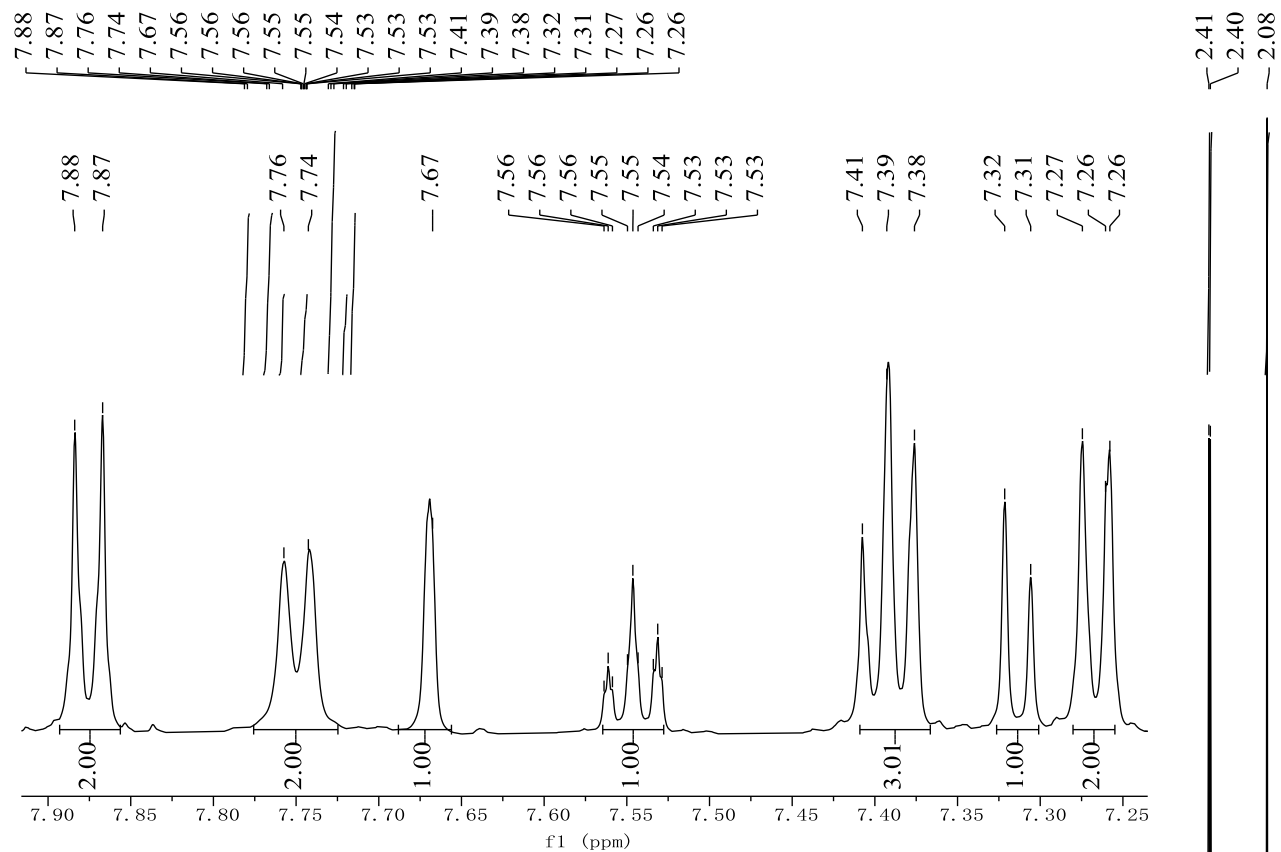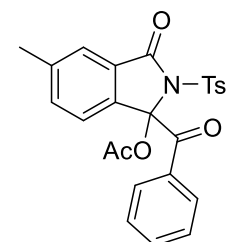

**20**

<sup>1</sup>H NMR(500 MHz, CDCl<sub>3</sub>)

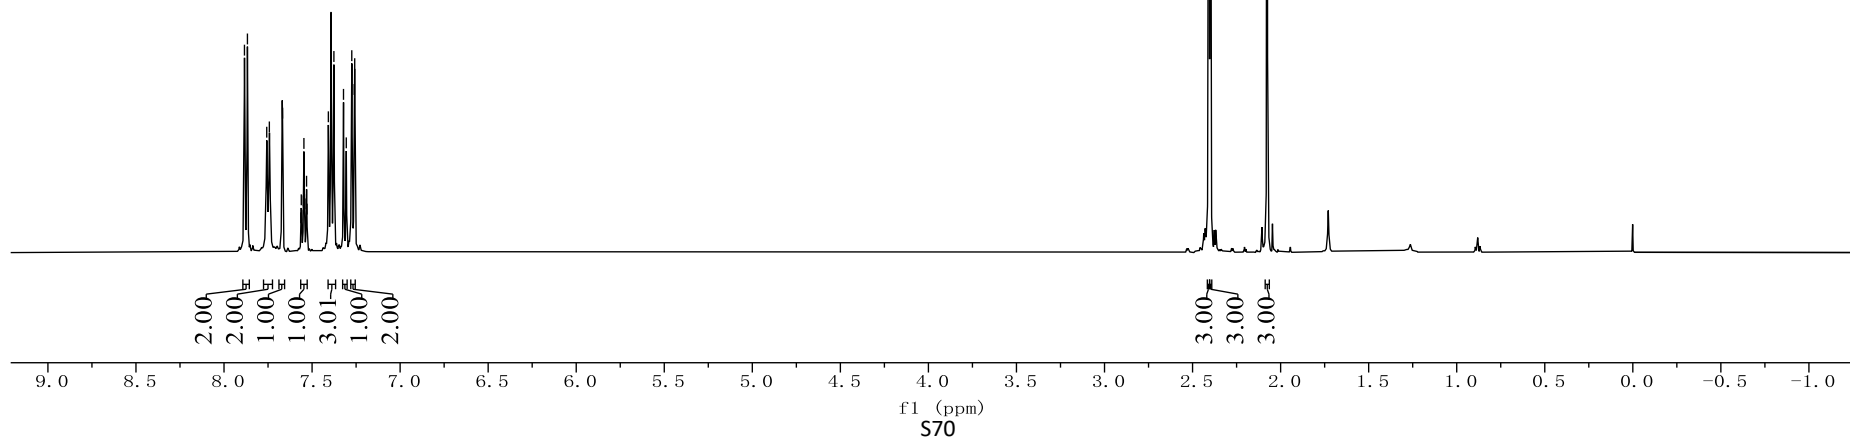

-190.25

167.86

165.47

145.66

142.13

138.13

135.68

135.26

134.78

133.16

130.34

129.55

129.39

129.01

128.63

125.68

122.77

94.62

77.16

21.89

21.78

21.55

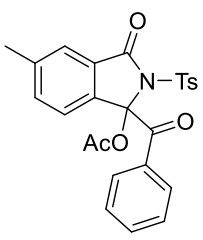

20

<sup>13</sup>C NMR(126 MHz, CDCl<sub>3</sub>)

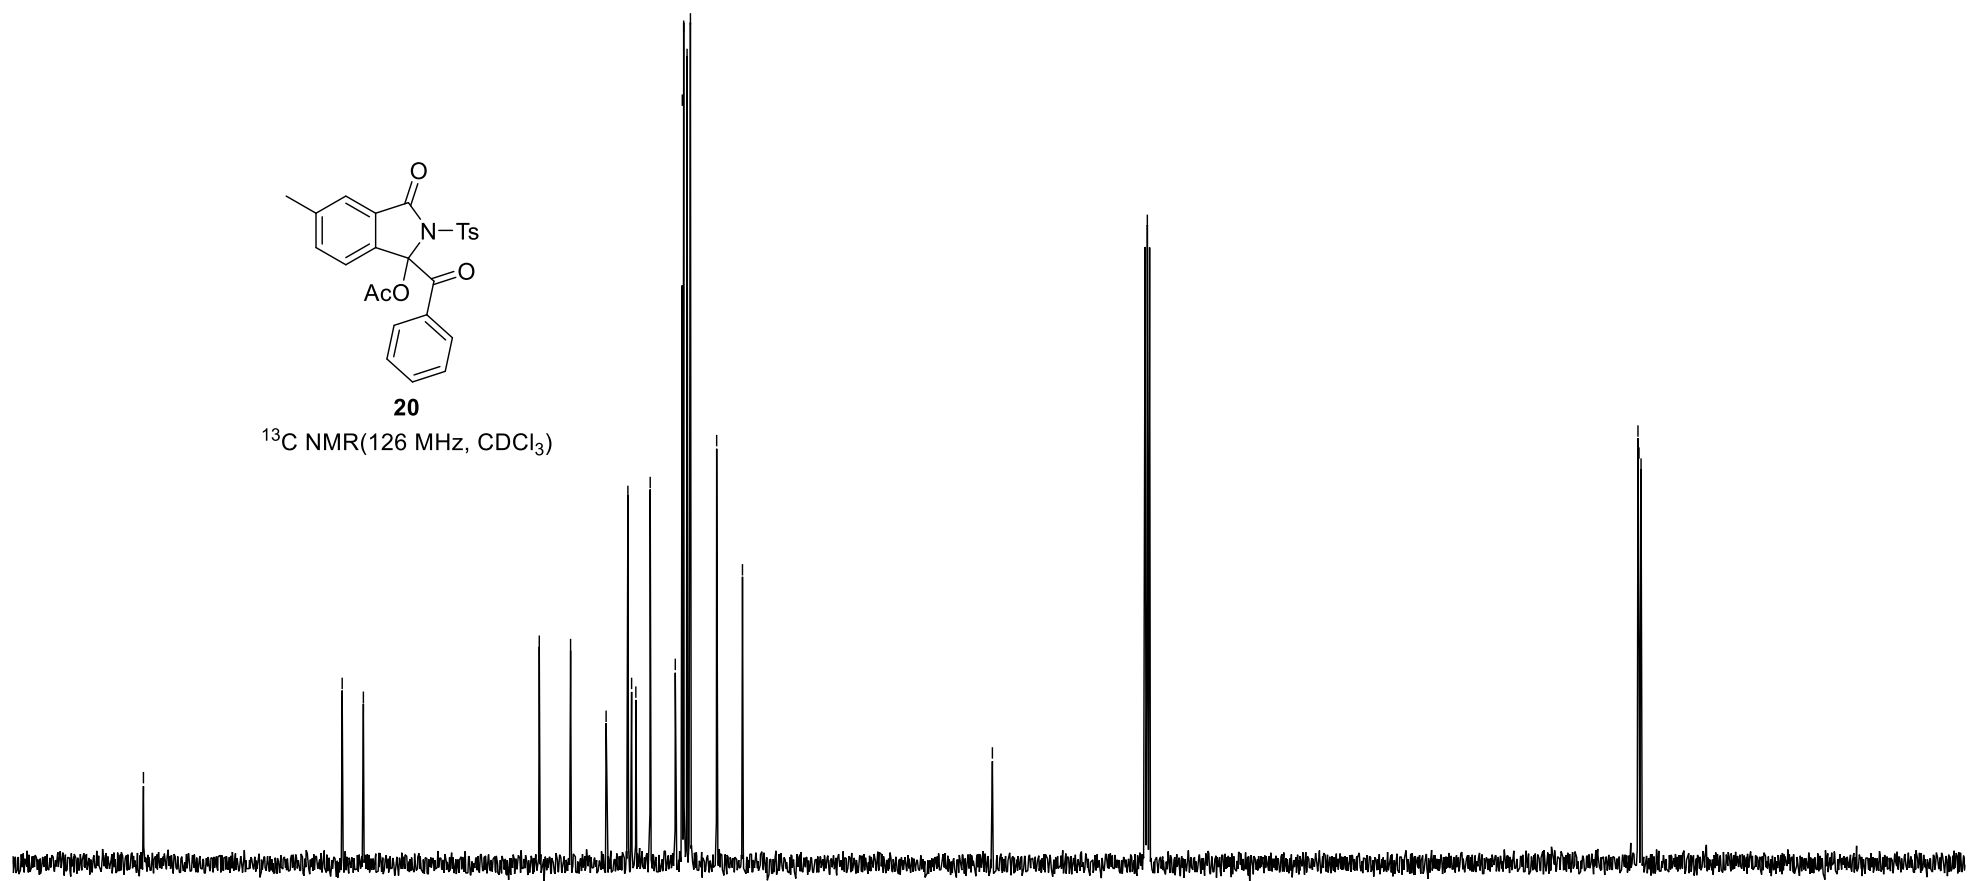

190

170

150

130

110

90

70

50

30

10

-10

f1 <sup>571</sup>(ppm)

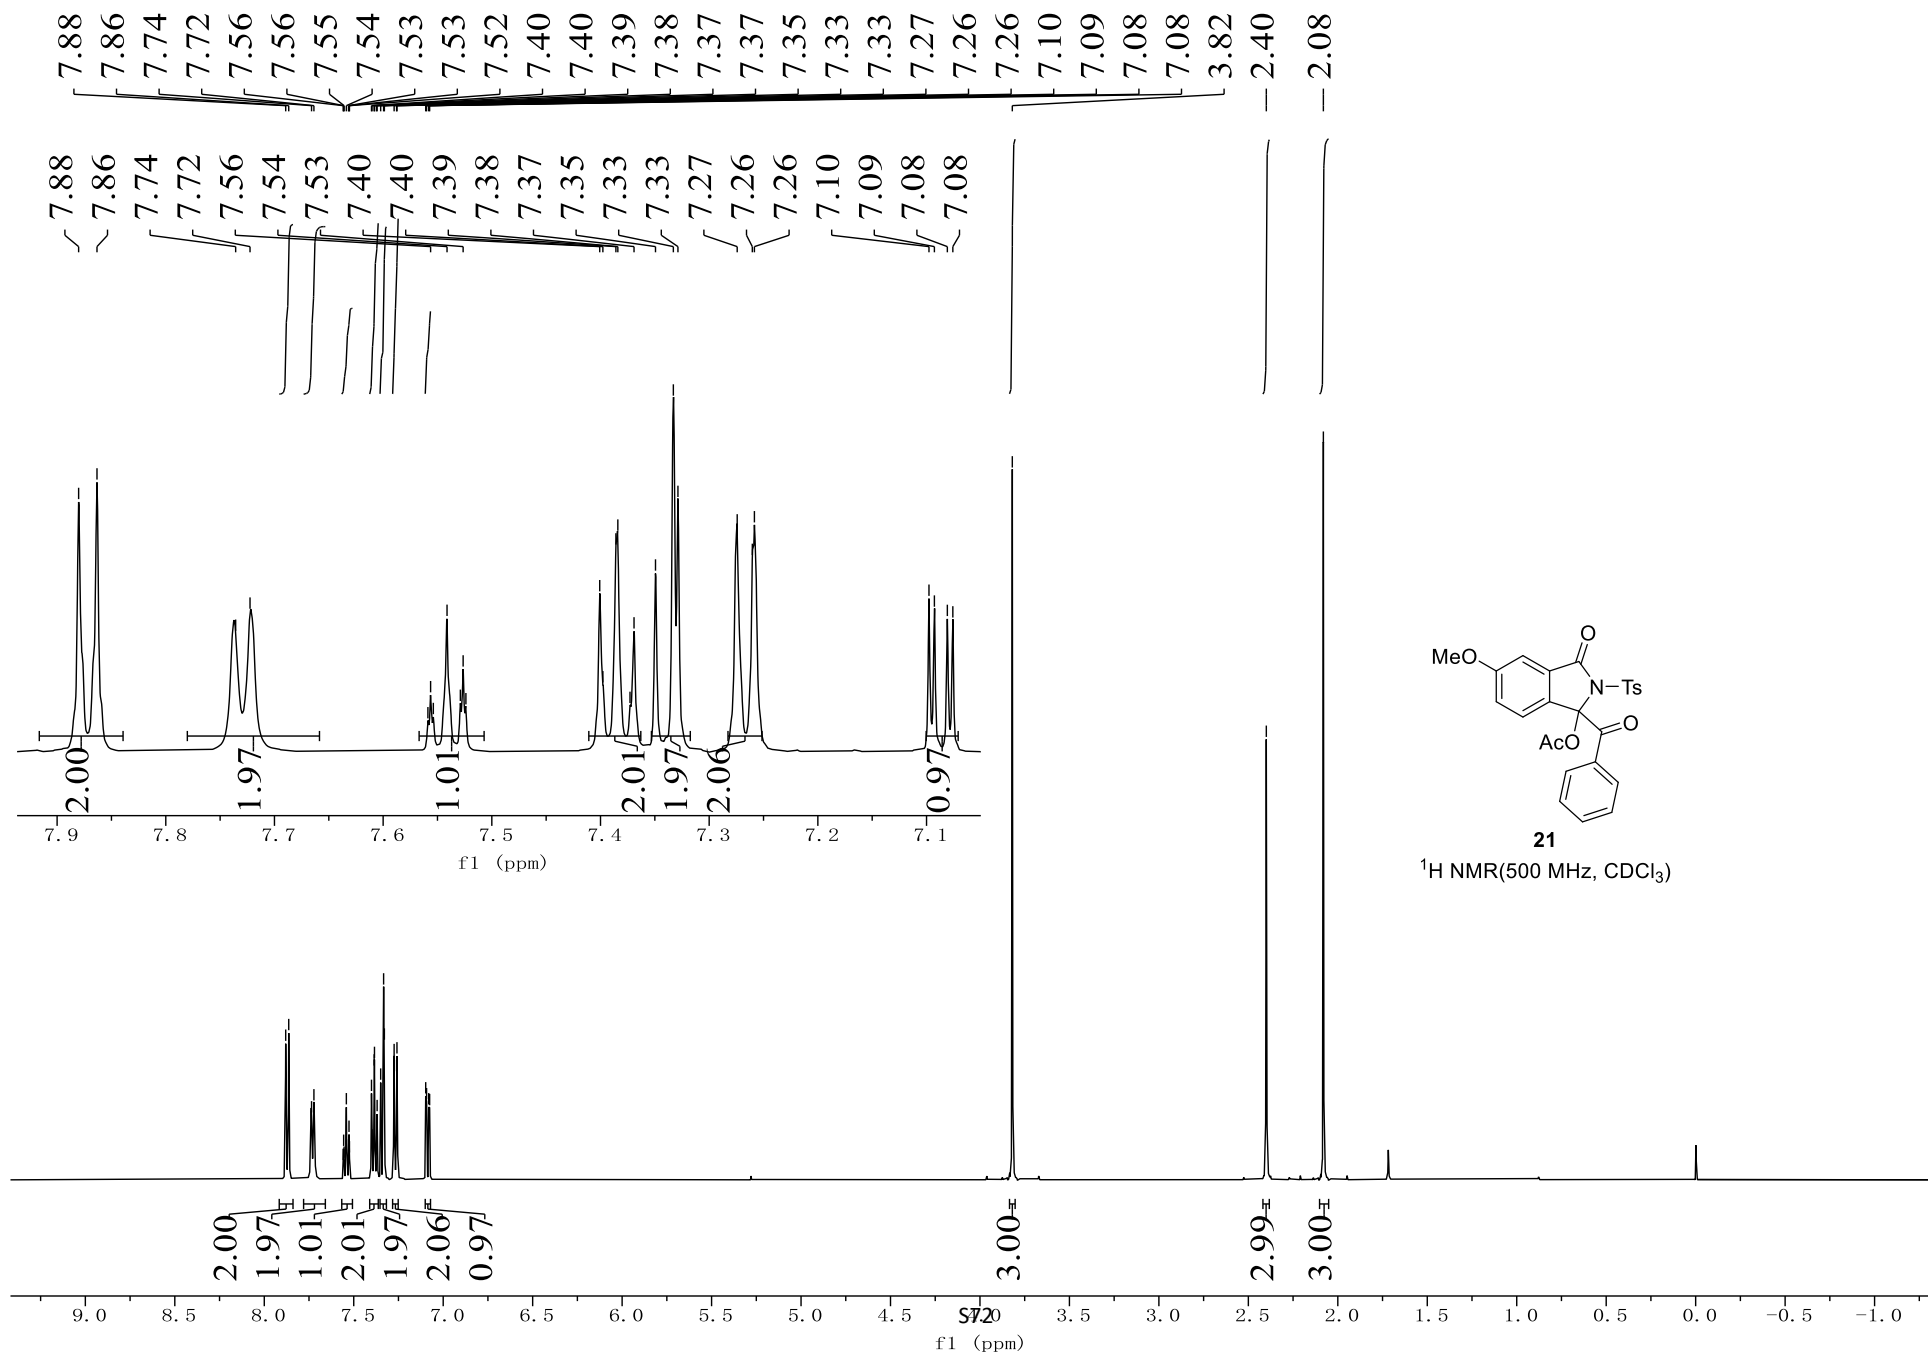



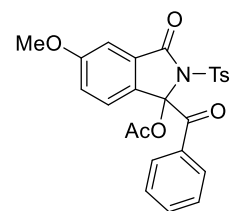

**21**

<sup>13</sup>C NMR (126 MHz, CDCl<sub>3</sub>)

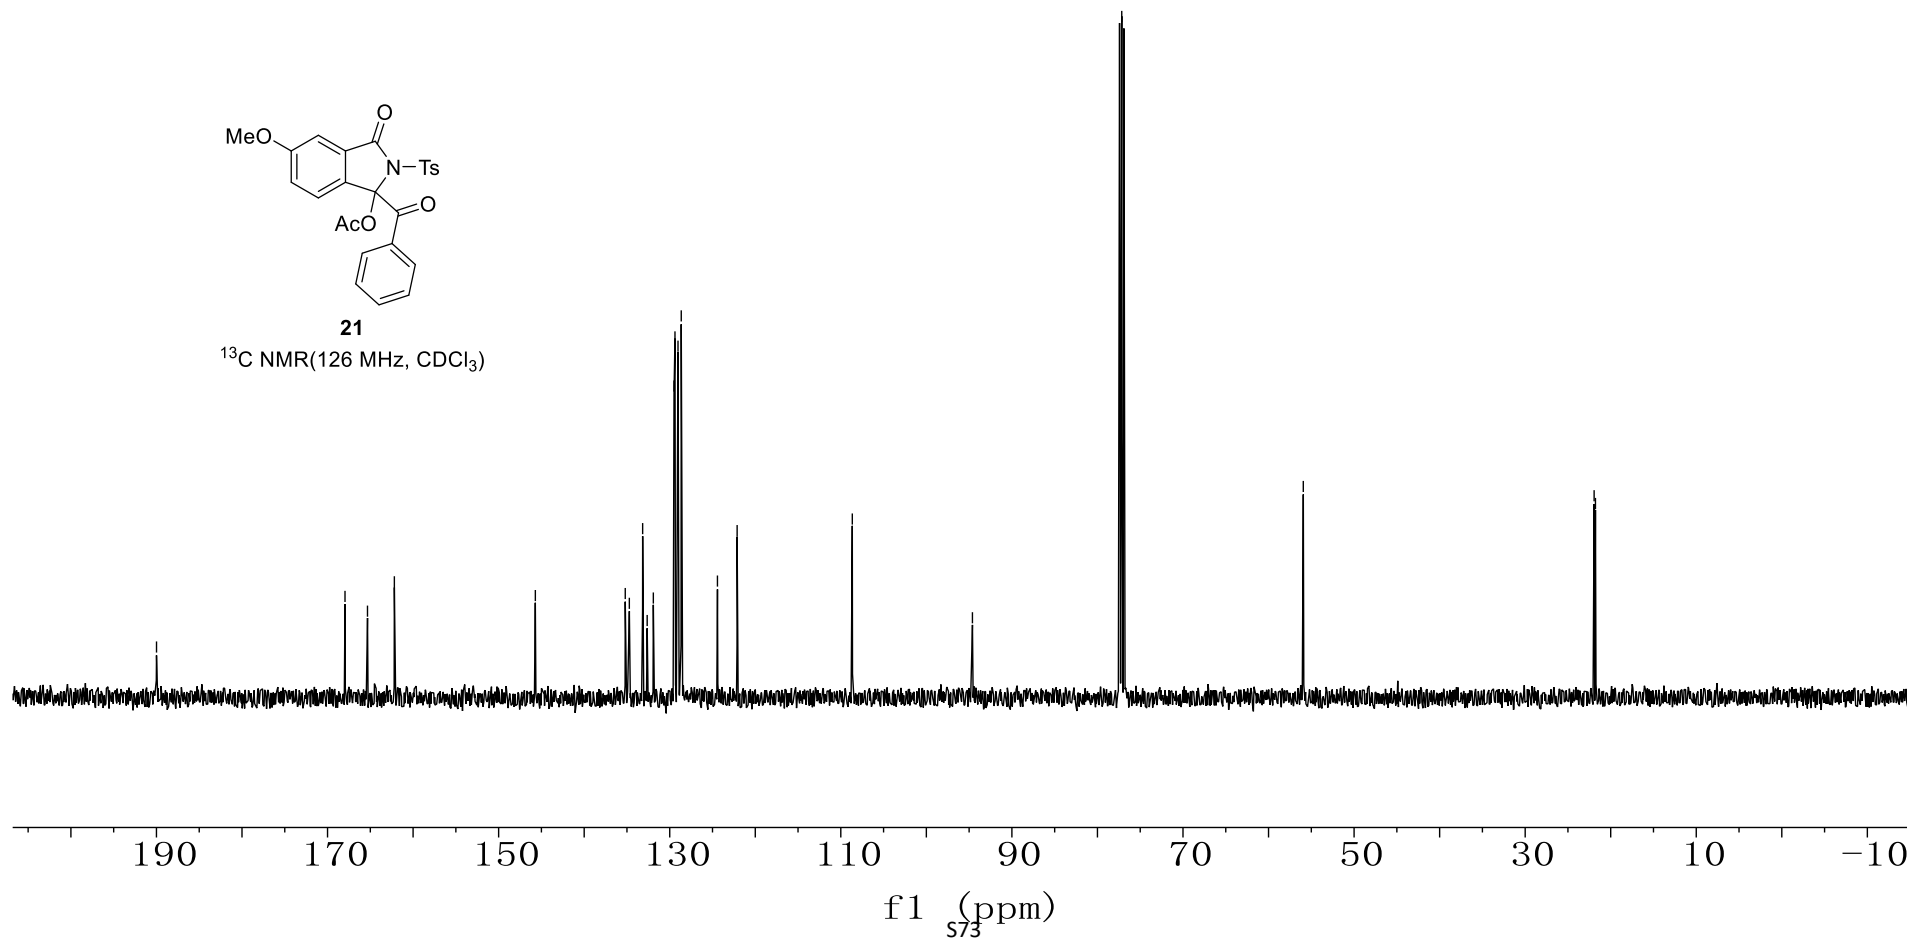

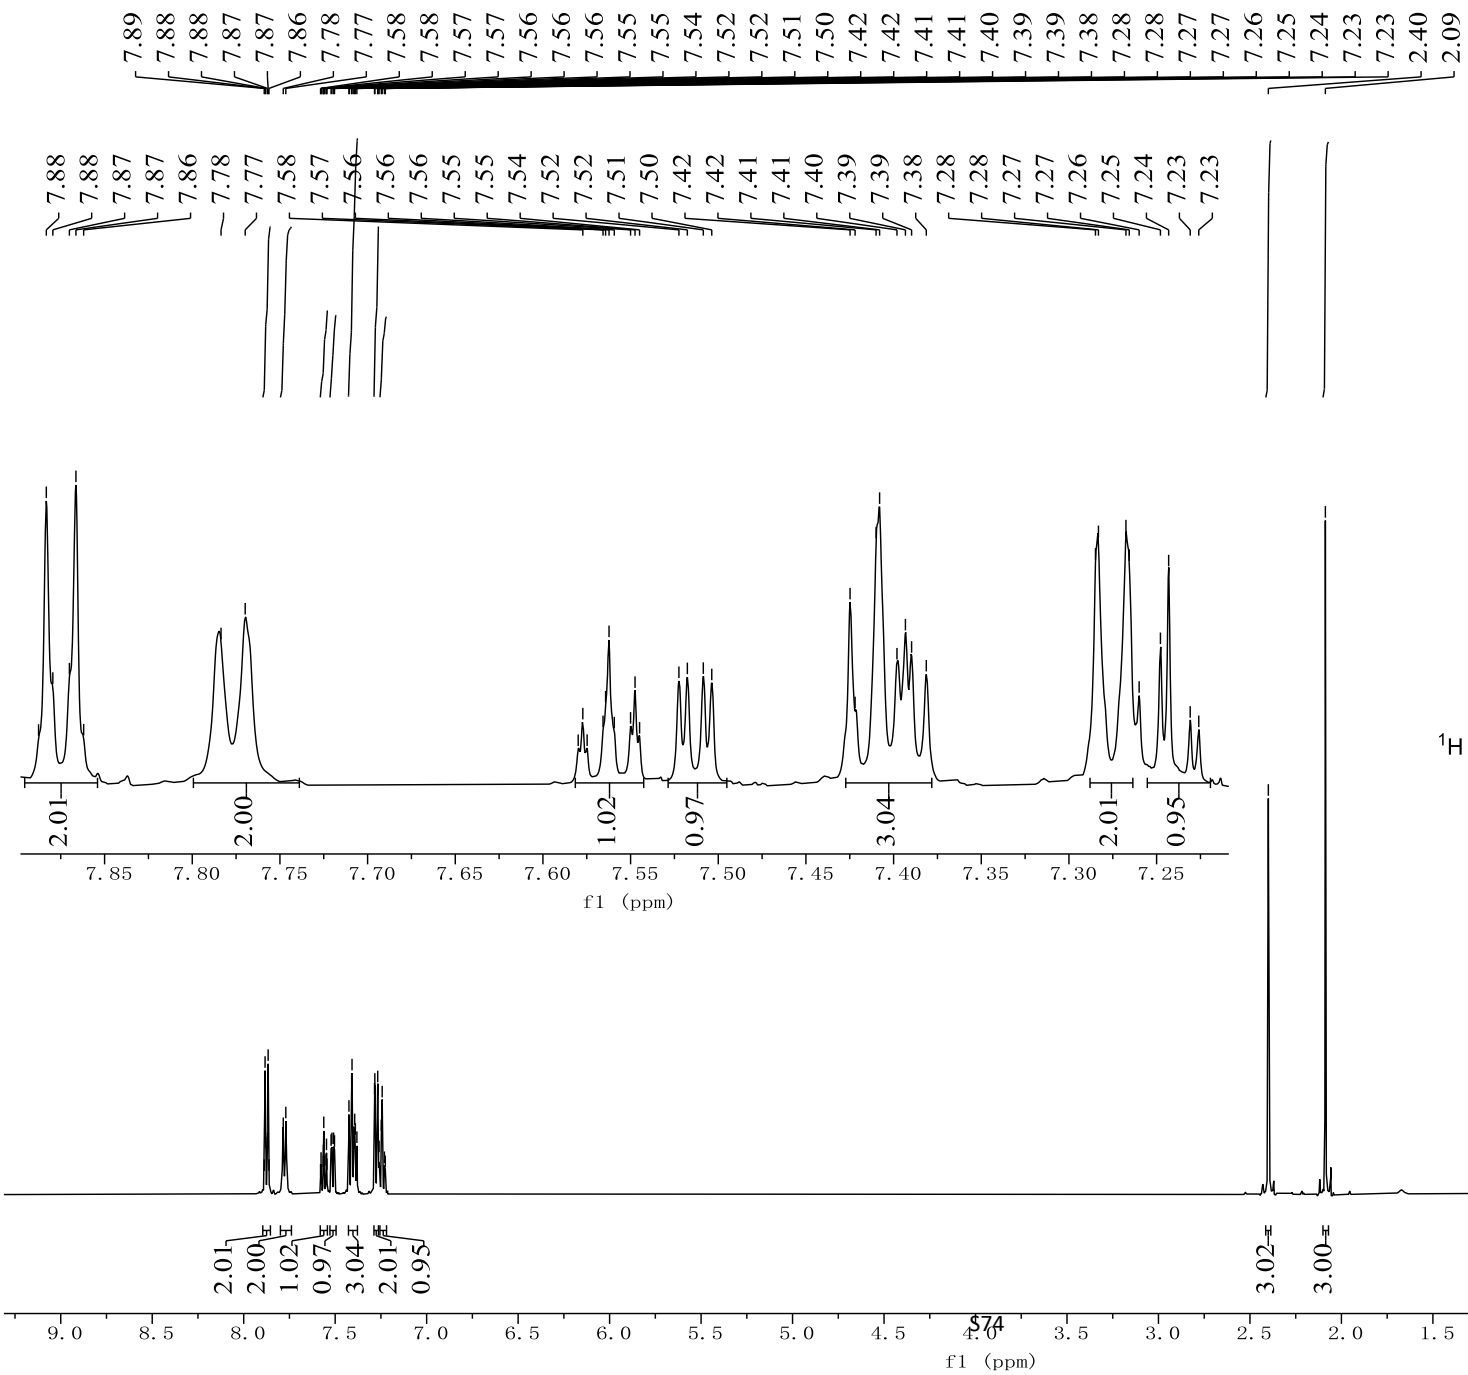

— 189.96

167.92  
165.28  
164.24  
164.21  
163.26  
146.01  
136.61  
136.58  
134.97  
134.60  
133.45  
132.69  
132.62  
129.65  
129.50  
129.15  
128.77  
125.02  
124.95  
122.25  
122.07  
112.64  
112.44  
94.42  
77.16

21.89  
21.84

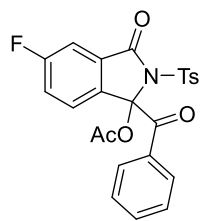

**22**

<sup>13</sup>C NMR (126 MHz, CDCl<sub>3</sub>)

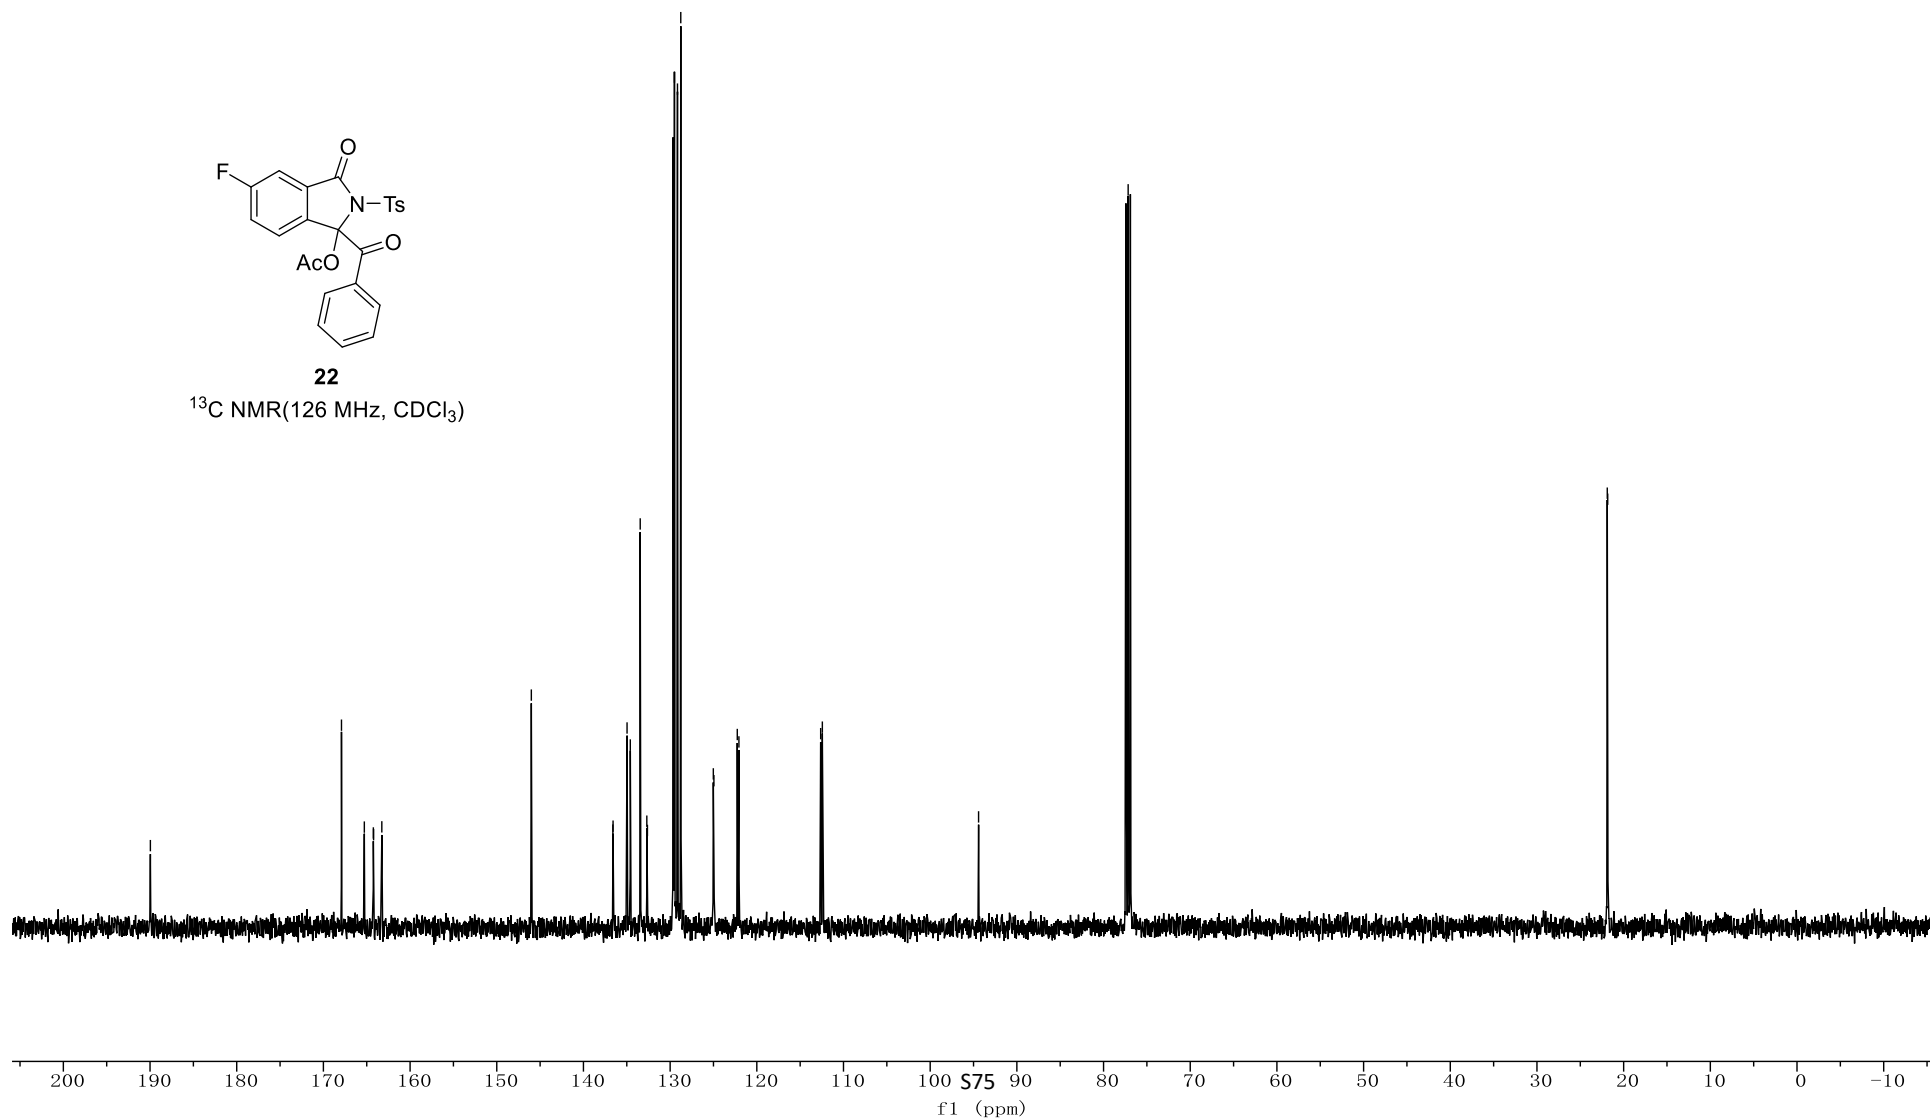

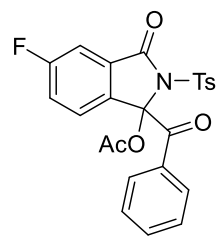

**22**

$^{19}\text{F}$  NMR(471 MHz,  $\text{CDCl}_3$ )

--106.61

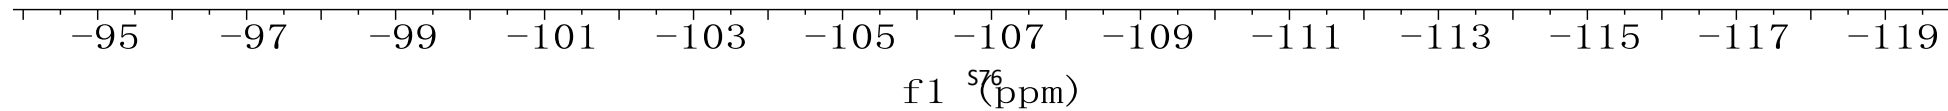

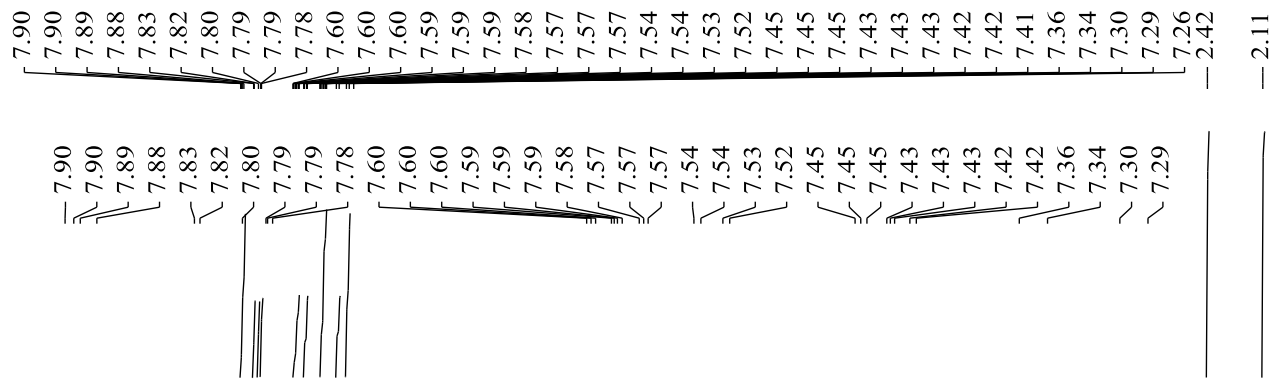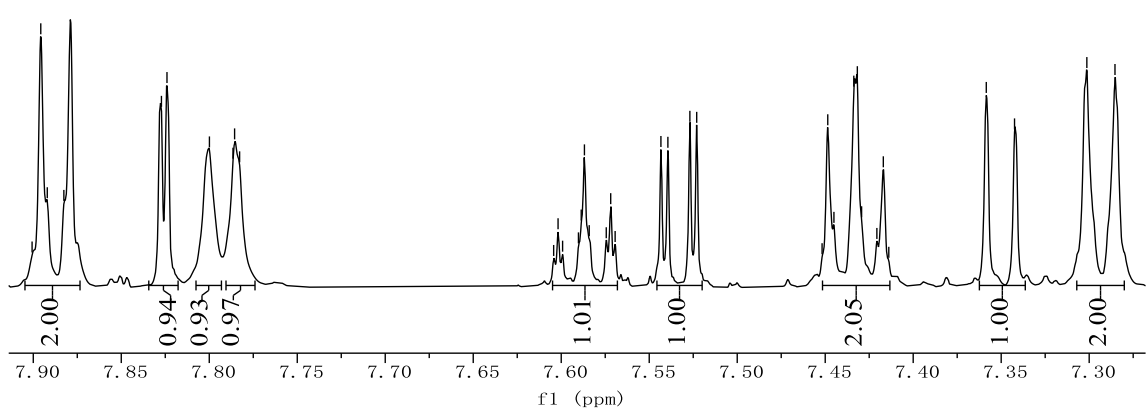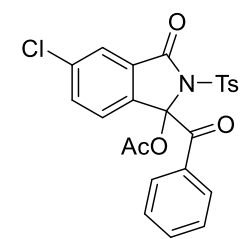

**23**  
<sup>1</sup>H NMR(500 MHz, CDCl<sub>3</sub>)

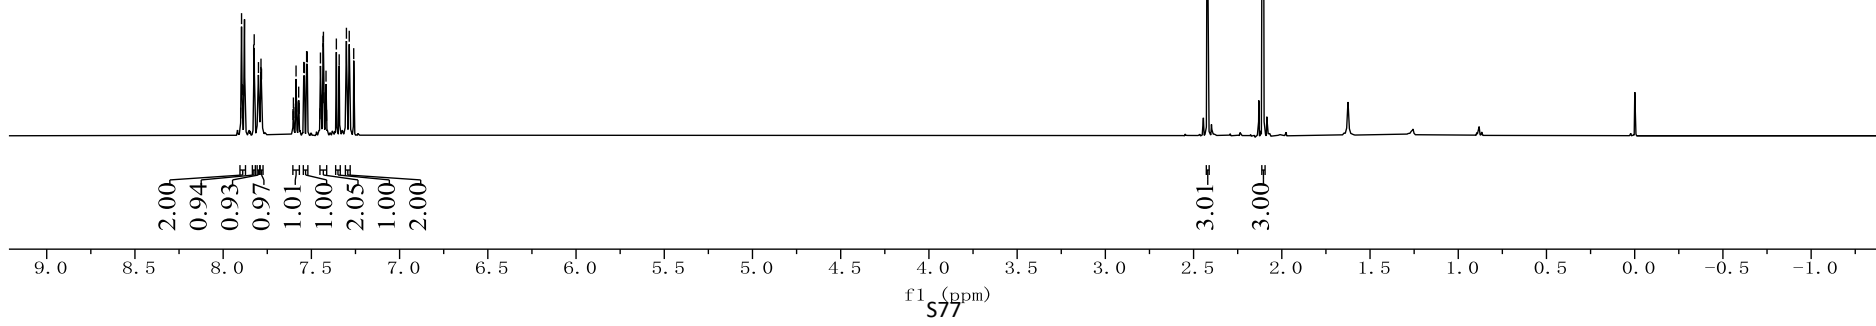

- 189.92

167.92

164.11

146.04

139.21

137.87

134.97

134.84

134.61

133.50

132.00

129.69

129.53

129.19

128.81

125.58

124.18

94.41

77.16

- 21.88

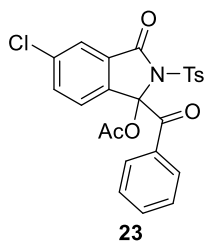

<sup>13</sup>C NMR (126 MHz, CDCl<sub>3</sub>)

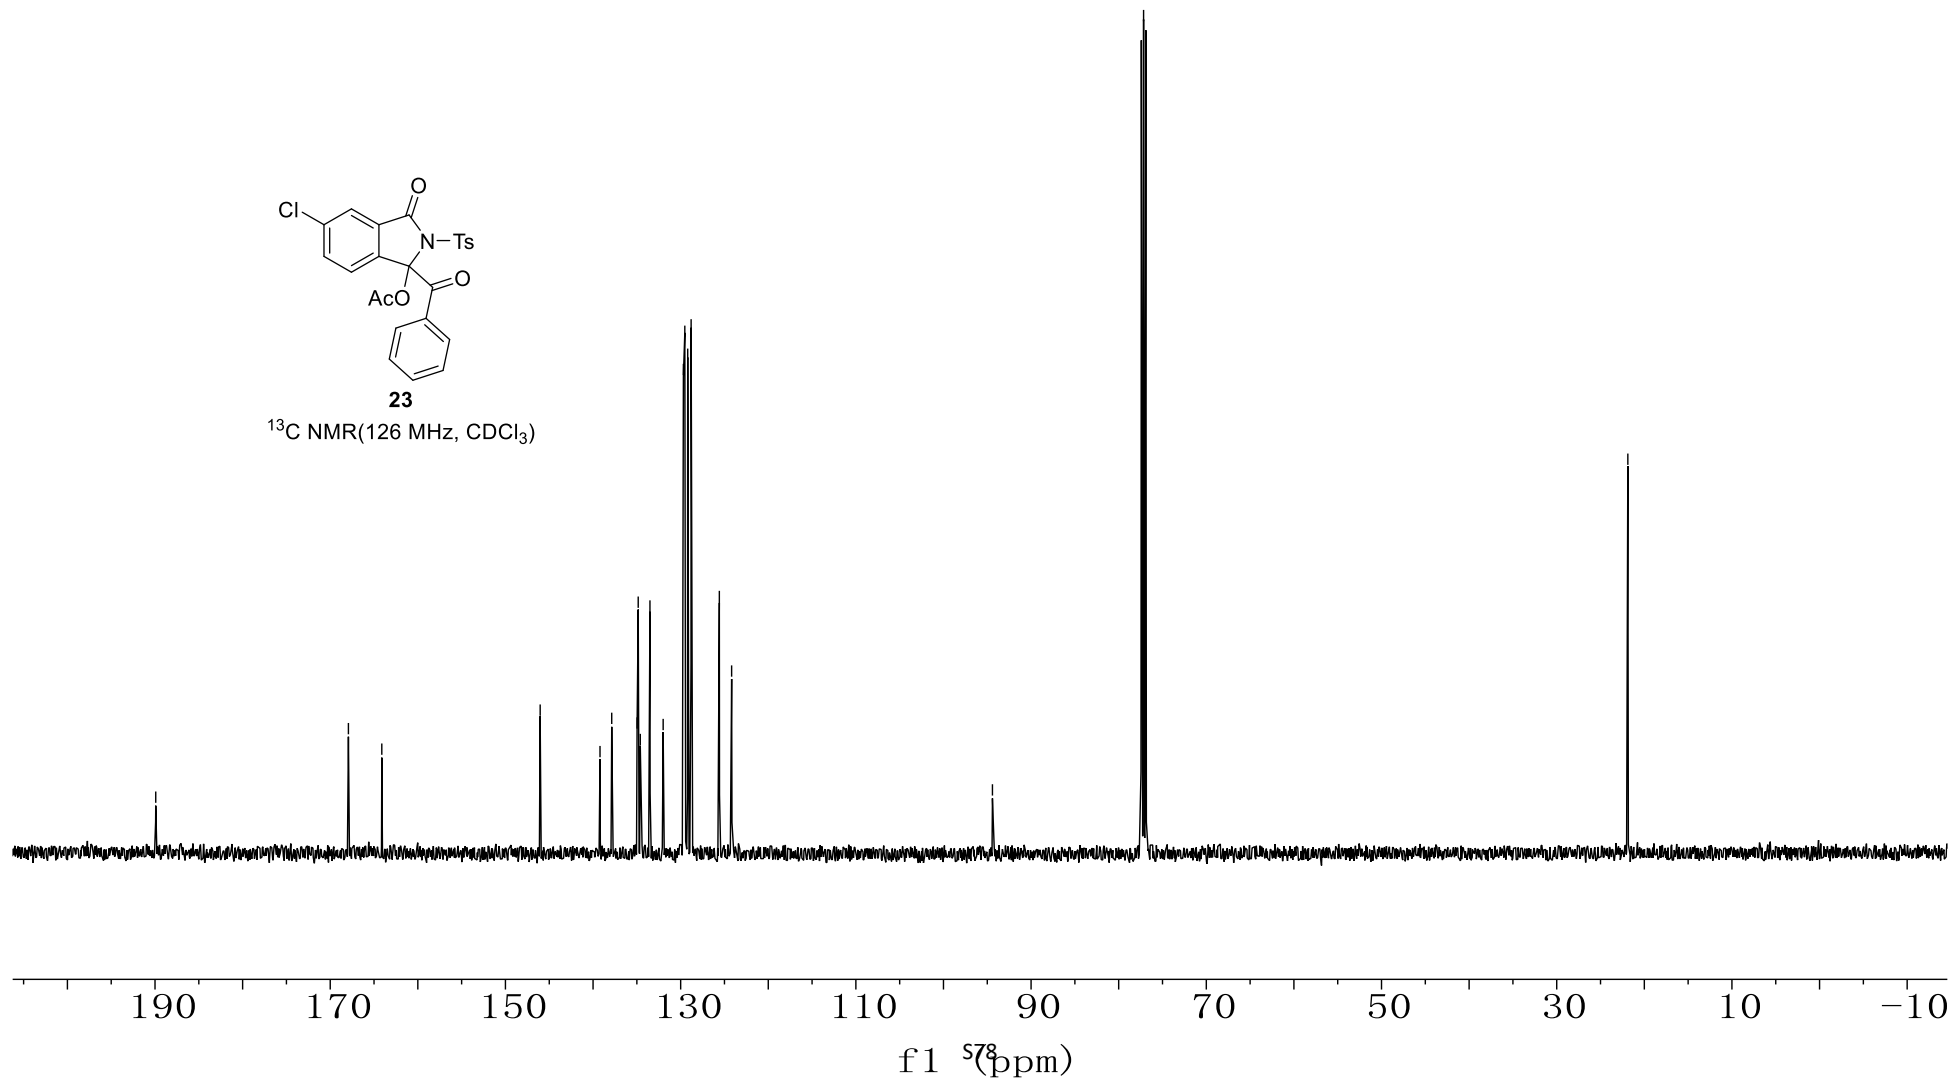

7.89  
7.87  
7.86  
7.85  
7.61  
7.61  
7.61  
7.60  
7.58  
7.58  
7.58  
7.57  
7.57  
7.56  
7.55  
7.54  
7.47  
7.45  
7.43  
7.29  
7.28  
7.28  
7.26  
7.20  
7.19  
7.18  
7.17

7.89  
7.87  
7.86  
7.85

7.61  
7.61  
7.61  
7.60  
7.58  
7.58  
7.58  
7.57  
7.57  
7.56  
7.55  
7.54  
7.47  
7.45  
7.43

7.29  
7.28  
7.26  
7.20  
7.19  
7.18  
7.17

2.41  
2.12

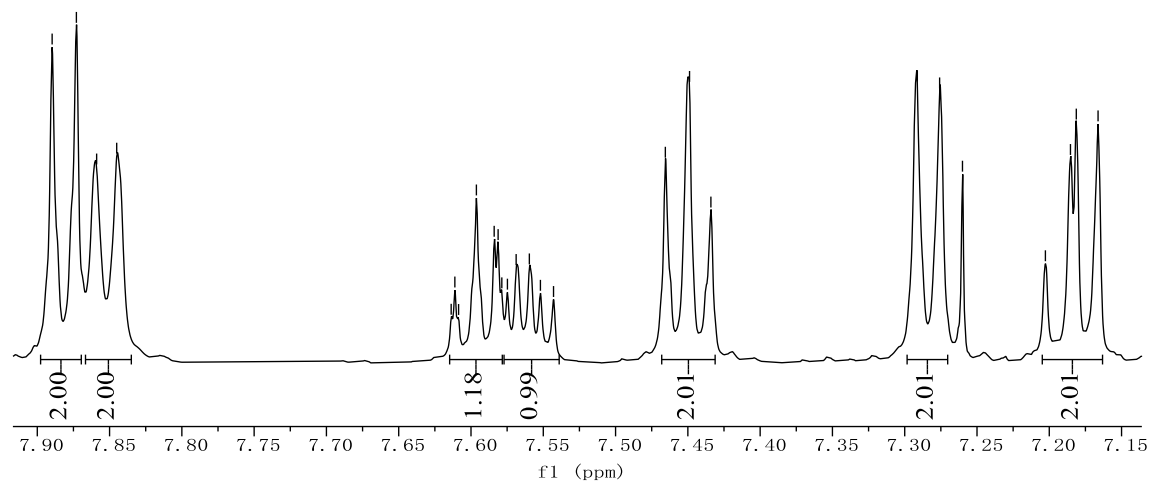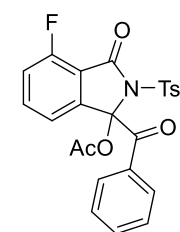

**24**

<sup>1</sup>H NMR(500 MHz, CDCl<sub>3</sub>)

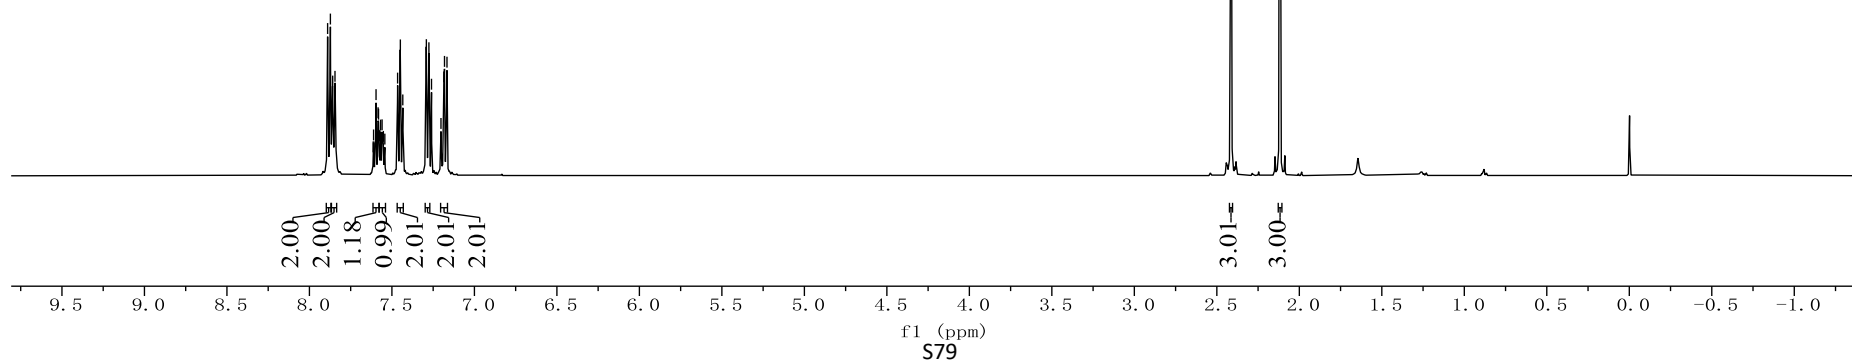

190.31  
167.78  
162.03  
160.39  
158.27  
145.98  
143.16  
137.03  
136.97  
134.88  
134.73  
133.47  
129.77  
129.50  
129.26  
128.76  
119.17  
119.02  
118.56  
118.53  
117.41  
117.30  
94.02  
77.16  
21.86

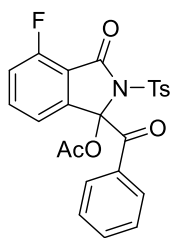

**24**

$^{13}\text{C}$  NMR(126 MHz,  $\text{CDCl}_3$ )

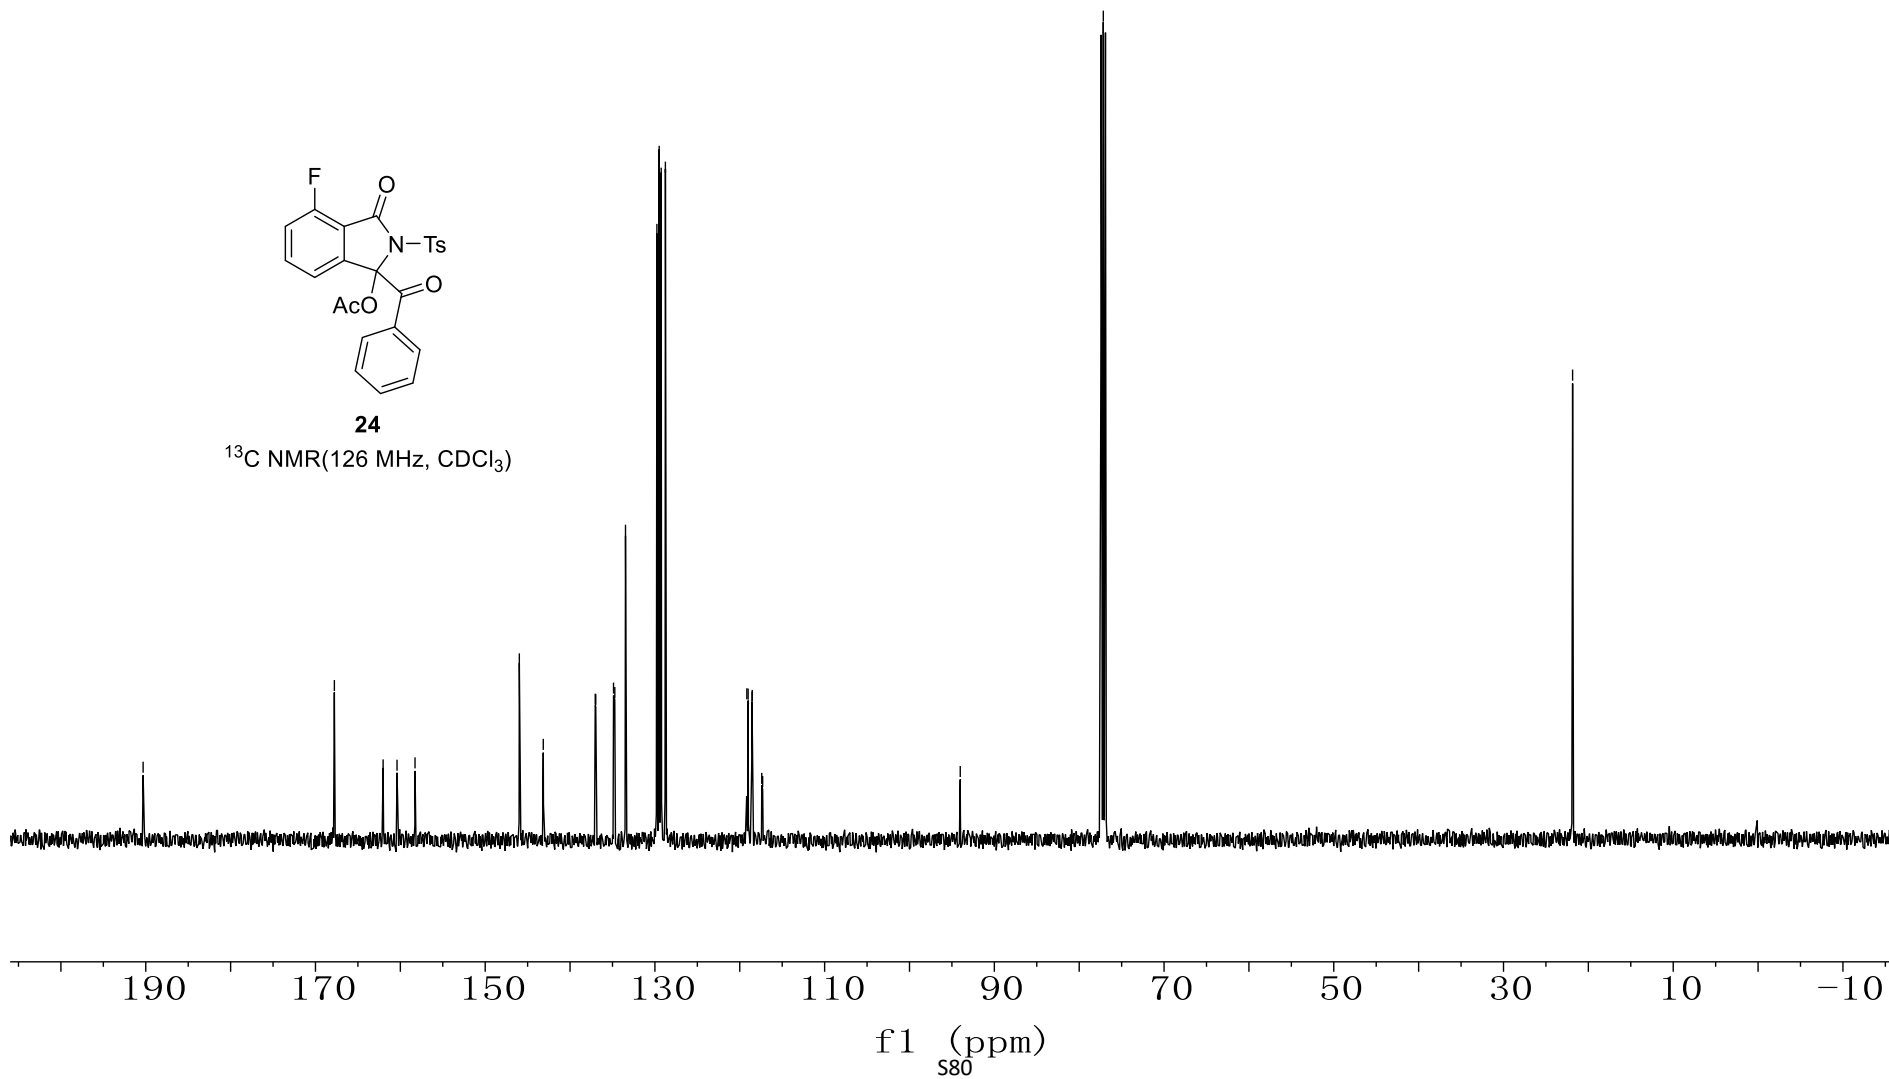



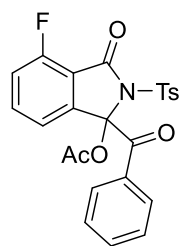

**24**

<sup>19</sup>F NMR(471 MHz, CDCl<sub>3</sub>)

-112.70

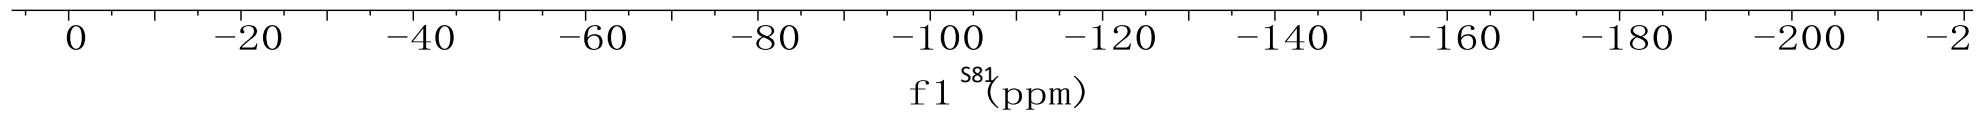

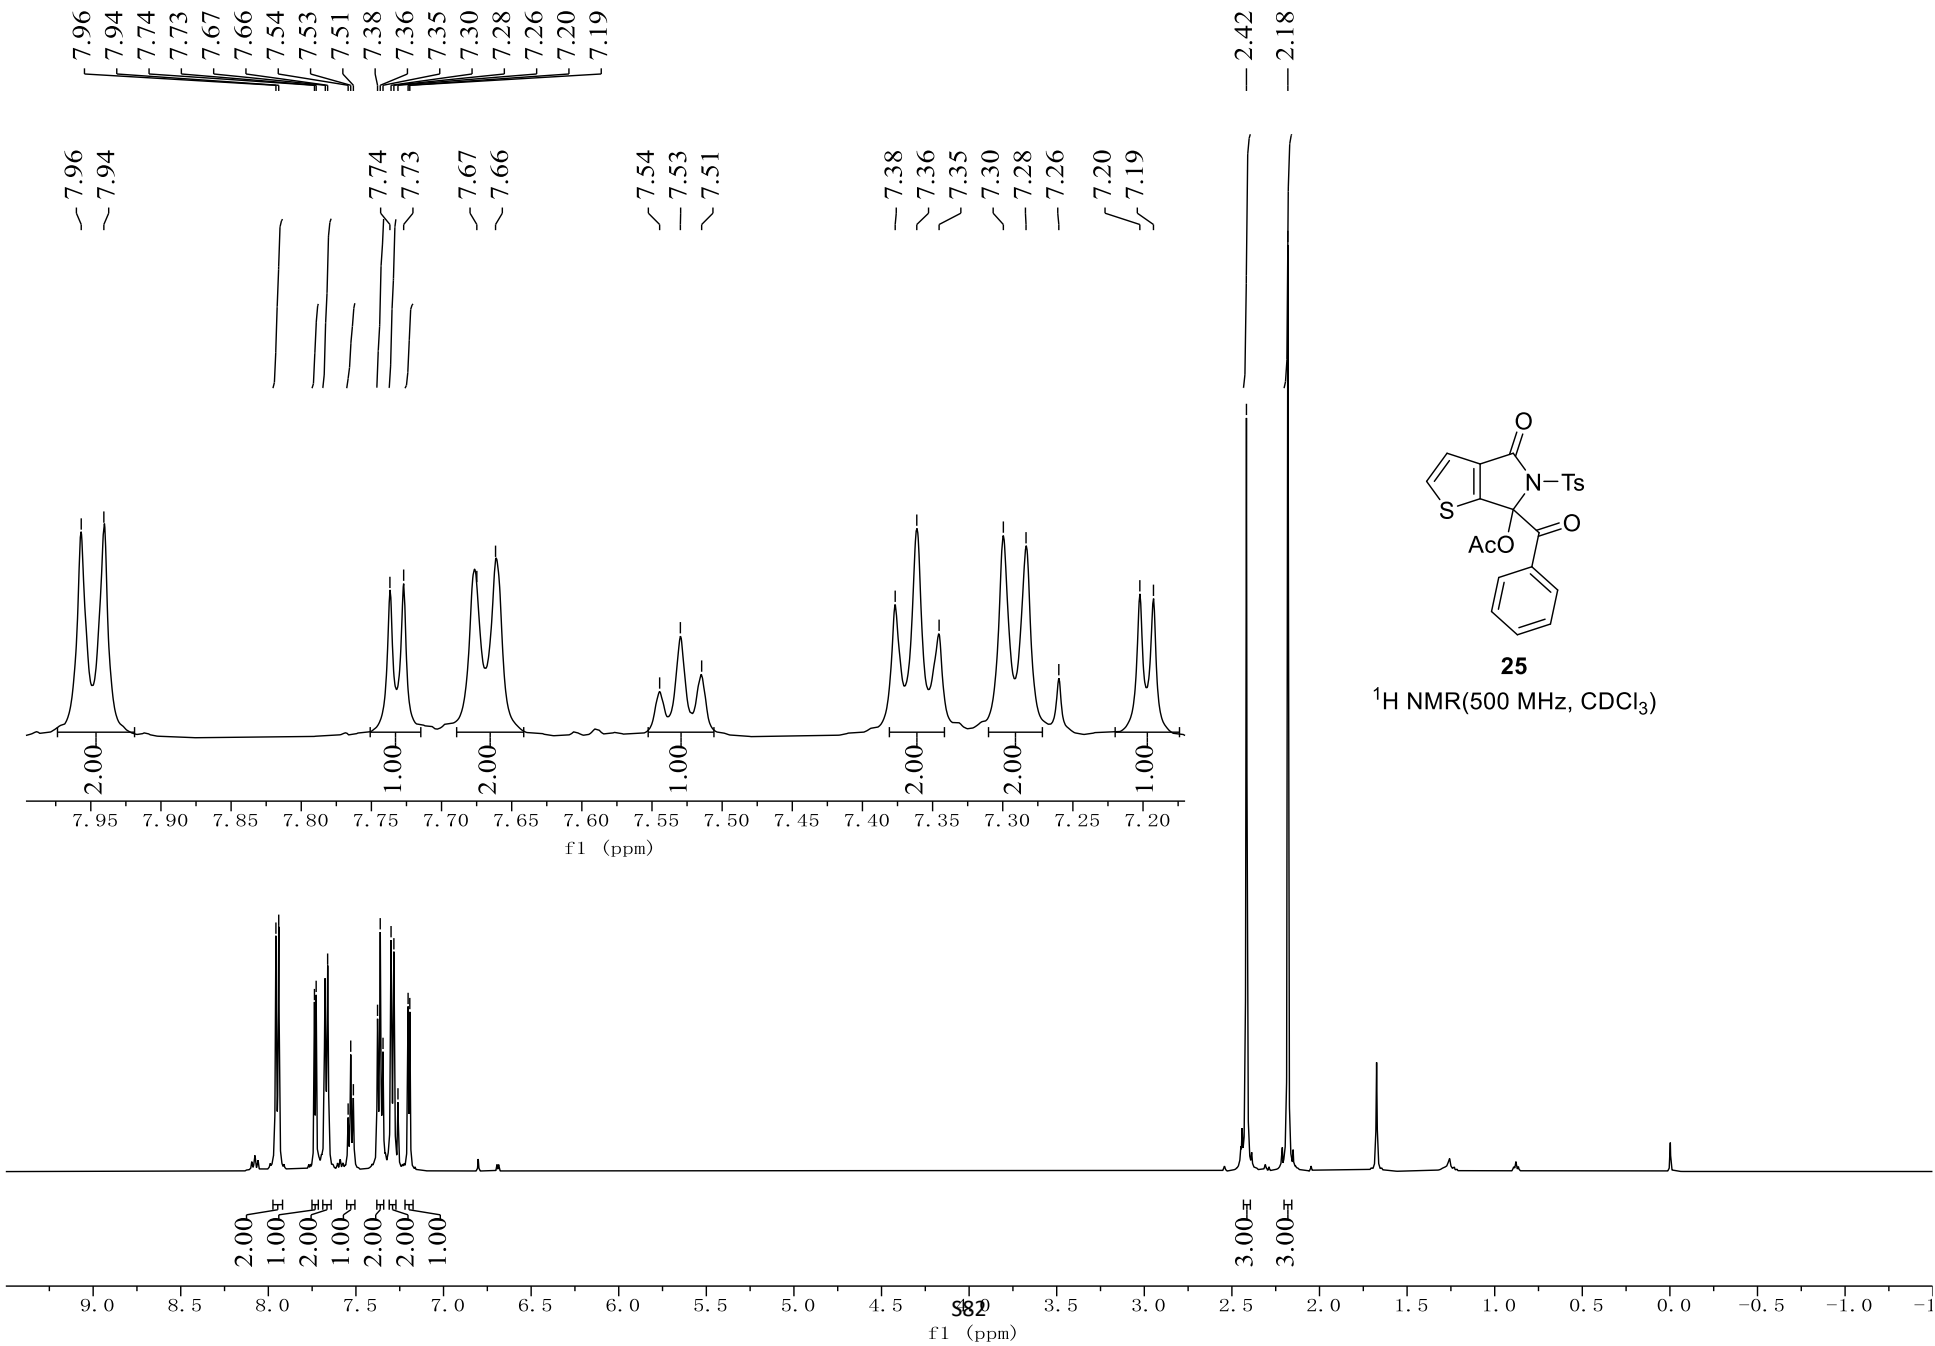

— 186.79  
— 167.98  
— 159.93  
— 151.97  
— 145.72  
— 138.66  
— 135.66  
— 134.52  
— 133.83  
— 133.62  
— 129.42  
— 129.18  
— 129.06  
— 128.85  
— 125.08

— 93.54

— 77.16

— 21.81  
— 21.47

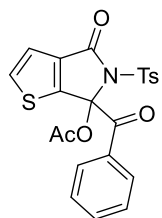

**25**

<sup>13</sup>C NMR(126 MHz, CDCl<sub>3</sub>)

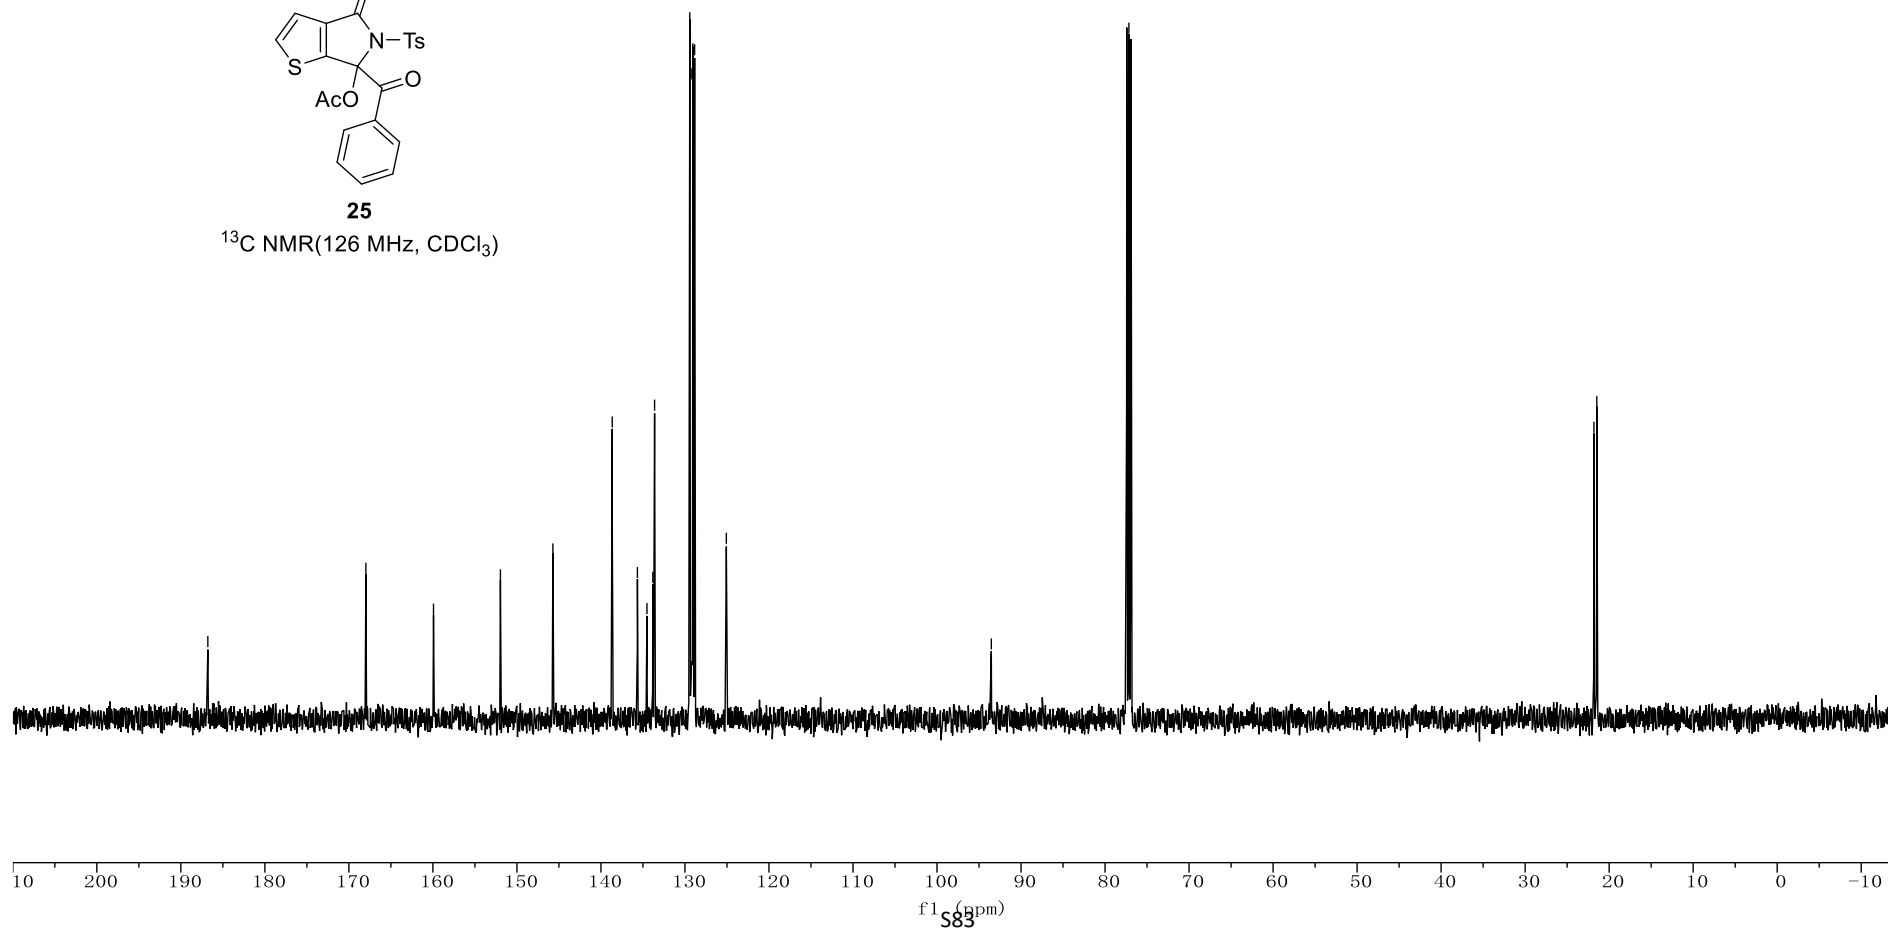

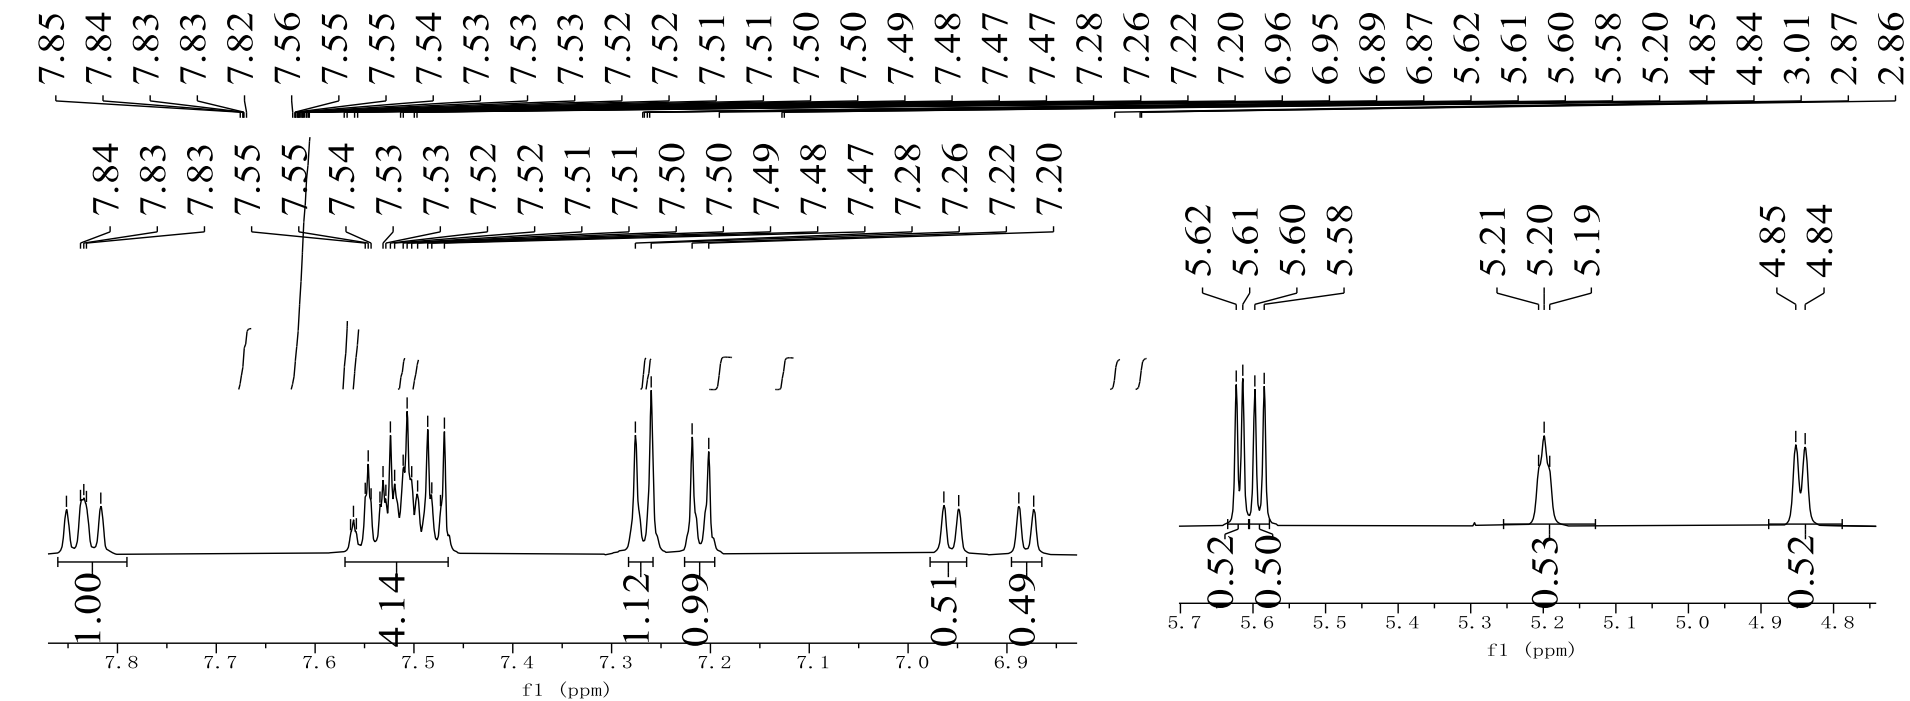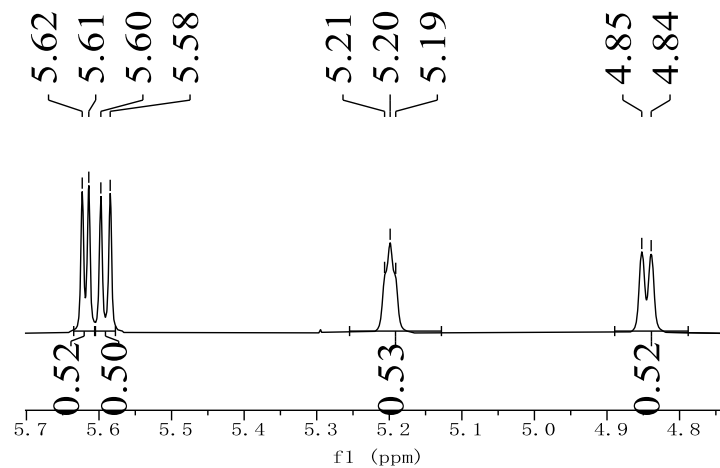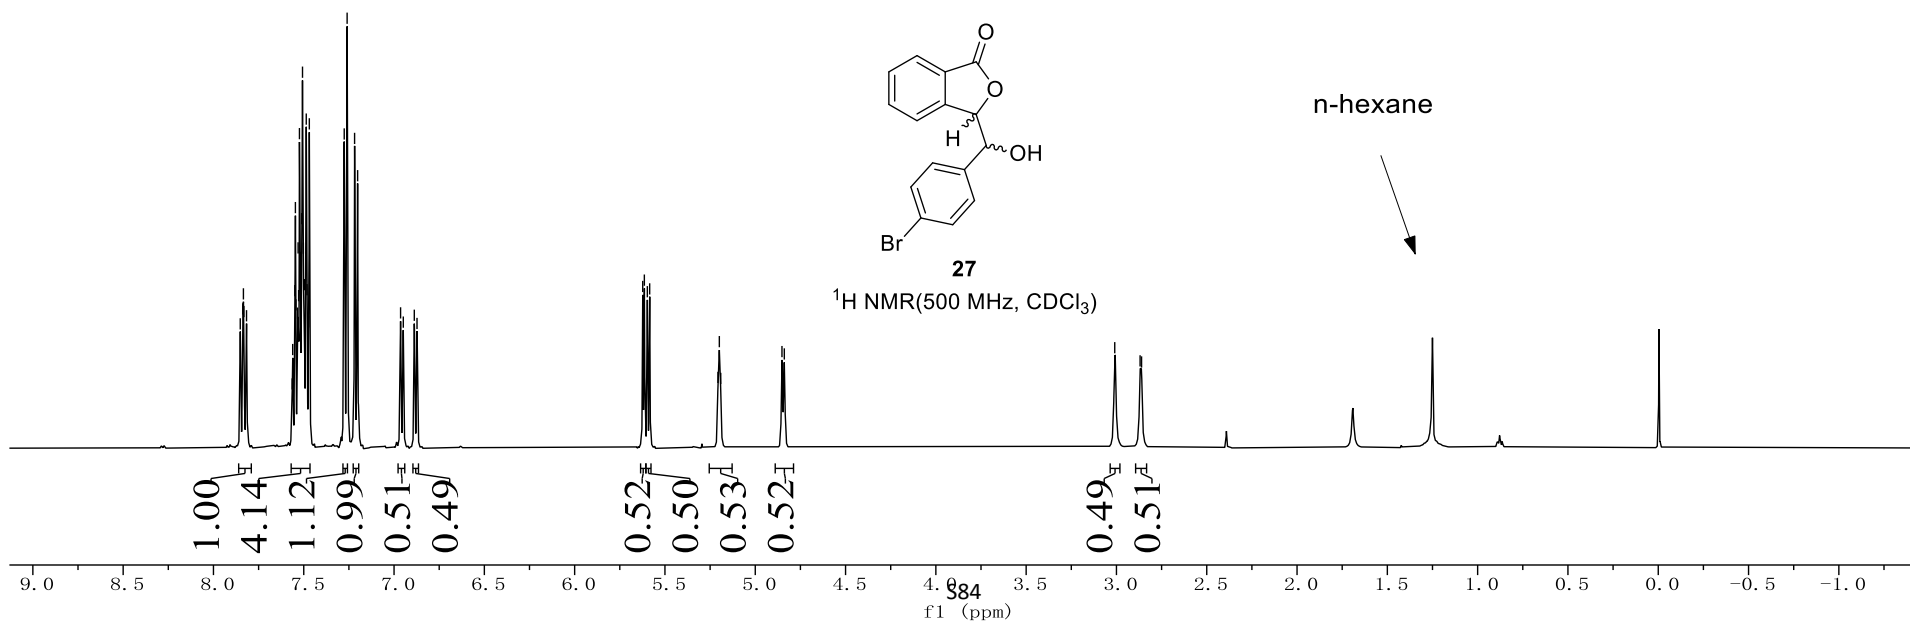

170.52  
170.04

145.88  
145.67  
137.29  
136.64  
133.98  
133.83  
131.83  
129.82  
129.71  
129.40  
128.34  
126.95  
126.61  
125.87  
125.80  
123.59  
123.53  
123.14  
122.53  
83.70  
83.54  
77.16  
75.56  
73.35

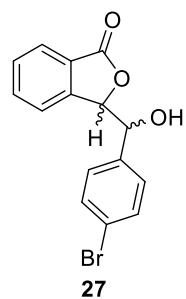

<sup>13</sup>C NMR(126 MHz, CDCl<sub>3</sub>)

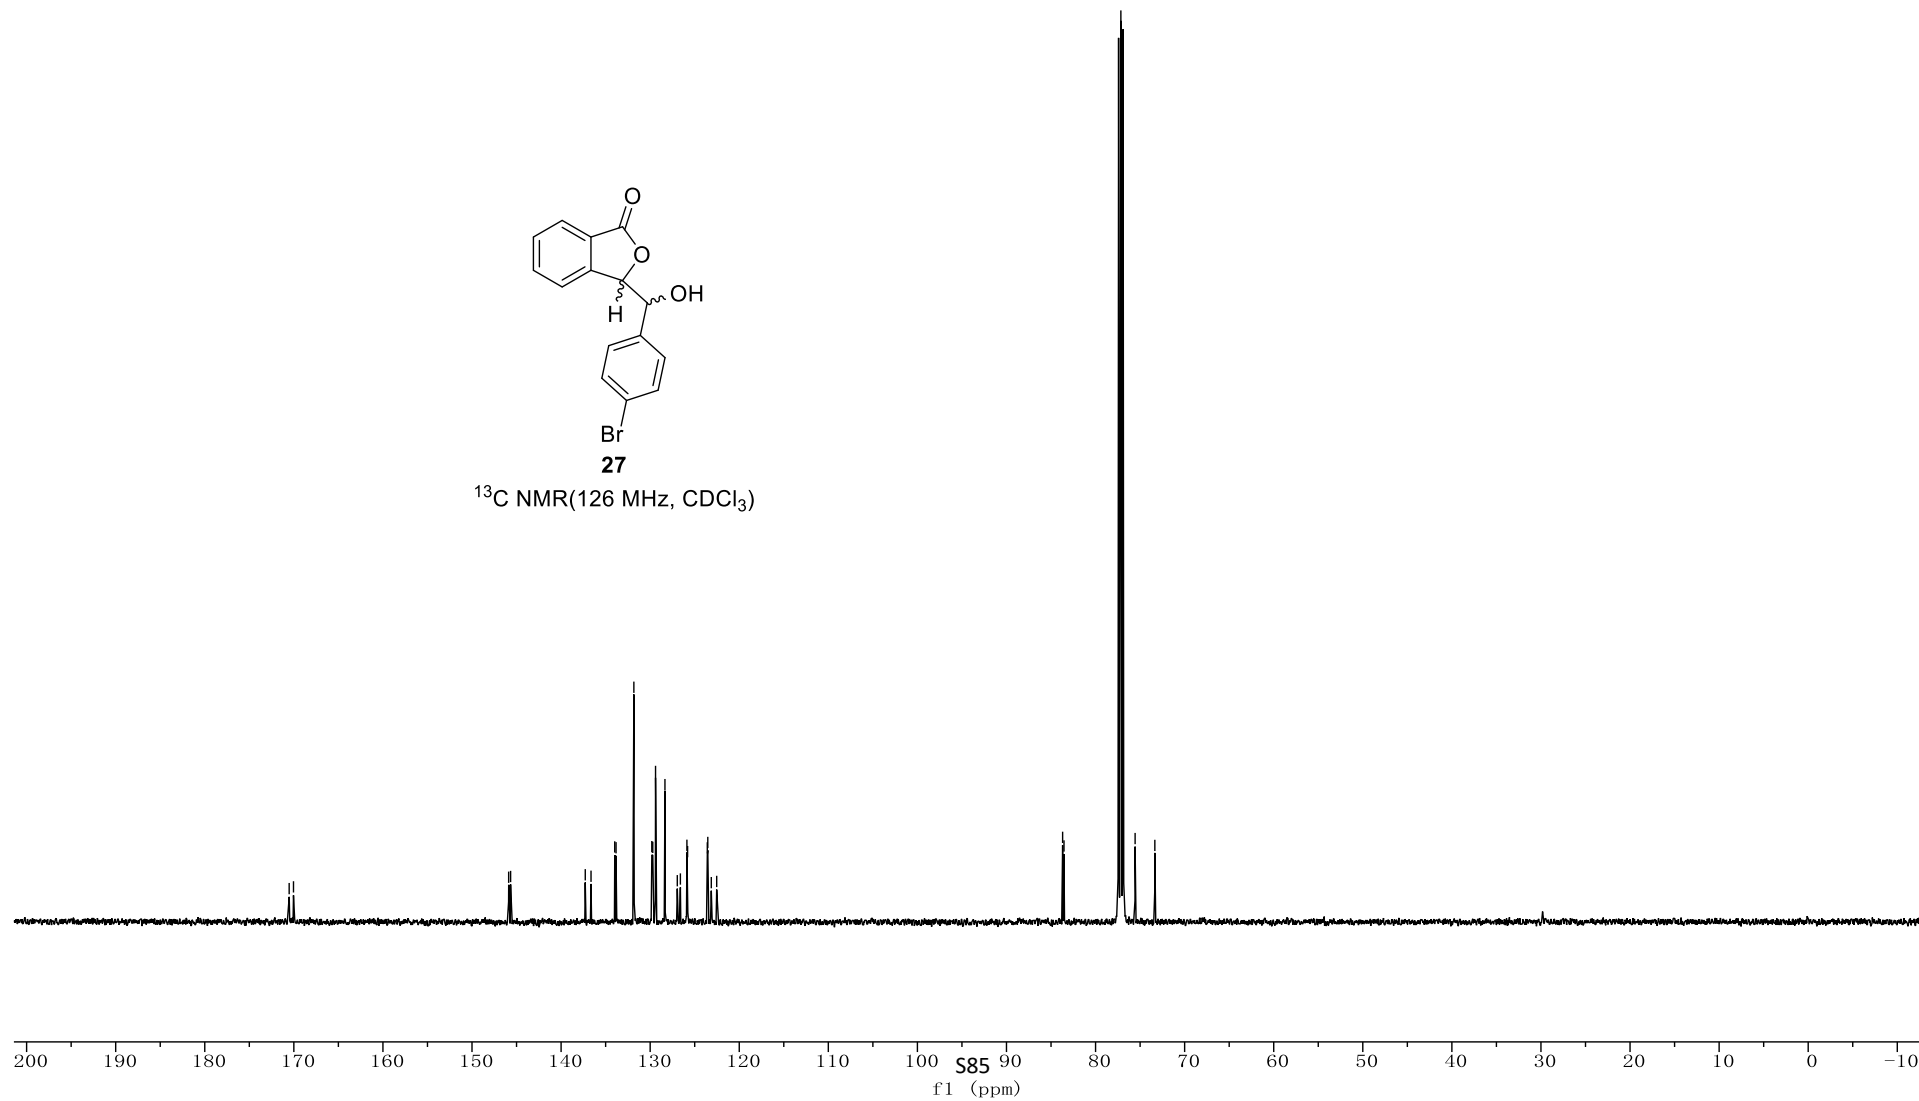

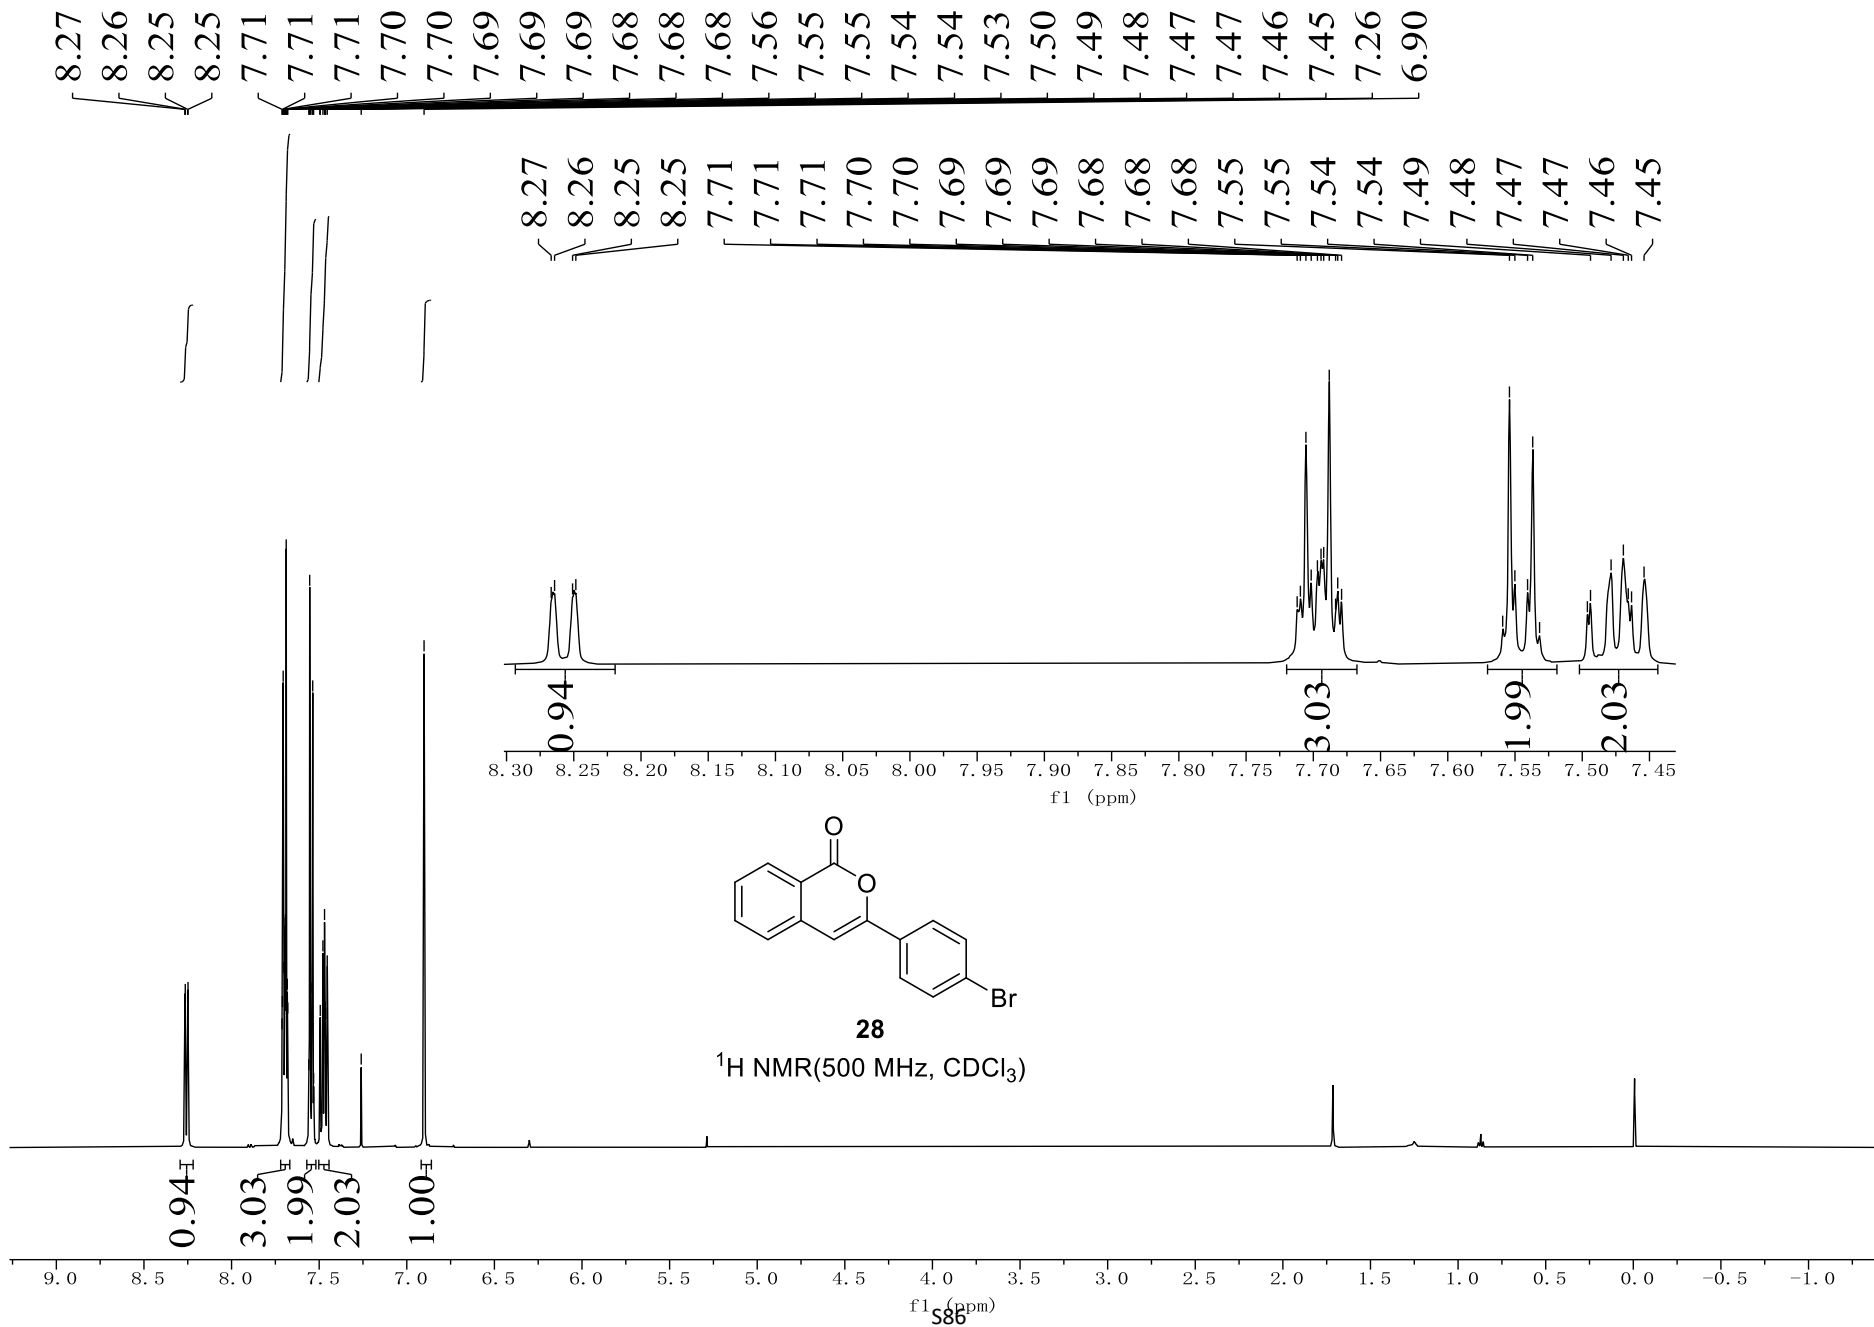

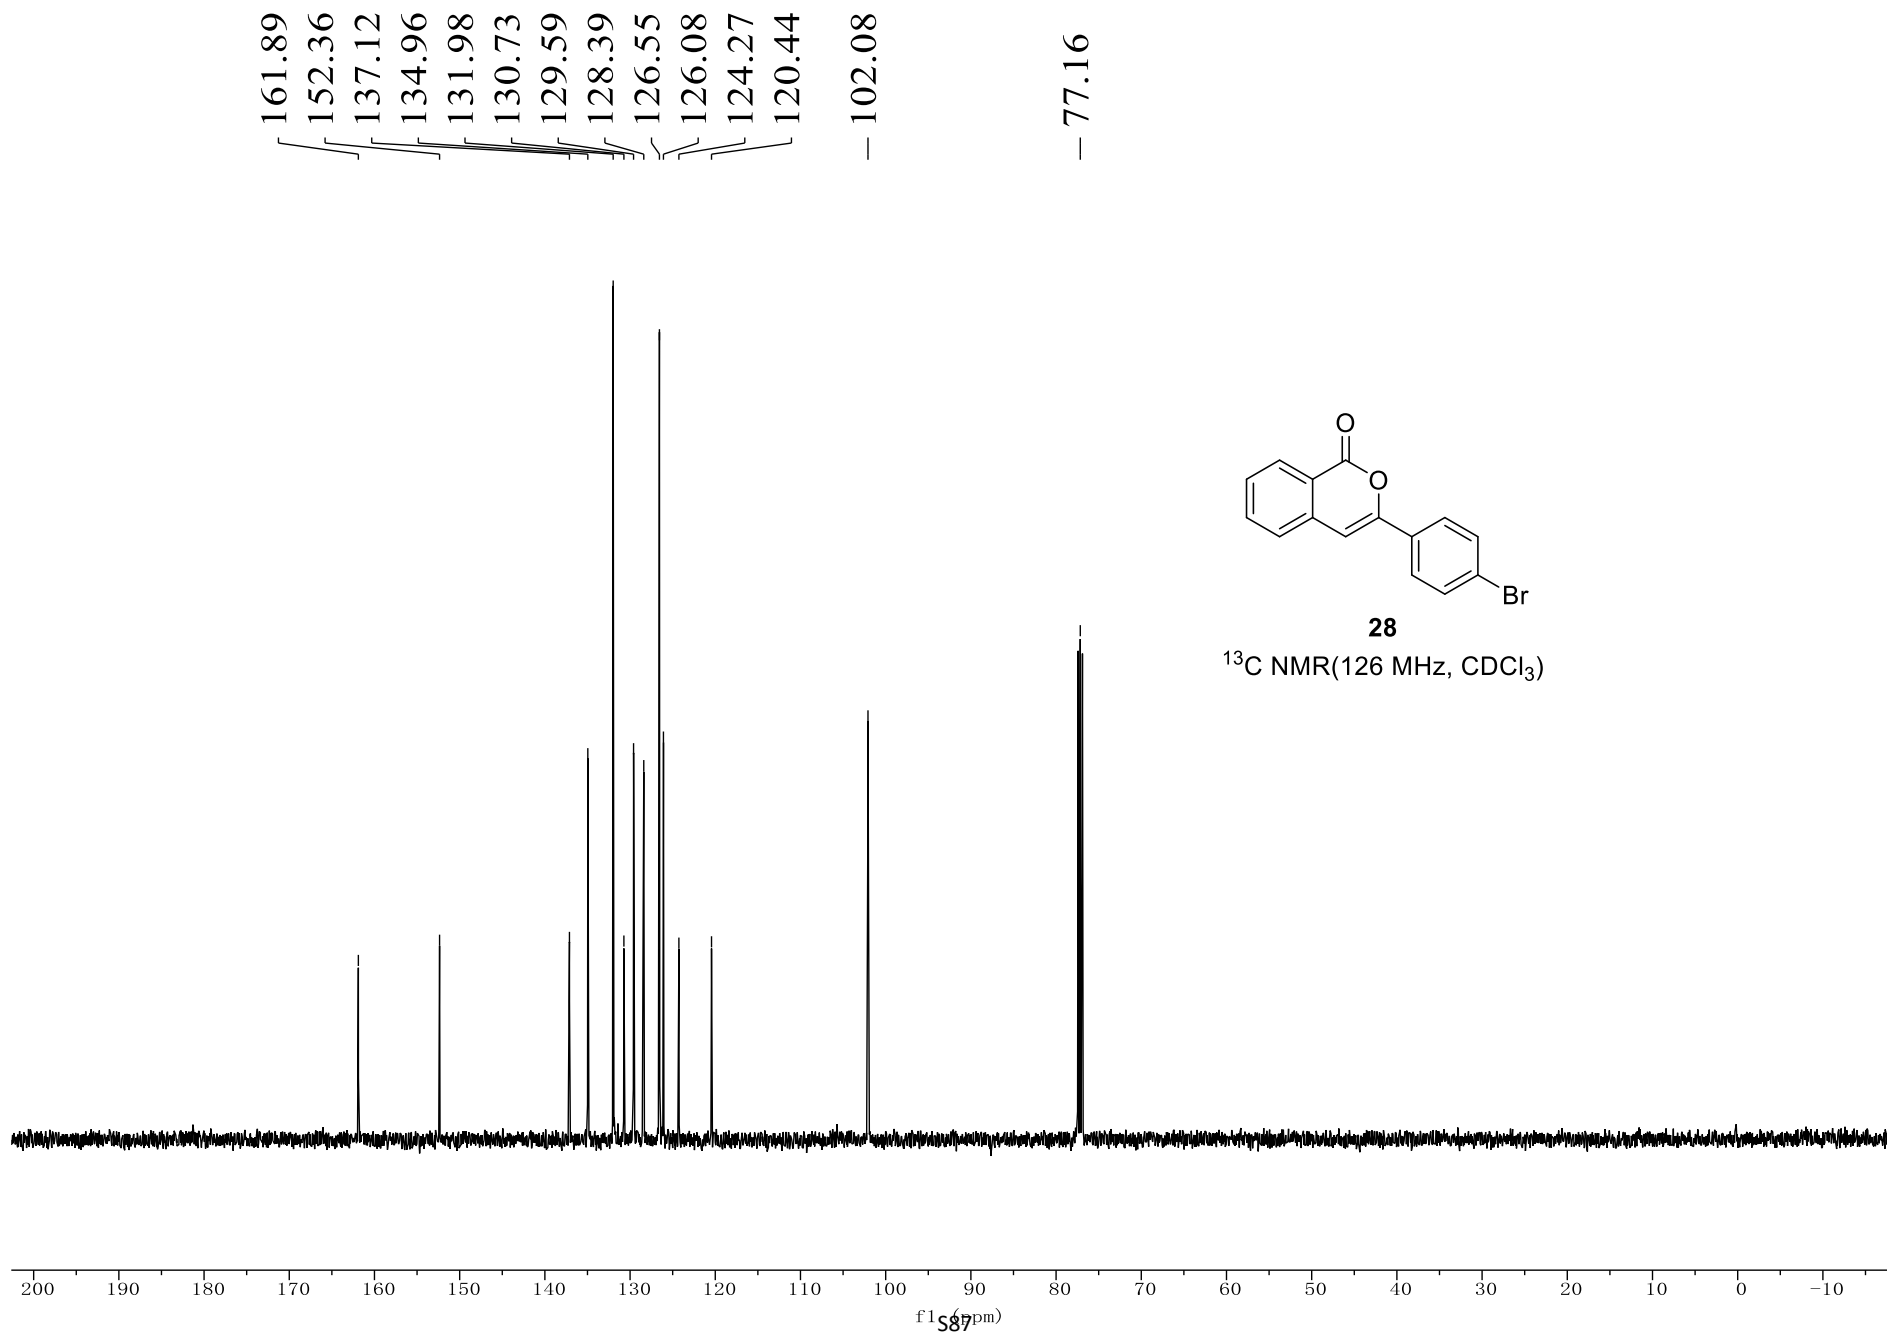

## 11. X-ray Crystallographic Data

11.1 The structure of **2** was determined by the X-ray diffraction. Recrystallized from dichloromethane and petroleum ether. Further information can be found in the CIF file (Deposition number: CCDC 2115491)

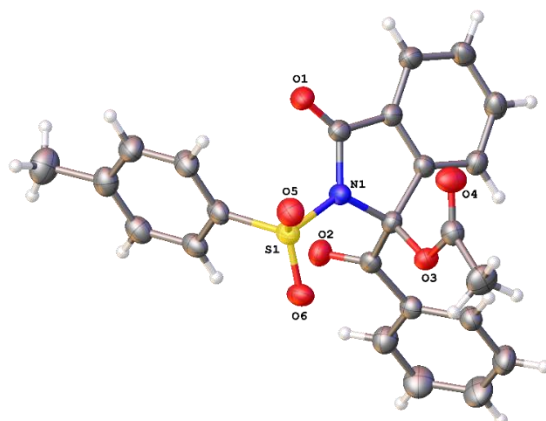

Figure S2. X-ray structure of **2**

|                        |                                            |                                 |             |
|------------------------|--------------------------------------------|---------------------------------|-------------|
| Bond precision:        | C-C = 0.0029 Å                             | Wavelength=0.71073              |             |
| Cell:                  | a=13.649(3)                                | b=14.265(3)                     | c=11.970(2) |
|                        | alpha=90                                   | beta=112.46(3)                  | gamma=90    |
| Temperature:           | 296 K                                      |                                 |             |
|                        | Calculated                                 | Reported                        |             |
| Volume                 | 2153.8(9)                                  | 2153.9(9)                       |             |
| Space group            | P 21/n                                     | P 1 21/n 1                      |             |
| Hall group             | -P 2yn                                     | -P 2yn                          |             |
| Moiety formula         | C24 H19 N O6 S                             | C24 H19 N O6 S                  |             |
| Sum formula            | C24 H19 N O6 S                             | C24 H19 N O6 S                  |             |
| Mr                     | 449.46                                     | 449.46                          |             |
| Dx, g cm <sup>-3</sup> | 1.386                                      | 1.386                           |             |
| Z                      | 4                                          | 4                               |             |
| Mu (mm <sup>-1</sup> ) | 0.192                                      | 0.192                           |             |
| F000                   | 936.0                                      | 936.0                           |             |
| F000'                  | 936.98                                     |                                 |             |
| h, k, lmax             | 18, 19, 16                                 | 18, 19, 16                      |             |
| Nref                   | 5891                                       | 5762                            |             |
| Tmin, Tmax             | 0.977, 0.981                               | 0.714, 0.746                    |             |
| Tmin'                  | 0.977                                      |                                 |             |
| Correction method=     | # Reported T Limits: Tmin=0.714 Tmax=0.746 |                                 |             |
| AbsCorr =              | MULTI-SCAN                                 |                                 |             |
| Data completeness=     | 0.978                                      | Theta (max)= 29.293             |             |
| R(reflections)=        | 0.0492( 3334)                              | wR2(reflections)= 0.1075( 5762) |             |
| S =                    | 1.028                                      | Npar= 291                       |             |
